# Supplementary material for: An I2–DMSO catalytic manifold enabled aromatization for C-ring editing of podophyllotoxone
Source: Royal Society of Chemistry journal article supplement (doi:10.1039/d3ob00927k), 2023-01-01

## Supporting Information

# An I<sub>2</sub>-DMSO Catalytic Manifold Enabled Aromatization for C-Ring Editing of Podophyllotoxone

Peng Yuan<sup>a</sup>, Rui Liu<sup>a</sup>, Hui-Min Zhu<sup>a</sup>, Zhi-Xin Liao<sup>a</sup>, Jia-Chen Xiang<sup>\*a</sup> and An-Xin Wu<sup>\*b</sup>

<sup>a</sup>*School of Chemistry and Chemical Engineering, Southeast University, Nanjing 211189, P.R. China; Orcid*<https://orcid.org/0000-0003-2422-6103>; Email: [xiangjiachen@seu.edu.cn](mailto:xiangjiachen@seu.edu.cn).

<sup>b</sup>*National Key Laboratory of Green Pesticide, International Joint Research Center for Intelligent Biosensor Technology and Health, College of Chemistry, Central China Normal University, Wuhan 430079, P.R. China; Orcid*<http://orcid.org/0000-0001-7673-210X>; Email: [chwuax@mail.ccnu.edu.cn](mailto:chwuax@mail.ccnu.edu.cn).

### Table of Contents

|                                                                                    |     |
|------------------------------------------------------------------------------------|-----|
| 1. General information.....                                                        | S2  |
| 2. Optimization of the reaction conditions.....                                    | S3  |
| 3. General procedure .....                                                         | S5  |
| 4. Synthesis and characterization data of compounds.....                           | S11 |
| 5. Copies of the <sup>1</sup> H, <sup>19</sup> F and <sup>13</sup> C spectra ..... | S26 |
| 6. Crystallographic data and molecular structure of 3b and 10.....                 | S55 |

## 1. General information

NMR spectra were recorded on Bruker AVANCE III HD 600MHz. Chemical shifts ( $\delta$ ) were reported in parts per million (ppm) relative to residual solvent peaks rounded to the nearest 0.01 for proton and 0.1 for carbon (*ref*:  $CDCl_3$  [ $^1H$ : 7.26,  $^{13}C$ : 77.16],  $DMSO-d_6$  [ $^1H$ : 2.5,3.3,  $^{13}C$ : 39.52]). Coupling constants ( $J$ ) were reported in Hz to the nearest 0.1 Hz. Multiplicities are abbreviated as follows: singlet (s), doublet (d), triplet (t), quartet (q), doublet-doublet (dd), quintet (quint), sextet (sext), septet (sept), multiplet (m), and broad (b). High-resolution mass spectrometry (HRMS) data was obtained on Thermo Scientific Q Exactive instrument (ESI Source, mass analyzer type is orbitrap). LC/MS spectrometry data was obtained on Agilent 1260-Ultivo LC/TQ instrument (ESI Source).

**Materials and Methods:** Unless otherwise stated, starting materials were purchased from commercial sources. Solvents were purchased in HPLC quality. Reactions were monitored by thin layer chromatography (TLC). Compounds were visualized by UV-light at 254 nm and 365 nm and by dipping the plates in a phosphomolybdic acid ethanol solution followed by heating. Flash column chromatography was performed over silica gel (300-400 mesh). The  $CDCl_3$  used in the NMR experiments was stored over anhydrous  $K_2CO_3$  before use.

## 2. Optimization of the reaction conditions

### 2.1 Table S1: Screening the temperature of reaction A

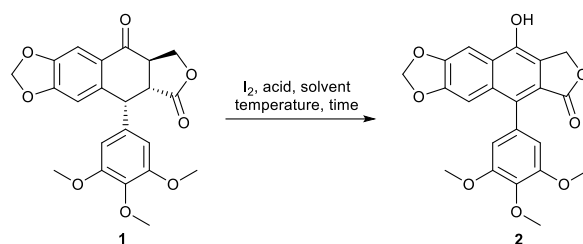

| Entry | I <sub>2</sub> (equiv) | Acid                           | Acid equiv | Solvent | Temperature (°C) | Yield % of <b>2</b> |
|-------|------------------------|--------------------------------|------------|---------|------------------|---------------------|
| 1     | 0.1                    | none                           | 0          | DMSO    | 80               | trace               |
| 2     | 0                      | HI                             | 0.2        | DMSO    | 80               | trace               |
| 3     | 0.1                    | HCl                            | 2.5        | DMSO    | 80               | 89                  |
| 4     | 0.1                    | HBr                            | 2.5        | DMSO    | 80               | 83                  |
| 5     | 0.1                    | HI                             | 2.5        | DMSO    | 80               | 53                  |
| 6     | 0.1                    | H <sub>2</sub> SO <sub>4</sub> | 2.5        | DMSO    | 80               | 76                  |
| 7     | 0.1                    | TsOH·H <sub>2</sub> O          | 2.5        | DMSO    | 80               | 87                  |
| 8     | 0.1                    | TFA                            | 2.5        | DMSO    | 80               | 55                  |
| 9     | 0.1                    | TFAA                           | 2.5        | DMSO    | 80               | 37                  |
| 10    | 0.1                    | ZrCl <sub>4</sub>              | 0.2        | DMSO    | 80               | 31                  |
| 11    | 0.1                    | In(OTf) <sub>3</sub>           | 0.2        | DMSO    | 80               | trace               |
| 12    | 0.1                    | FeCl <sub>3</sub>              | 0.2        | DMSO    | 80               | trace               |
| 13    | 0                      | HCl                            | 2.5        | DMSO    | 80               | trace               |
| 14    | 0.1                    | HCl                            | 2.5        | DMSO    | 80               | 95                  |
| 15    | 0.2                    | HCl                            | 2.5        | DMSO    | 80               | 93                  |
| 16    | 0.5                    | HCl                            | 2.5        | DMSO    | 80               | 90                  |
| 17    | 1.0                    | HCl                            | 2.5        | DMSO    | 80               | 89                  |
| 18    | 1.5                    | HCl                            | 2.5        | DMSO    | 80               | 87                  |
| 19    | 0.1                    | HCl                            | 2.5        | DMSO    | RT               | trace               |
| 20    | 0.1                    | HCl                            | 2.5        | DMSO    | 40               | 46                  |
| 21    | 0.1                    | HCl                            | 2.5        | DMSO    | 60               | 79                  |
| 22    | 0.1                    | HCl                            | 2.5        | DMSO    | 80               | 93                  |
| 23    | 0.1                    | HCl                            | 2.5        | DMSO    | 100              | 99                  |
| 24    | 0.1                    | HCl                            | 2.5        | DMSO    | 120              | 95                  |
| 25    | 1.0                    | HCl                            | 2.5        | DMA     | 100              | 95                  |
| 26    | 1.0                    | HCl                            | 2.5        | NMP     | 100              | 91                  |
| 27    | 0.1                    | HCl                            | 2.5        | DMA     | 100              | trace               |
| 28    | 0.1                    | HCl                            | 2.5        | NMP     | 100              | trace               |

Standard Conditions A : **1** (0.5 mmol), HCl (37 wt % aq.), I<sub>2</sub>, and solvent (2.5mL, *c* 0.2M) were added to a pressure vessel and stirred at a certain temperature for 2h.

## 2.2 Table S2: Screening the temperature of reaction B

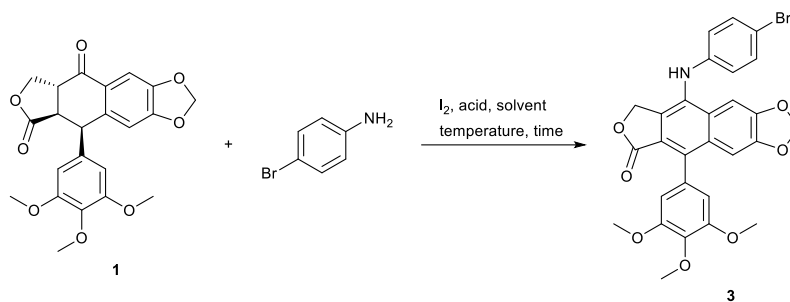

| Entry | Aniline (equiv) | I <sub>2</sub> (equiv) | Acid                           | Acid equiv | Solvent    | Temperature (°C) | Yield % of <b>3</b> |
|-------|-----------------|------------------------|--------------------------------|------------|------------|------------------|---------------------|
| 1     | 1.5             | 0.2                    | HCl                            | 0.1        | DMSO       | RT               | trace               |
| 2     | 1.5             | 0.2                    | HCl                            | 0.1        | DMSO       | 40               | trace               |
| 3     | 1.5             | 0.2                    | HCl                            | 0.1        | DMSO       | 60               | 20                  |
| 4     | 1.5             | 0.2                    | HCl                            | 0.1        | DMSO       | 80               | 36                  |
| 5     | 1.5             | 0.2                    | HCl                            | 0.1        | DMSO       | 100              | trace               |
| 6     | 1.5             | 0.2                    | H <sub>2</sub> SO <sub>4</sub> | 0.1        | DMSO       | 80               | 29                  |
| 7     | 1.5             | 0.2                    | TFA                            | 0.1        | DMSO       | 80               | 66                  |
| 8     | 1.5             | 0.2                    | TFAA                           | 0.1        | DMSO       | 80               | 32                  |
| 9     | 1.5             | 0.2                    | TsOH·H <sub>2</sub> O          | 0.1        | DMSO       | 80               | 45                  |
| 10    | 1.5             | 0.2                    | HBr                            | 0.1        | DMSO       | 80               | 21                  |
| 11    | 1.5             | 0.2                    | HI                             | 0.1        | DMSO       | 80               | 27                  |
| 12    | 1.5             | 0.2                    | ZrCl <sub>4</sub>              | 0.1        | DMSO       | 80               | 42                  |
| 13    | 1.5             | 0.2                    | In(OTf) <sub>3</sub>           | 0.1        | DMSO       | 80               | trace               |
| 14    | 1.5             | 0.2                    | CuCl <sub>2</sub>              | 0.1        | DMSO       | 80               | 28                  |
| 15    | 1.5             | 0                      | TFA                            | 0.1        | DMSO       | 80               | trace               |
| 16    | 1.5             | 0.1                    | TFA                            | 0.1        | DMSO       | 80               | 71                  |
| 17    | 1.5             | 0.2                    | TFA                            | 0.1        | DMSO       | 80               | 66                  |
| 18    | 1.5             | 0.5                    | TFA                            | 0.1        | DMSO       | 80               | 53                  |
| 19    | 1.5             | 1.0                    | TFA                            | 0.1        | DMSO       | 80               | 52                  |
| 20    | 1.5             | 0.1                    | TFA                            | 0.1        | DMSO + NMP | 80               | trace               |
| 21    | 1.5             | 0.1                    | TFA                            | 0.1        | DMSO + DMF | 80               | 48                  |
| 22    | 1.5             | 0.1                    | TFA                            | 0.1        | DMSO + DMA | 80               | 52                  |

Standard Conditions B : **1** (0.5 mmol), aniline (0.75 mmol, 1.5 equiv), TFA (0.05mmol, 0.1 equiv), I<sub>2</sub> (0.05mmol, 0.1 equiv), and DMSO (2.5mL, *c* 0.2M) were added to a pressure vessel and stirred at 80 °C for 4-8h.

### 3. General procedure

#### 3.1 General procedure for the synthesis of 2a-2g, 2j-2l

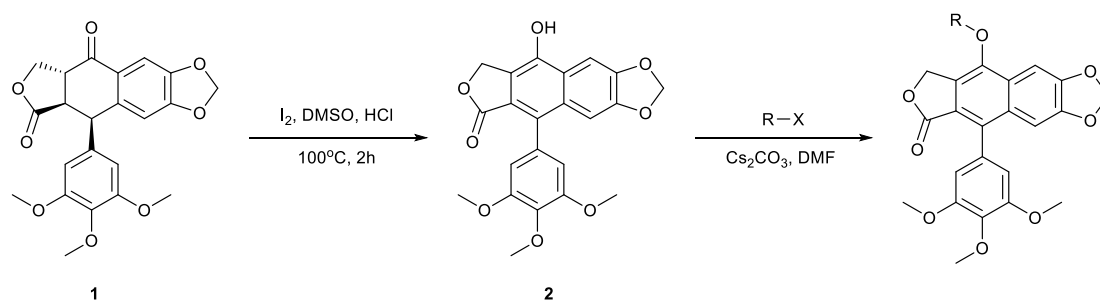

To a flame-dried pressure sealed tube charged with 206.2 mg podophyllotoxone (0.5mmol) and 12.7 mg (0.05 mmol, 10 mol%) iodine was added 2.5 mL ( $c = 0.2$  M) of DMSO. Then 105  $\mu$ L (1.25 mmol, 2.5 equiv) of 37 wt% hydrochloric acid aqueous solution was added and the pressure tube was quickly closed. The reaction mixture was heated up to 100 °C using a heating block and stirred at the same temperature for 2 hours, and the reaction was monitored by TLC. When the reaction is completed, the reaction was quenched by slow addition of saturated Na<sub>2</sub>S<sub>2</sub>O<sub>3</sub>, water and ethyl acetate. The mixture was then poured into a separating funnel. After the phases were separated, and the aqueous phase was extracted three times with ethyl acetate. The combined organic layers were washed with brine, dried over Na<sub>2</sub>SO<sub>4</sub>, and concentrated by rotary evaporation to get a mixture of tetradehydropodophyllotoxin. Then this mixture was shifted into a new flame-dried pressure sealed tube and dissolved in DMF (2 mL). 325.8 mg Caesium carbonate (1.0 mmol, 2.0 equiv) and alkyl bromide (0.75 mmol, 1.5 equiv) was then added into the solution at room temperature. The mixture was stirred for 1-4 hours, then poured into water, and extracted with ethyl acetate. The extract was washed with brine, dried over Na<sub>2</sub>SO<sub>4</sub>, and concentrated by rotary evaporation. The crude product can be separated by silica gel column chromatography to obtain the target product **2a-2g** and **2j-2l**.

#### 3.2 General procedure for the synthesis of 2h

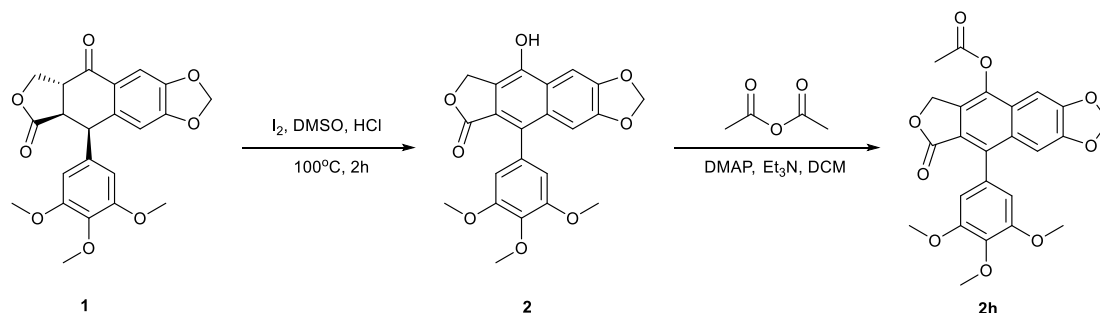

To a flame-dried pressure sealed tube charged with 206.2 mg podophyllotoxone (0.5mmol) and 12.7 mg (0.05 mmol, 10 mol%) iodine was added 2.5 mL ( $c = 0.2$  M) of DMSO. Then 105  $\mu$ L (1.25 mmol, 2.5 equiv) of 37 wt% hydrochloric acid aqueous solution was added and the pressure tube was quickly closed. The reaction mixture was heated up to 100 °C using a heating block and stirred at the same temperature for 2 hours, and the reaction was monitored by TLC. When the reaction is completed, the

reaction was quenched by slow addition of saturated  $\text{Na}_2\text{S}_2\text{O}_3$ , water and ethyl acetate. The mixture was then poured into a separating funnel. After the phases were separated, and the aqueous phase was extracted three times with ethyl acetate. The combined organic layers were washed with brine, dried over  $\text{Na}_2\text{SO}_4$ , and concentrated by rotary evaporation to get a mixture of tetradehydropodophyllotoxin. Then this mixture was shifted into a new flame-dried pressure sealed tube and dissolved in DCM (5 mL). 10.0 mg DMAP and 51.2  $\mu\text{L}$  acetanhydride (0.55 mmol, 1.1 equiv), 76.7  $\mu\text{L}$   $\text{Et}_3\text{N}$  (0.55 mmol, 1.1 equiv) was then added into the solution at room temperature. The mixture was stirred for another 1 hours, then poured into water, and extracted with ethyl acetate. The extract was washed with brine, dried over  $\text{Na}_2\text{SO}_4$ , and concentrated by rotary evaporation. The crude product can be separated by silica gel column chromatography to obtain the target product **2h**.

### 3.3 General procedure for the synthesis of **2i**

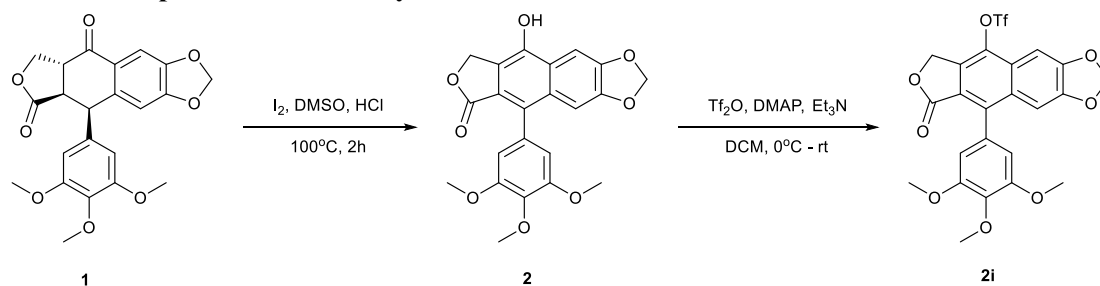

To a flame-dried pressure sealed tube charged with 206.2 mg podophyllotoxone (0.5mmol) and 12.7 mg (0.05 mmol, 10 mol%) iodine was added 2.5 mL ( $c = 0.2$  M) of DMSO. Then 105  $\mu\text{L}$  (1.25 mmol, 2.5 equiv) of 37 wt% hydrochloric acid aqueous solution was added and the pressure tube was quickly closed. The reaction mixture was heated up to  $100^\circ\text{C}$  using a heating block and stirred at the same temperature for 2 hours, and the reaction was monitored by TLC. When the reaction is completed, the reaction was quenched by slow addition of saturated  $\text{Na}_2\text{S}_2\text{O}_3$ , water and ethyl acetate. The mixture was then poured into a separating funnel. After the phases were separated, and the aqueous phase was extracted three times with ethyl acetate. The combined organic layers were washed with brine, dried over  $\text{Na}_2\text{SO}_4$ , and concentrated by rotary evaporation to get a mixture of tetradehydropodophyllotoxin. Then the mixture was shifted into a new flame-dried pressure sealed tube and  $\text{Et}_3\text{N}$  (104.6  $\mu\text{L}$ , 0.75 mmol) and DMAP (6.11 mg, 0.05 mmol) were added and dissolved in  $\text{CH}_2\text{Cl}_2$  (2.0 M). Then  $\text{Tf}_2\text{O}$  (107.1  $\mu\text{L}$ , 0.75 mmol) was added at  $0^\circ\text{C}$ . The resulting mixture was warmed to room temperature and stirred for another 6 hours. The reaction was quenched with aqueous saturated  $\text{NaHCO}_3$  and extracted with ethyl acetate. The combined organic layer was dried over anhydrous  $\text{Na}_2\text{SO}_4$  and concentrated under reduced pressure after filtration. The crude product was purified by flash column chromatography on silica gel to provide the pure compound **2i**.

### 3.4 General procedure for the synthesis of 3a-3i

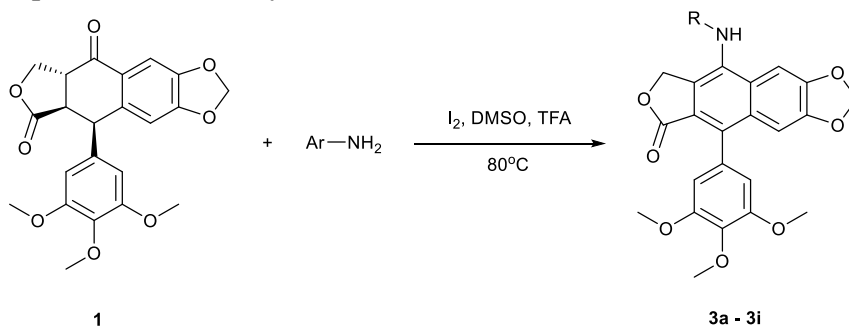

To a flame-dried pressure sealed tube charged with 206.2 mg podophyllotoxone (0.5mmol), aniline (0.75 mmol, 1.5 equiv) and 12.7 mg (0.05 mmol, 10 mol%) iodine was added 2.5 mL ( $c = 0.2$  M) of DMSO. Then 38  $\mu$ L (0.05 mmol, 0.1 equiv) of trifluoroacetic acid was added and the pressure tube was quickly closed. The reaction mixture was heated up to 80 °C using a heating block and stirred at the same temperature for several hours, and the reaction was monitored by TLC. When the reaction is completed, the reaction was quenched by slow addition of saturated Na<sub>2</sub>S<sub>2</sub>O<sub>3</sub> solution, water and ethyl acetate. The mixture was then poured into a separating funnel. After the phases were separated, and the aqueous phase was extracted three times with ethyl acetate. The combined organic layers were washed with brine, dried over Na<sub>2</sub>SO<sub>4</sub>, and concentrated by rotary evaporation. The crude product can be separated by silica gel column chromatography to obtain the target product **3a-3i**.

### 3.5 General procedure for the synthesis of 4

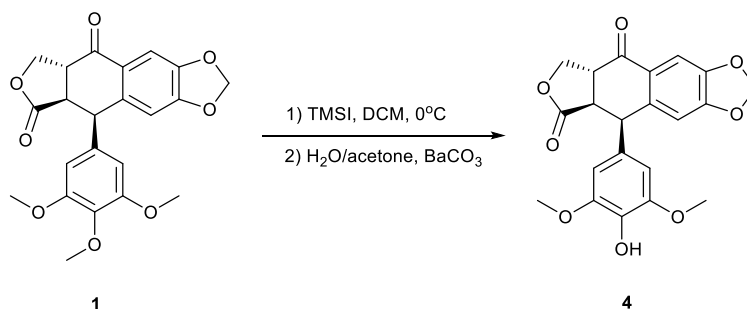

To a solution of 618.6 mg podophyllotoxone **1** (1.5 mmol) in dry dichloromethane (20 mL) was added at 0°C a solution of TMSI (667.8  $\mu$ L, 3.0 equiv). The reaction mixture was stirred for 5h at 0°C then a mixture of H<sub>2</sub>O/acetone (10 mL:10 mL) and BaCO<sub>3</sub> (299.0 mg, 1.01 equiv) were added successively. After 30 min at 40 °C, the resultant mixture was diluted with dichloromethane, then poured into 10% NaS<sub>2</sub>O<sub>3</sub> solution. The combined organic layer was dried over anhydrous Na<sub>2</sub>SO<sub>4</sub> and concentrated under reduced pressure after filtration. The crude product was purified by flash column chromatography on silica gel to provide the pure compound **4**.

### 3.6 General procedure for the synthesis of 5

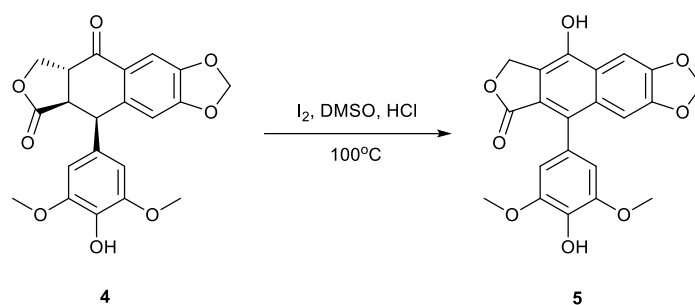

To a flame-dried pressure sealed tube charged with 199.2 mg **4** (0.5 mmol) and 12.7 mg (0.05 mmol, 10 mol%) iodine was added 2.5 mL ( $c = 0.2$  M) of DMSO. Then 105  $\mu$ L (1.25 mmol, 2.5 equiv) of 37 wt% hydrochloric acid aqueous solution was added and the pressure tube was quickly closed. The reaction mixture was heated up to 100 °C using a heating block and stirred at the same temperature for 2 hours, and the reaction was monitored by TLC. When the reaction is completed, the reaction was quenched by slow addition of saturated Na<sub>2</sub>S<sub>2</sub>O<sub>3</sub> solution, water and ethyl acetate. The mixture was then poured into a separating funnel. After the phases were separated, and the aqueous phase was extracted three times with ethyl acetate. The combined organic layers were washed with brine, dried over Na<sub>2</sub>SO<sub>4</sub>, and concentrated by rotary evaporation. The crude product can be separated by silica gel column chromatography to obtain the target product **5**.

### 3.7 General procedure for the synthesis of 6a and 6b

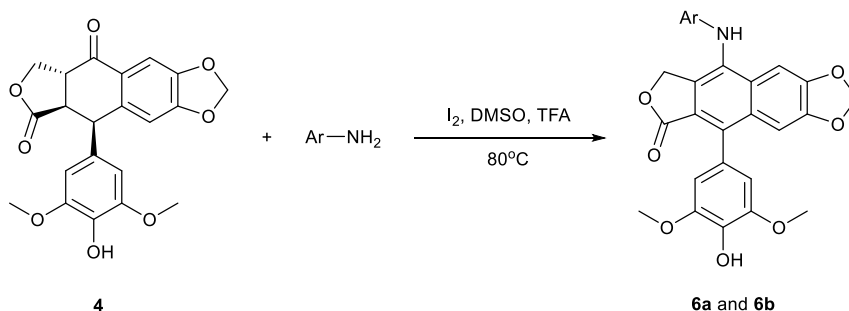

To a flame-dried pressure sealed tube charged with 199.2 mg **4** (0.5 mmol), aniline (0.75 mmol, 1.5 equiv) and 12.7 mg (0.05 mmol, 10 mol%) iodine was added 2.5 mL ( $c = 0.2$  M) of DMSO. Then 38  $\mu$ L (0.05 mmol, 0.1 equiv) of TFA was added and the pressure tube was quickly closed. The reaction mixture was heated up to 80 °C using a heating block and stirred at the same temperature for several hours, and the reaction was monitored by TLC. When the reaction is completed, the reaction was quenched by slow addition of saturated Na<sub>2</sub>S<sub>2</sub>O<sub>3</sub> solution, water and ethyl acetate. The mixture was then poured into a separating funnel. After the phases were separated, and the aqueous phase was extracted three times with ethyl acetate. The combined organic layers were washed with brine, dried over Na<sub>2</sub>SO<sub>4</sub>, and concentrated by rotary evaporation. The crude product can be separated by silica gel column chromatography to obtain the target product **6a** and **6b**.



### 3.8 General procedure for the synthesis of 8a

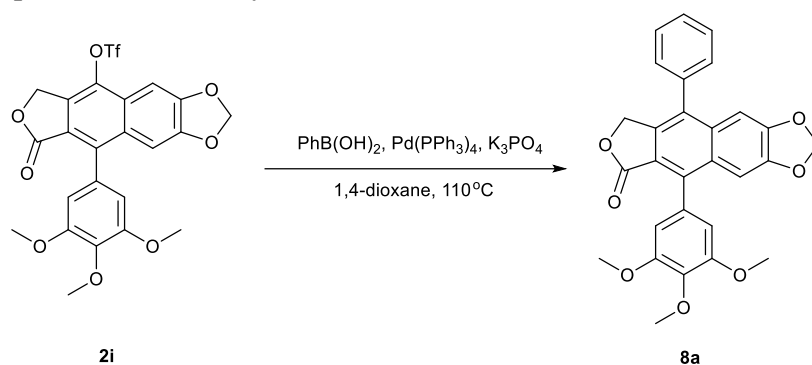

The mixture of compound **2i** (271.2 mg, 0.5 mmol),  $\text{PhB(OH)}_2$  (91.5 mg, 0.75 mmol),  $\text{K}_3\text{PO}_4$  (159.3 mg, 0.75 mmol),  $\text{Pd(PPh}_3)_4$  (57.8 mg, 0.05 mmol) in 1,4-dioxane (5 mL) was heated to  $110^\circ\text{C}$  for 8 hours. The reaction was cooled to room temperature and extracted with ethyl acetate. The combined organic layer was dried over anhydrous  $\text{Na}_2\text{SO}_4$  and filtered. After removing the solvents under reduced pressure, the crude product was purified by flash column chromatography on silica gel to provide the pure compound **8a**.

### 3.9 General procedure for the synthesis of 8b

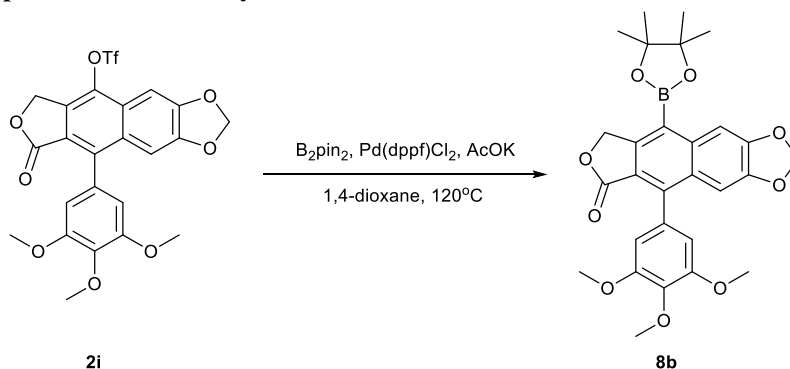

The mixture of compound **2i** (271.2 mg, 0.5 mmol), AcOK (98.1 mg, 1 mmol),  $\text{Pd(dppf)Cl}_2$  (36.6 mg, 0.05 mmol) and bis(pinacolato)diboron (253.9 mg, 1.0 mmol) in 1,4-dioxane (4.0 mL) was stirred in a sealed tube at  $120^\circ\text{C}$  for 6 hours. Then the reaction was cooled to room temperature and extracted with ethyl acetate. The combined organic layer was dried over anhydrous  $\text{Na}_2\text{SO}_4$  and filtered. After removing the solvents under reduced pressure, the crude product was purified by flash column chromatography on silica gel to provide the pure compound **8b**.

### 3.10 General procedure for the synthesis of 8c

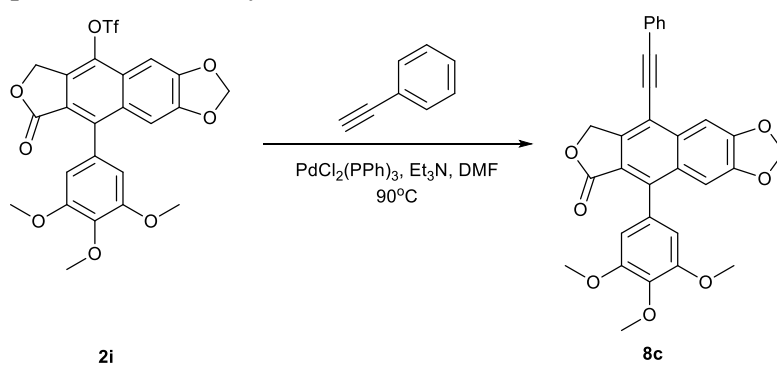

The mixture of compound **2i** (271.2 mg, 0.5 mmol), PdCl<sub>2</sub>(PPh)<sub>3</sub> (10.5 mg, 0.15 mmol) and ethynylbenzene (82.5 μL, 0.75 mmol) and 300 μL Et<sub>3</sub>N in DMF (1.5 mL) was stirred in a sealed tube at 90°C for 18 hours under N<sub>2</sub>. Then the reaction was cooled to room temperature and extracted with ethyl acetate. The combined organic layer was dried over anhydrous Na<sub>2</sub>SO<sub>4</sub> and filtered. After removing the solvents under reduced pressure, the crude product was purified by flash column chromatography on silica gel to provide the pure compound **8c**.

### 3.11 General procedure for the synthesis of **9**

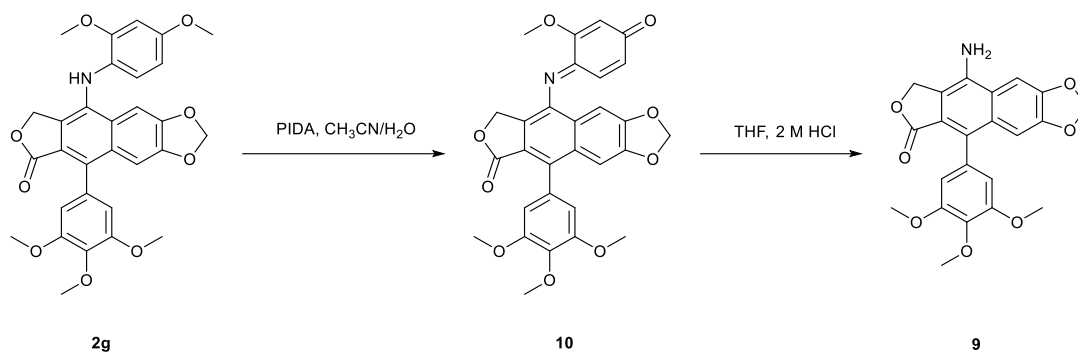

To a stirred solution of compound **3g** (27.3 mg, 0.05 mmol) in CH<sub>3</sub>CN (1.5 mL) and H<sub>2</sub>O (375 μL) at 0°C was added PIDA (32.2 mg, 0.1 mmol) in one portion. Then the resulting solution was stirred at 50 °C for 2h. The reaction was quenched with aqueous saturated NaHCO<sub>3</sub> and extracted with CH<sub>2</sub>Cl<sub>2</sub>. The combined organic layer was dried over anhydrous Na<sub>2</sub>SO<sub>4</sub> and concentrated under reduced pressure after filtration. The crude product was purified by flash column chromatography on silica gel to provide the intermediate compound **10**. Intermediate compound **10** was obtained at 61% yield (16.2 mg) as a wine-red solid.

The intermediate **10** (52.9 mg, 0.1mmol) was then dissolved in THF (2 mL) and 2 M HCl (aq) (2 mL) was added. The reaction mixture was stirred at rt and monitored by TLC. After 3 hours, the reaction was quenched with aqueous saturated NaHCO<sub>3</sub> and extracted with CH<sub>2</sub>Cl<sub>2</sub>. The combined organic layer was dried over anhydrous Na<sub>2</sub>SO<sub>4</sub> and concentrated under reduced pressure after filtration. The crude product was purified by flash column chromatography on silica gel to provide compound **9** at 70% yield (28.5 mg) as a white solid.

#### 4. Synthesis and characterization data of compounds

9-(cycloheptyloxy)-5-(3,4,5-trimethoxyphenyl)furo[3',4':6,7]naphtho[2,3-d][1,3]dioxol-6(8H)-one (**2a**)

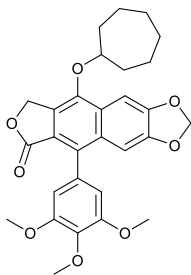

Compound **2a** was synthesized according to general procedure 3.1 starting from podophyllotoxone and bromocycloheptane. Compound **2a** was obtained in 69% yield (174.8 mg) in 3h as a yellow solid.

**mp:** 260-261 °C.

**<sup>1</sup>H NMR (600 MHz, CDCl<sub>3</sub>)** δ 7.56 (s, 1H), 7.04 (s, 1H), 6.51 (s, 2H), 6.07 (s, 2H), 5.39 (s, 2H), 4.38 (tt, *J* = 8.4, 4.5 Hz, 1H), 3.95 (s, 3H), 3.82 (s, 6H), 2.12 – 2.04 (m, 2H), 1.90 (dddd, *J* = 14.2, 10.4, 8.0, 2.5 Hz, 2H), 1.82 – 1.76 (m, 2H), 1.66 – 1.59 (m, 4H), 1.45 (ddd, *J* = 14.7, 6.7, 3.1 Hz, 2H).

**<sup>13</sup>C NMR (151 MHz, CDCl<sub>3</sub>)** δ 169.6, 152.9, 149.8, 148.8, 146.5, 137.6, 135.0, 132.2, 130.6, 129.2, 127.3, 119.4, 107.5, 104.0, 101.9, 99.2, 83.2, 67.0, 61.1, 56.2, 34.6, 28.5, 22.6.

**IR** (KBr, cm<sup>-1</sup>): 2929, 1769, 1584, 1460, 1416, 1344, 1243, 1130, 1081, 1035, 940, 862.

**HRMS** (ESI) *m/z* calcd for C<sub>29</sub>H<sub>31</sub>O<sub>8</sub><sup>+</sup> (M+H)<sup>+</sup> 507.2013, found 507.2015.

9-(allyloxy)-5-(3,4,5-trimethoxyphenyl)furo[3',4':6,7]naphtho[2,3-d][1,3]dioxol-6(8H)-one (**2b**)

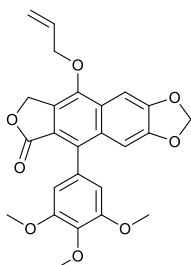

Compound **2b** was synthesized according to general procedure 3.1 starting from podophyllotoxone and 3-bromoprop-1-ene. Compound **2b** was obtained in 67% yield (151.0 mg) in 3h as a yellow solid.

**mp:** 208-210 °C.

**<sup>1</sup>H NMR (600 MHz, CDCl<sub>3</sub>)** δ 7.56 (s, 1H), 7.06 (s, 1H), 6.51 (s, 2H), 6.22 – 6.10 (m, 1H), 6.08 (s, 2H), 5.48 (dd, *J* = 17.1, 1.5 Hz, 1H), 5.45 (s, 2H), 5.35 (dd, *J* = 10.4, 1.4 Hz, 1H), 4.74 – 4.66 (m, 2H), 3.95 (s, 3H), 3.82 (s, 6H).

**<sup>13</sup>C NMR (151 MHz, CDCl<sub>3</sub>)** δ 169.4, 153.0, 150.1, 149.0, 147.4, 137.7, 135.7, 133.1, 132.3, 130.5, 128.4, 127.2, 119.4, 118.8, 107.5, 104.1, 102.0, 98.7, 73.7, 66.7, 61.1, 56.2.

**IR** (KBr, cm<sup>-1</sup>): 1768, 1584, 1503, 1493, 1433, 1413, 1382, 1369, 1344, 1243, 1159, 1125, 1077, 1034, 1019, 980, 935, 855.

**HRMS** (ESI) *m/z* calcd for C<sub>25</sub>H<sub>22</sub>O<sub>8</sub>Na<sup>+</sup> (M+Na)<sup>+</sup> 473.1207, found 473.1209.

9-((3-methylbut-2-en-1-yl)oxy)-5-(3,4,5-trimethoxyphenyl)furo[3',4':6,7]naphtho[2,3-d][1,3]dioxol-6(8H)-one (**2c**)

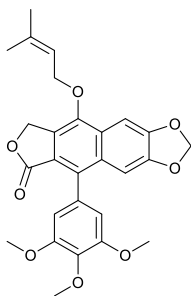

Compound **2c** was synthesized according to general procedure 3.1 starting from podophyllotoxone and 1-bromo-3-methylbut-2-ene. Compound **2c** was obtained in 92% yield (219.7 mg) in 3h as a white solid.

**mp:** 208-210 °C.

**<sup>1</sup>H NMR (600 MHz, CDCl<sub>3</sub>)** δ 7.54 (s, 1H), 7.04 (s, 1H), 6.51 (s, 2H), 6.05 (s, 2H), 5.58 (ddd, *J* = 7.1, 5.6, 1.5 Hz, 1H), 5.43 (s, 2H), 4.67 (d, *J* = 7.0 Hz, 2H), 3.93 (s, 3H), 3.81 (s, 6H), 1.81 (d, *J* = 1.5 Hz, 3H), 1.71 (d, *J* = 1.5 Hz, 3H).

**<sup>13</sup>C NMR (151 MHz, CDCl<sub>3</sub>)** δ 169.5, 152.9, 149.9, 148.8, 147.6, 139.6, 137.6, 135.4, 132.1, 130.5, 128.5, 127.4, 119.6, 119.3, 107.5, 107.4, 104.0, 101.9, 98.7, 69.6, 66.7, 61.0, 56.1, 25.9, 18.2.

**IR (KBr, cm<sup>-1</sup>):** 2940, 1769, 1584, 1464, 1410, 1380, 1346, 1245, 1128, 1034, 856, 799.

**HRMS (ESI) m/z** calcd for C<sub>27</sub>H<sub>26</sub>O<sub>8</sub>Na<sup>+</sup> (M+Na)<sup>+</sup> 501.1520, found 501.1521.

9-(but-2-yn-1-yloxy)-5-(3,4,5-trimethoxyphenyl)furo[3',4':6,7]naphtho[2,3-d][1,3]dioxol-6(8H)-one (**2d**)

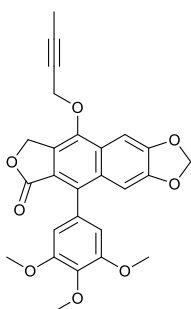

Compound **2d** was synthesized according to general procedure 3.1 starting from podophyllotoxone and 1-bromobut-2-yne. Compound **2d** was obtained in 93% yield (215.0 mg) in 3h as a white solid.

**mp:** 210-212 °C.

**<sup>1</sup>H NMR (600 MHz, CDCl<sub>3</sub>)** δ 7.55 (s, 1H), 7.08 (s, 1H), 6.53 (s, 2H), 6.09 (s, 2H), 5.54 (s, 2H), 4.81 (s, 2H), 3.96 (s, 3H), 3.84 (s, 6H), 1.87 (s, 3H).

**<sup>13</sup>C NMR (151 MHz, CDCl<sub>3</sub>)** δ 169.5, 153.1, 150.2, 149.0, 146.8, 137.9, 136.4, 132.5, 130.4, 128.7, 128.6, 119.5, 107.6, 104.3, 102.0, 98.7, 85.2, 74.4, 67.0, 61.3, 61.2, 56.3, 3.8.

**IR (KBr, cm<sup>-1</sup>):** 2921, 2242, 1768, 1586, 1491, 1462, 1347, 1246, 1122, 1032, 856.

**HRMS (ESI) m/z** calcd for C<sub>26</sub>H<sub>23</sub>O<sub>8</sub><sup>+</sup> (M+H)<sup>+</sup> 463.1387, found 463.1389.

9-(benzyloxy)-5-(3,4,5-trimethoxyphenyl)furo[3',4':6,7]naphtho[2,3-d][1,3]dioxol-6(8H)-one (**2e**)

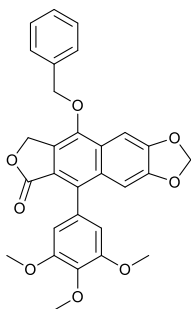

Compound **2e** was synthesized according to general procedure 3.1 starting from podophyllotoxone and (bromomethyl)benzene. Compound **2e** was obtained in 90% yield (224.0 mg) in 3h as a white solid.

**mp:** 258-260 °C.

**<sup>1</sup>H NMR (600 MHz, CDCl<sub>3</sub>)** δ 7.59 (s, 1H), 7.48 – 7.40 (m, 5H), 7.09 (s, 1H), 6.53 (s, 2H), 6.08 (s, 2H), 5.21 (s, 2H), 5.21 (s, 2H), 3.96 (s, 3H), 3.83 (s, 6H).

**<sup>13</sup>C NMR (151 MHz, CDCl<sub>3</sub>)** δ 169.4, 153.0, 150.1, 149.0, 147.3, 137.7, 136.6, 135.9, 132.4, 130.4, 129.0, 128.9, 128.4, 128.1, 127.8, 119.4, 107.5, 104.2, 102.0, 98.7, 75.1, 66.7, 61.1, 56.2.

**IR (KBr, cm<sup>-1</sup>):** 2921, 2242, 1768, 1586, 1491, 1462, 1347, 1246, 1122, 1032, 856.

**HRMS (ESI) m/z** calcd for C<sub>29</sub>H<sub>24</sub>O<sub>8</sub>Na<sup>+</sup> (M+Na)<sup>+</sup> 523.1363, found 523.1367.

9-phenethoxy-5-(3,4,5-trimethoxyphenyl)furo[3',4':6,7]naphtho[2,3-d][1,3]dioxol-6(8H)-one (**2f**)

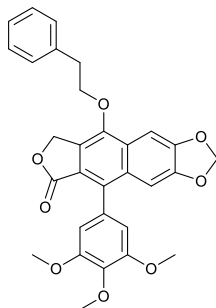

Compound **2f** was synthesized according to general procedure 3.1 starting from podophyllotoxone and (2-bromoethyl)benzene. Compound **2f** was obtained in 70% yield (179.0 mg) in 3h as a white solid.

**mp:** 225-227 °C.

**<sup>1</sup>H NMR (600 MHz, CDCl<sub>3</sub>)** δ 7.41 – 7.28 (m, 6H), 7.04 (s, 1H), 6.50 (s, 2H), 6.06 (s, 2H), 5.25 (s, 2H), 4.37 (t, *J* = 6.5 Hz, 2H), 3.95 (s, 3H), 3.82 (s, 6H), 3.20 (t, *J* = 6.5 Hz, 2H).

**<sup>13</sup>C NMR (151 MHz, CDCl<sub>3</sub>)** δ 169.4, 152.9, 149.9, 148.9, 147.6, 137.9, 137.6, 135.5, 132.2, 130.5, 129.2, 128.8, 128.3, 127.0, 126.8, 119.4, 107.4, 107.4, 104.0, 101.9, 98.6, 73.7, 66.4, 61.1, 56.1, 36.8.

**IR (KBr, cm<sup>-1</sup>):** 2938, 1771, 1581, 1463, 1352, 1240, 1128, 1035, 865, 758, 703.

**HRMS (ESI) m/z** calcd for C<sub>30</sub>H<sub>27</sub>O<sub>8</sub><sup>+</sup> (M+H)<sup>+</sup> 515.1700, found 515.1703.

9-(cinnamyloxy)-5-(3,4,5-trimethoxyphenyl)furo[3',4':6,7]naphtho[2,3-d][1,3]dioxol-6(8H)-one (**2g**)

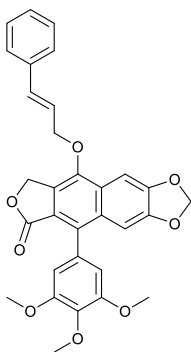

Compound **2g** was synthesized according to general procedure 3.1 starting from podophyllotoxone and (Z)-(3-bromoprop-1-en-1-yl)benzene. Compound **2g** was obtained in 75% yield (197.5 mg) in 3h as a yellow solid.

**mp:** 188-190 °C.

**<sup>1</sup>H NMR (600 MHz, CDCl<sub>3</sub>)** δ 7.61 (s, 1H), 7.43 (d, *J* = 7.2 Hz, 2H), 7.35 (t, *J* = 7.5 Hz, 2H), 7.29 (t, *J* = 7.3 Hz, 1H), 7.08 (s, 1H), 6.78 (d, *J* = 15.8 Hz, 1H), 6.53 (s, 2H), 6.50 (dt, *J* = 15.9, 6.0 Hz, 1H), 6.08 (s, 2H), 5.48 (s, 2H), 4.87 – 4.83 (m, 2H), 3.96 (s, 3H), 3.83 (s, 6H).

**<sup>13</sup>C NMR (151 MHz, CDCl<sub>3</sub>)** δ 169.4, 152.9, 150.1, 148.9, 147.3, 137.6, 135.9, 135.7, 134.1, 132.3, 130.4, 128.8, 128.4, 127.4, 126.7, 123.9, 119.4, 107.4, 107.4, 104.1, 102.0, 98.6, 73.6, 66.7, 61.0, 56.1.

**IR (KBr, cm<sup>-1</sup>):** 2932, 1766, 1586, 1491, 1465, 1350, 1243, 1128, 1035, 969, 856, 798, 752, 697.

**HRMS (ESI) m/z** calcd for C<sub>31</sub>H<sub>27</sub>O<sub>8</sub><sup>+</sup> (M+H)<sup>+</sup> 527.1700, found 527.1703.

8-oxo-9-(3,4,5-trimethoxyphenyl)-6,8-dihydrofuro[3',4':6,7]naphtho[2,3-d][1,3]dioxol-5-yl acetate (**2h**)

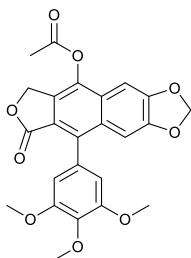

Compound **2h** was synthesized according to general procedure 3.2 starting from podophyllotoxone and acetic anhydride. Compound **2h** was obtained in 94% yield (212.7 mg) in 1h as a yellow solid.

**mp:** 271-273 °C.

**<sup>1</sup>H NMR (600 MHz, CDCl<sub>3</sub>)** δ 7.23 (s, 1H), 7.11 (s, 1H), 6.54 (s, 2H), 6.09 (s, 2H), 5.25 (s, 2H), 3.96 (s, 3H), 3.83 (s, 6H), 2.51 (s, 3H).

**<sup>13</sup>C NMR (151 MHz, CDCl<sub>3</sub>)** δ 169.0, 168.1, 153.1, 150.7, 149.2, 138.8, 138.6, 138.0, 132.3, 130.8, 129.9, 127.8, 119.4, 107.4, 104.4, 102.3, 97.4, 66.4, 61.1, 56.3, 20.8.

**IR (KBr, cm<sup>-1</sup>):** 2938, 1771, 1583, 1508, 1468, 1419, 1367, 1344, 1252, 1191, 1124, 1072, 1038, 1023, 945, 865, 795.

**HRMS (ESI) m/z** calcd for C<sub>24</sub>H<sub>21</sub>O<sub>9</sub><sup>+</sup> (M+H)<sup>+</sup> 453.1180, found 453.1180.

9-oxo-9-(3,4,5-trimethoxyphenyl)-6,8-dihydrofuro[3',4':6,7]naphtho[2,3-d][1,3]dioxol-5-yl trifluoromethanesulfonate (**2i**)

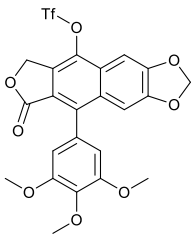

Compound **2i** was synthesized according to general procedure 3.3 starting from podophyllotoxone and trifluoromethanesulfonic anhydride. Compound **2i** was obtained in 79% yield (212.8 mg) in 6h as a white solid.

**mp:** 224-226 °C.

**<sup>1</sup>H NMR (600 MHz, CDCl<sub>3</sub>)** δ 7.42 (s, 1H), 7.14 (s, 1H), 6.52 (s, 2H), 6.15 (s, 2H), 5.47 (s, 2H), 3.96 (s, 3H), 3.83 (s, 6H).

**<sup>13</sup>C NMR (151 MHz, CDCl<sub>3</sub>)** δ 167.9, 153.3, 151.9, 149.8, 141.3, 138.3, 136.4, 133.2, 131.8, 129.1, 128.1, 119.9, 118.7 (d, *J* = 319.9 Hz), 107.2, 104.7, 102.7, 97.5, 65.8, 61.1, 56.31.

**IR (KBr, cm<sup>-1</sup>):** 2973, 2900, 1769, 1468, 1407, 1246, 1227, 1126, 1062, 1037, 818, 761.

**HRMS (ESI) m/z** calcd for C<sub>23</sub>H<sub>18</sub>F<sub>3</sub>O<sub>10</sub>S<sup>+</sup> (M+H)<sup>+</sup> 543.0567, found 543.0569.

(2S,3R,4S,5R,6R)-2-((8-oxo-9-(3,4,5-trimethoxyphenyl)-6,8-dihydrofuro[3',4':6,7]naphtho[2,3-d][1,3]dioxol-5-yl)oxy)-6-((pivaloyloxy)methyl)tetrahydro-2H-pyran-3,4,5-triyl tris(2,2-dimethylpropanoate) (**2j**)

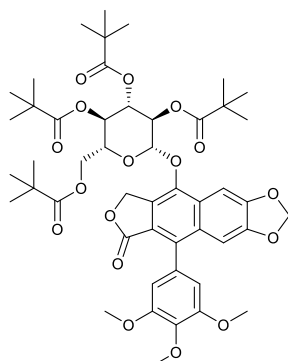

Compound **2j** was synthesized according to general procedure 3.1 starting from podophyllotoxone and (2R,3R,4S,5R,6R)-2-bromo-6-((pivaloyloxy)methyl)tetrahydro-2H-pyran-3,4,5-triyl tris(2,2-dimethylpropanoate). Compound **2j** was obtained in 61% yield (277.0 mg) in 4h as a white solid.

**mp:** 282-284 °C.

**<sup>1</sup>H NMR (600 MHz, CDCl<sub>3</sub>)** δ 7.47 (s, 1H), 7.07 (s, 1H), 6.46 (s, 2H), 6.08 (s, 2H), 5.53 (dd, *J* = 9.6, 8.0 Hz, 1H), 5.48 (d, *J* = 14.9 Hz, 1H), 5.45 – 5.39 (m, 2H), 5.26 – 5.14 (m, 2H), 4.12 (dd, *J* = 12.5, 2.0 Hz, 1H), 4.01 (dd, *J* = 12.4, 5.8 Hz, 1H), 3.92 (s, 3H), 3.80 (s, 3H), 3.79 (s, 3H), 3.68 – 3.63 (m, 1H), 1.27 (s, 9H), 1.15 (s, 9H), 1.12 (s, 9H), 1.07 (s, 9H).

$^{13}\text{C}$  NMR (151 MHz,  $\text{CDCl}_3$ )  $\delta$  177.8, 177.2, 176.7, 176.5, 169.2, 153.0, 152.9, 150.5, 149.0, 143.5, 137.8, 137.5, 132.3, 131.4, 130.1, 127.8, 119.5, 107.3, 107.2, 104.4, 102.2, 101.3, 97.7, 72.7, 72.2, 71.7, 67.8, 67.1, 61.6, 61.0, 56.1, 56.1, 39.0, 38.8, 38.8, 38.8, 27.4, 27.3, 27.1, 27.0.

IR (KBr,  $\text{cm}^{-1}$ ): 2973, 1760, 1740, 1583, 1465, 1353, 1246, 1136, 1084, 1038, 940, 890, 766, 746.

HRMS (ESI)  $m/z$  calcd for  $\text{C}_{48}\text{H}_{61}\text{O}_{17}^+$  ( $\text{M}+\text{H}$ ) $^+$  909.3903, found 909.3909.

(2R,3R,4S,5R,6S)-2-(acetoxymethyl)-6-((8-oxo-9-(3,4,5-trimethoxyphenyl)-6,8-dihydrofuro[3',4':6,7]naphtho[2,3-d][1,3]dioxol-5-yl)oxy)tetrahydro-2H-pyran-3,4,5-triyl triacetate (**2k**)

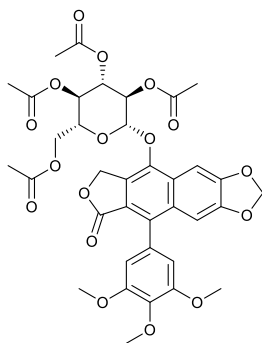

Compound **2k** was synthesized according to general procedure 3.1 starting from podophyllotoxone and (2R,3R,4S,5R,6R)-2-(acetoxymethyl)-6-bromotetrahydro-2H-pyran-3,4,5-triyl triacetate. Compound **2k** was obtained in 60% yield (222.1 mg) in 4h as a yellow solid.

mp: 260-262  $^{\circ}\text{C}$ .

$^1\text{H}$  NMR (600 MHz,  $\text{CDCl}_3$ )  $\delta$  7.49 (s, 1H), 7.09 (s, 1H), 6.50 (d,  $J = 4.2$  Hz, 2H), 6.10 (d,  $J = 6.9$  Hz, 2H), 5.51 (d,  $J = 15.1$  Hz, 1H), 5.47 – 5.39 (m, 2H), 5.29 (t,  $J = 9.5$  Hz, 1H), 5.18 (t,  $J = 9.7$  Hz, 1H), 5.05 (d,  $J = 7.9$  Hz, 1H), 4.22 (dd,  $J = 12.3, 5.8$  Hz, 1H), 4.16 (dd,  $J = 12.4, 2.5$  Hz, 1H), 3.94 (s, 3H), 3.82 (s, 6H), 3.73 – 3.67 (m, 1H), 2.24 (s, 3H), 2.06 (s, 6H), 2.04 (s, 3H).

$^{13}\text{C}$  NMR (151 MHz,  $\text{CDCl}_3$ )  $\delta$  170.5, 170.4, 169.4, 169.4, 169.2, 153.1, 153.0, 150.5, 149.0, 144.3, 137.9, 137.9, 132.4, 130.8, 130.1, 128.2, 119.6, 107.5, 107.3, 104.4, 102.2, 102.0, 97.7, 72.7, 72.4, 71.8, 68.2, 67.3, 62.0, 61.1, 56.3, 56.2, 20.9, 20.7, 20.7, 20.7.

IR (KBr,  $\text{cm}^{-1}$ ): 2944, 1760, 1581, 1465, 1373, 1237, 1128, 1035, 937, 902, 862, 792.

HRMS (ESI)  $m/z$  calcd for  $\text{C}_{36}\text{H}_{37}\text{O}_{17}^+$  ( $\text{M}+\text{H}$ ) $^+$  741.2025, found 741.2026.

(2R,3S,4S,5S,6R)-5-acetamido-2-(acetoxymethyl)-6-((8-oxo-9-(3,4,5-trimethoxyphenyl)-6,8-dihydrofuro[3',4':6,7]naphtho[2,3-d][1,3]dioxol-5-yl)oxy)tetrahydro-2H-pyran-3,4-diyl diacetate (**2l**)

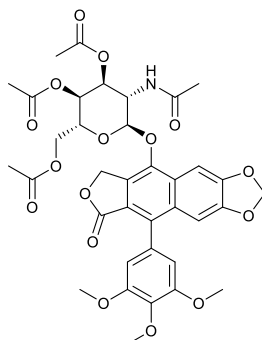



Compound **2l** was synthesized according to general procedure 3.1 starting from podophyllotoxone and 2-Acetamido-3,4,6-tri-O-acetyl-2-deoxy- $\alpha$ -D-glucopyranosyl chloride. Compound **2l** was obtained in 82% yield (302.4 mg) in 4h as a white solid.

**mp**: decomposed.

**<sup>1</sup>H NMR (600 MHz, DMSO-*d*<sub>6</sub>)**  $\delta$  8.36 (d, *J* = 9.2 Hz, 1H), 7.54 (s, 1H), 6.89 (s, 1H), 6.56 (d, *J* = 32.7 Hz, 2H), 6.21 (d, *J* = 13.6 Hz, 2H), 5.55 (dd, *J* = 82.3, 15.2 Hz, 2H), 5.33 – 5.22 (m, 2H), 4.99 (t, *J* = 9.5 Hz, 1H), 4.40 – 4.06 (m, 4H), 3.77 (s, 3H), 3.74 (s, 3H), 3.73 (s, 3H), 2.04 (s, 3H), 2.02 (s, 3H), 1.99 (s, 3H), 1.86 (s, 3H).

**<sup>13</sup>C NMR (151 MHz, DMSO-*d*<sub>6</sub>)**  $\delta$  170.0, 169.9, 169.7, 169.4, 168.6, 152.6, 152.5, 149.9, 148.8, 145.1, 137.1, 135.5, 131.0, 130.2, 127.5, 127.2, 119.4, 107.4, 107.4, 102.7, 102.4, 101.0, 98.0, 71.9, 71.1, 68.6, 67.1, 62.1, 60.1, 55.9, 53.5, 22.7, 20.5, 20.4.

**IR** (KBr, cm<sup>-1</sup>): 3294, 2944, 1772, 1763, 1659, 1466, 1376, 1347, 1240, 1128, 1079, 1038, 937, 905.

**HRMS** (ESI) *m/z* calcd for C<sub>36</sub>H<sub>38</sub>NO<sub>16</sub><sup>+</sup> (M+H)<sup>+</sup> 740.2185, found 740.2184.

5-(2-bromo-3,4,5-trimethoxyphenyl)-9-hydroxyfuro[3',4':6,7]naphtho[2,3-d][1,3]dioxol-6(8H)-one  
(**2m**)

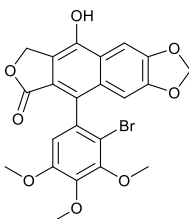

Compound **2m** was synthesized according to first part of general procedure 3.1 starting from 9-(2-bromo-3,4,5-trimethoxyphenyl)-5a,6,8a,9-tetrahydrofuro[3',4':6,7]naphtho[2,3-d][1,3]dioxole-5,8-dione (*Bioorg. Med. Chem. Lett.*, 2018, **28**, 1410-1416.). Compound **2m** was obtained in 99% yield (242.3 mg) in 2h as a white solid.

**mp**: 254-257 °C.

**<sup>1</sup>H NMR (600 MHz, DMSO-*d*<sub>6</sub>)**  $\delta$  10.59 (s, 1H), 7.62 (s, 1H), 6.74 (s, 1H), 6.60 (s, 1H), 6.17 (d, *J* = 4.8 Hz, 2H), 5.45 – 5.35 (m, 2H), 3.88 (s, 3H), 3.84 (s, 3H), 3.73 (s, 3H).

**<sup>13</sup>C NMR (151 MHz, DMSO-*d*<sub>6</sub>)**  $\delta$  169.2, 152.4, 150.2, 148.9, 148.7, 146.0, 142.1, 132.1, 130.5, 128.5, 124.7, 122.2, 119.6, 110.9, 110.2, 102.1, 102.0, 98.3, 67.0, 60.9, 60.8, 56.1.

**IR** (KBr, cm<sup>-1</sup>): 3422, 1724, 1466, 1458, 1428, 1384, 1359, 1244, 1140, 1102, 1036, 998.

**HRMS** (ESI) *m/z* calcd for C<sub>22</sub>H<sub>18</sub>BrO<sub>8</sub><sup>+</sup> (M+H)<sup>+</sup> 489.0181, found 489.0161.

6-(2-chloro-3,4,5-trimethoxyphenyl)-9-hydroxyfuro[3',4':6,7]naphtho[2,3-d][1,3]dioxol-6(8H)-one  
(**2n**)

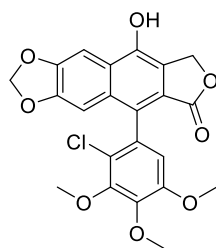

Compound **2n** was synthesized according to first part of general procedure 3.1 starting from 9-(2-chloro-3,4,5-trimethoxyphenyl)-5a,6,8a,9-tetrahydrofuro[3',4':6,7]naphtho[2,3-d][1,3]dioxole-5,8-dione (*Nat. Catal.*, 2020, **3**, 107-115). Compound **2n** was obtained in 96% yield (212.9 mg) in 2h as a white solid.

**mp**: decomposed at 245 °C

**<sup>1</sup>H NMR (600 MHz, DMSO-*d*<sub>6</sub>)** δ 10.59 (s, 1H), 7.62 (s, 1H), 6.73 (s, 1H), 6.64 (s, 1H), 6.17 (d, *J* = 3.1 Hz, 2H), 5.45 – 5.34 (m, 2H), 3.89 (s, 3H), 3.86 (s, 3H), 3.73 (s, 3H).

**<sup>13</sup>C NMR (151 MHz, DMSO-*d*<sub>6</sub>)** δ 169.3, 151.8, 149.3, 148.9, 148.7, 146.0, 142.3, 130.6, 129.9, 126.6, 124.7, 122.2, 119.8, 119.2, 110.7, 102.1, 102.0, 98.3, 67.0, 61.0, 60.8, 56.1.

**IR** (KBr, cm<sup>-1</sup>): 3437, 1725, 1390, 1358, 1245, 1140, 1106, 1036, 1010.

**HRMS** (ESI) *m/z* calcd for C<sub>22</sub>H<sub>18</sub>ClO<sub>8</sub><sup>+</sup> (M+H)<sup>+</sup> 445.0685, found 445.0665.

9-((4-fluorophenyl)amino)-5-(3,4,5-trimethoxyphenyl)furo[3',4':6,7]naphtho[2,3-d][1,3]dioxol-6(8H)-one (**3a**)

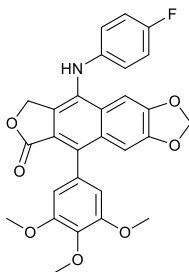

Compound **3a** was synthesized according to general procedure 3.4 starting from podophyllotoxone and 4-fluoroaniline. Compound **3a** was obtained in 49% yield (123.1 mg) in 3h as a yellow solid.

**mp**: 228-230 °C.

**<sup>1</sup>H NMR (600 MHz, DMSO-*d*<sub>6</sub>)** δ 8.21 (s, 1H), 7.44 (s, 1H), 7.02 (t, *J* = 8.6 Hz, 2H), 6.95 (s, 1H), 6.73 – 6.65 (m, 2H), 6.61 (s, 2H), 6.17 (s, 2H), 5.09 (s, 2H), 3.77 (s, 3H), 3.74 (s, 6H).

**<sup>13</sup>C NMR (151 MHz, DMSO-*d*<sub>6</sub>)** δ 169.12, 152.5, 149.1 (d, *J* = 196.3 Hz), 141.6, 137.0, 135.2, 133.4, 131.2, 131.0, 130.6, 129.9, 119.2, 116.4, 116.3, 115.7, 115.6, 107.5, 103.2, 102.3, 99.5, 67.3, 60.1, 55.9.

**<sup>19</sup>F NMR (565 MHz, DMSO-*d*<sub>6</sub>)** δ -125.55 (tt, *J* = 8.4, 4.5 Hz).

**IR** (KBr, cm<sup>-1</sup>): 2912, 1766, 1668, 1581, 1509, 1463, 1246, 1130, 1038, 937, 859, 821.

**HRMS** (ESI) *m/z* calcd for C<sub>28</sub>H<sub>23</sub>FNO<sub>7</sub><sup>+</sup> (M+H)<sup>+</sup> 504.1453, found 504.1457.

9-((4-chlorophenyl)amino)-5-(3,4,5-trimethoxyphenyl)furo[3',4':6,7]naphtho[2,3-d][1,3]dioxol-6(8H)-one (**3b**)

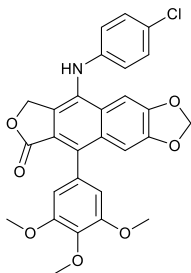

Compound **3b** was synthesized according to general procedure 3.4 starting from podophyllotoxone and 4-chloroaniline. Compound **3b** was obtained in 46% yield (119.2 mg) in 7h as a yellow solid.

**mp:** 244-246 °C.

**<sup>1</sup>H NMR (600 MHz, DMSO-*d*<sub>6</sub>)** δ 8.39 (s, 1H), 7.40 (s, 1H), 7.20 (d, *J* = 8.8 Hz, 2H), 6.97 (s, 1H), 6.66 (d, *J* = 8.8 Hz, 2H), 6.63 (s, 2H), 6.18 (s, 2H), 5.15 (s, 2H), 3.79 (s, 3H), 3.75 (s, 6H).

**<sup>13</sup>C NMR (151 MHz, DMSO-*d*<sub>6</sub>)** δ 169.1, 152.5, 149.8, 148.5, 144.3, 137.0, 136.0, 134.5, 131.0, 130.5, 130.4, 128.9, 121.9, 119.2, 115.9, 107.5, 103.3, 102.4, 99.4, 67.3, 60.1, 55.9.

**IR (KBr, cm<sup>-1</sup>):** 2938, 1766, 1584, 1497, 1465, 1246, 1125, 1032, 940.

**HRMS (ESI) m/z** calcd for C<sub>28</sub>H<sub>23</sub>ClNO<sub>7</sub><sup>+</sup> (M+H)<sup>+</sup> 520.1158, found 520.1158.

10-((4-bromophenyl)amino)-5-(3,4,5-trimethoxyphenyl)furo[3',4':6,7]naphtho[2,3-d][1,3]dioxol-6(8H)-one (**3c**)

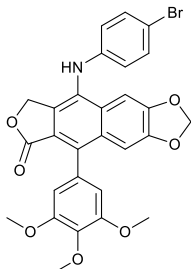

Compound **3c** was synthesized according to general procedure 3.4 starting from Podophyllotoxone and 4-bromoaniline. Compound **3c** was obtained in 71% yield (200.4 mg) in 5h as a yellow solid.

**mp:** 269-270 °C

**<sup>1</sup>H NMR (600 MHz, DMSO-*d*<sub>6</sub>)** δ 8.40 (s, 1H), 7.41 (s, 1H), 7.30 (d, *J* = 7.6 Hz, 2H), 6.99 (s, 1H), 6.64 (s, 2H), 6.61 (d, *J* = 7.6 Hz, 2H), 6.17 (s, 2H), 5.16 (s, 2H), 3.79 (s, 3H), 3.76 (s, 6H).

**<sup>13</sup>C NMR (151 MHz, DMSO-*d*<sub>6</sub>)** δ 169.1, 152.6, 149.8, 148.5, 144.7, 137.0, 136.1, 134.6, 131.8, 131.1, 130.5, 130.5, 130.1, 119.2, 116.4, 109.4, 107.5, 103.3, 102.4, 99.4, 67.3, 60.1, 56.0.

**IR (KBr, cm<sup>-1</sup>):** 1761, 1581, 1493, 1413, 1160, 1070, 1004.

**HRMS (ESI) m/z** calcd for C<sub>28</sub>H<sub>22</sub>BrNO<sub>7</sub>Na<sup>+</sup> (M+Na)<sup>+</sup> 586.0472, found 586.0472.

11-(*p*-tolylamino)-5-(3,4,5-trimethoxyphenyl)furo[3',4':6,7]naphtho[2,3-d][1,3]dioxol-6(8H)-one (**3d**)

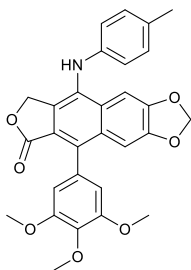

Compound **3d** was synthesized according to general procedure 3.4 starting from podophyllotoxone and p-toluidine. Compound **3d** was obtained in 42% yield (104.5 mg) in 5h as a yellow solid.

**mp:** 247-249 °C.

**<sup>1</sup>H NMR (600 MHz, DMSO-*d*<sub>6</sub>)** δ 8.11 (s, 1H), 7.46 (s, 1H), 7.00 (d, *J* = 8.1 Hz, 2H), 6.95 (s, 1H), 6.62 (d, *J* = 8.7 Hz, 4H), 6.17 (s, 2H), 5.08 (s, 2H), 3.78 (s, 3H), 3.75 (s, 6H), 2.21 (s, 3H).

**<sup>13</sup>C NMR (151 MHz, DMSO-*d*<sub>6</sub>)** δ 169.2, 152.5, 149.5, 148.3, 142.5, 136.9, 134.7, 132.9, 131.5, 131.0, 130.7, 129.8, 129.5, 127.7, 119.2, 115.5, 107.6, 103.1, 102.2, 99.6, 67.4, 60.1, 56.0, 20.2.

**IR** (KBr, cm<sup>-1</sup>): 2941, 1754, 1581, 1512, 1465, 1413, 1361, 1240, 1128, 1035.

**HRMS** (ESI) *m/z* calcd for C<sub>29</sub>H<sub>26</sub>NO<sub>7</sub><sup>+</sup> (M+H)<sup>+</sup> 500.1704, found 500.1705.

10-((4-isopropylphenyl)amino)-5-(3,4,5-trimethoxyphenyl)furo[3',4':6,7]naphtho[2,3-d][1,3]dioxol-6(8H)-one (**3e**)

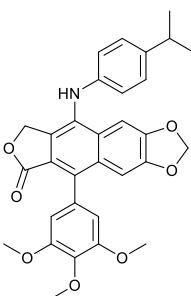

Compound **3e** was synthesized according to general procedure 3.4 starting from podophyllotoxone and 4-isopropylaniline. Compound **3e** was obtained in 34% yield (90.1 mg) in 7h as a brown solid.

**mp:** 246-248 °C.

**<sup>1</sup>H NMR (600 MHz, DMSO-*d*<sub>6</sub>)** δ 8.13 (s, 1H), 7.47 (s, 1H), 7.06 (d, *J* = 8.2 Hz, 2H), 6.96 (s, 1H), 6.64 (d, *J* = 7.9 Hz, 4H), 6.17 (s, 2H), 5.10 (s, 2H), 3.79 (s, 3H), 3.75 (s, 6H), 2.78 (p, *J* = 6.9 Hz, 1H), 1.16 (d, *J* = 6.9 Hz, 6H).

**<sup>13</sup>C NMR (151 MHz, DMSO-*d*<sub>6</sub>)** δ 169.3, 152.5, 149.5, 148.4, 142.9, 139.0, 136.9, 134.9, 133.1, 131.5, 139.0, 130.7, 129.9, 126.9, 119.2, 115.3, 107.6, 103.1, 102.3, 99.7, 67.4, 60.1, 55.9, 32.6, 24.2.

**IR** (KBr, cm<sup>-1</sup>): 2954, 1765, 1585, 1512, 1458, 1246, 1129, 1030, 942, 863, 818.

**HRMS** (ESI) *m/z* calcd for C<sub>31</sub>H<sub>30</sub>NO<sub>7</sub><sup>+</sup> (M+H)<sup>+</sup> 528.2017, found 528.2019.

9-(benzo[d][1,3]dioxol-5-ylamino)-5-(3,4,5-trimethoxyphenyl)furo[3',4':6,7]naphtho[2,3-d][1,3]dioxol-6(8H)-one (**3f**)

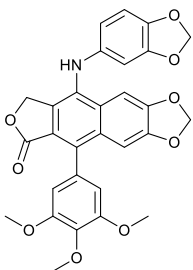

Compound **3f** was synthesized according to general procedure 3.4 starting from podophyllotoxone and benzo[d][1,3]dioxol-5-amine. Compound **3f** was obtained in 66% yield (175.0 mg) in 7h as a yellow solid.

**mp:** 243-245 °C.

**<sup>1</sup>H NMR (600 MHz, DMSO-*d*<sub>6</sub>)** δ 8.04 (s, 1H), 7.49 (s, 1H), 6.95 (s, 1H), 6.75 (d, *J* = 8.3 Hz, 1H), 6.62 (s, 2H), 6.41 (s, 1H), 6.17 (s, 2H), 6.14 (d, *J* = 8.0 Hz, 1H), 5.93 (s, 2H), 5.07 (s, 2H), 3.78 (s, 3H), 3.75 (s, 6H).

**<sup>13</sup>C NMR (151 MHz, DMSO-*d*<sub>6</sub>)** δ 169.2, 152.5, 149.5, 148.3, 147.9, 140.6, 140.1, 136.9, 134.5, 132.4, 132.0, 131.0, 130.8, 129.4, 119.3, 108.4, 108.0, 107.6, 103.1, 102.2, 100.7, 99.6, 98.8, 67.4, 60.1, 55.9.

**IR (KBr, cm<sup>-1</sup>):** 2922, 1760, 1506, 1462, 1243, 1126, 1037, 935.

**HRMS (ESI) m/z** calcd for C<sub>29</sub>H<sub>24</sub>NO<sub>9</sub><sup>+</sup> (M+H)<sup>+</sup> 530.1446, found 530.1449.

9-((2,4-dimethoxyphenyl)amino)-5-(3,4,5-trimethoxyphenyl)furo[3',4':6,7]naphtho[2,3-d][1,3]dioxol-6(8H)-one (**3g**)

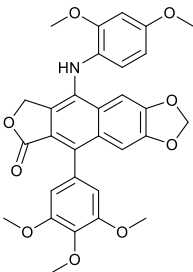

Compound **3g** was synthesized according to general procedure 3.4 starting from podophyllotoxone and 2,4-dimethoxyaniline. Compound **3g** was obtained in 62% yield (169.7 mg) in 8h as a brown solid.

**mp:** 241-243 °C.

**<sup>1</sup>H NMR (600 MHz, DMSO-*d*<sub>6</sub>)** δ 7.59 (s, 1H), 7.40 (s, 1H), 6.89 (s, 1H), 6.67 (d, *J* = 2.7 Hz, 1H), 6.58 (d, *J* = 5.2 Hz, 2H), 6.39 (dd, *J* = 8.6, 2.7 Hz, 1H), 6.16 (s, 2H), 4.81 (s, 2H), 3.84 (s, 3H), 3.77 (s, 3H), 3.74 (d, 9H).

**<sup>13</sup>C NMR (151 MHz, DMSO-*d*<sub>6</sub>)** δ 169.3, 155.6, 152.5, 152.3, 149.1, 148.1, 136.8, 134.2, 132.2, 131.1, 130.9, 128.4, 127.3, 126.1, 120.9, 119.2, 107.7, 104.2, 103.0, 102.1, 99.7, 99.4, 67.1, 60.1, 55.9, 55.7, 55.4.

**IR (KBr, cm<sup>-1</sup>)** 2973, 2913, 1756, 1594, 1502, 1465, 1253, 1123, 1034, 939, 806.

**HRMS (ESI) m/z** calcd for C<sub>30</sub>H<sub>28</sub>NO<sub>9</sub><sup>+</sup> (M+H)<sup>+</sup> 546.1759, found 546.1760.

10-((9,9-dimethyl-9H-fluoren-3-yl)amino)-5-(3,4,5-trimethoxyphenyl)furo[3',4':6,7]naphtho[2,3-d][1,3]dioxol-6(8H)-one (**3h**)

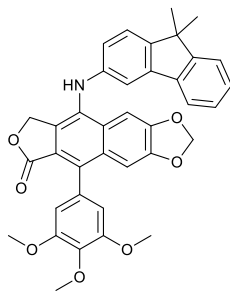

Compound **3h** was synthesized according to general procedure 3.2 starting from podophyllotoxone and 9,9-dimethyl-9H-fluoren-3-amine. Compound **3h** was obtained in 57% yield (171.3 mg) in 7h as a yellow solid.

**mp:** 268-270 °C.

**<sup>1</sup>H NMR (600 MHz, DMSO-*d*<sub>6</sub>)** δ 8.48 (s, 1H), 7.64 (d, *J* = 7.5 Hz, 1H), 7.61 (d, *J* = 8.2 Hz, 1H), 7.56 (s, 1H), 7.46 (d, *J* = 7.4 Hz, 1H), 7.26 (td, *J* = 7.4, 1.2 Hz, 1H), 7.19 (td, *J* = 7.4, 1.2 Hz, 1H), 6.98 (s, 1H), 6.95 (d, *J* = 2.1 Hz, 1H), 6.68 (d, *J* = 2.1 Hz, 1H), 6.65 (s, 2H), 6.18 (s, 2H), 5.11 (s, 2H), 3.79 (s, 3H), 3.77 (s, 6H), 1.40 (s, 6H).

**<sup>13</sup>C NMR (151 MHz, DMSO-*d*<sub>6</sub>)** δ 169.3, 154.8, 152.6, 152.5, 149.5, 148.4, 144.5, 139.0, 137.0, 134.8, 132.7, 131.0, 130.9, 130.7, 130.0, 129.6, 126.9, 125.7, 122.5, 120.9, 119.3, 118.7, 114.3, 109.7, 107.6, 103.2, 102.3, 99.8, 67.6, 60.1, 55.9, 46.3, 27.0.

**IR** (KBr, cm<sup>-1</sup>) 2958, 2916, 1766, 1462, 1360, 1246, 1129, 1130, 945, 875.

**MS** (ESI) *m/z* calcd for C<sub>37</sub>H<sub>31</sub>NO<sub>7</sub>Na<sup>+</sup> (M+Na)<sup>+</sup> 624.2, found 624.1.

3-ethyl-3-(4-((8-oxo-9-(3,4,5-trimethoxyphenyl)-6,8-dihydrofuro[3',4':6,7]naphtho[2,3-d][1,3]dioxol-5-yl)amino)phenyl)piperidine-2,6-dione (**3i**)

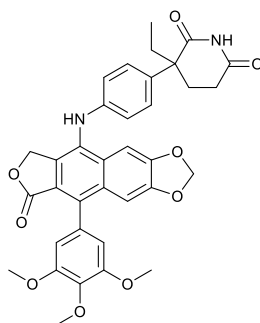

Compound **3i** was synthesized according to general procedure 3.4 starting from podophyllotoxone and 3-(4-aminophenyl)-3-ethylpiperidine-2,6-dione. Compound **3i** was obtained in 51% yield (160.0 mg) in 7h as a white solid.

**mp:** 241-243 °C.

**<sup>1</sup>H NMR (600 MHz, DMSO-*d*<sub>6</sub>)** δ 10.81 (s, 1H), 7.46 (s, 1H), 7.11 (d, *J* = 8.3 Hz, 2H), 6.96 (s, 1H), 6.69 (d, *J* = 8.3 Hz, 2H), 6.63 (s, 2H), 6.18 (s, 2H), 5.10 (s, 2H), 3.78 (s, 3H), 3.75 (s, 6H), 2.47 – 2.40 (m, 1H), 2.29 – 2.24 (m, 1H), 2.19 – 2.11 (m, 2H), 1.86 (q, *J* = 7.4, 6.8 Hz, 1H), 1.79 (q, *J* = 7.4, 6.8 Hz, 1H), 0.76 (t, *J* = 7.4 Hz, 3H).

$^{13}\text{C}$  NMR (151 MHz, DMSO-*d*<sub>6</sub>)  $\delta$  176.0, 172.9, 169.2, 152.5, 149.7, 148.4, 144.0, 137.0, 135.3, 133.7, 131.0, 130.9, 130.6, 130.2, 129.6, 127.0, 119.2, 115.1, 107.6, 103.1, 102.3, 99.6, 67.4, 60.1, 56.0, 49.5, 32.3, 29.2, 26.0, 9.0.

IR (KBr,  $\text{cm}^{-1}$ ) 2974, 1763, 1680, 1516, 1465, 1246, 1129, 1037, 942, 831.

HRMS (ESI)  $m/z$  calcd for  $\text{C}_{35}\text{H}_{33}\text{N}_2\text{O}_9^+$  (M+H)<sup>+</sup> 625.2186, found 625.2181.

9-hydroxy-5-(4-hydroxy-3,5-dimethoxyphenyl)furo[3',4':6,7]naphtho[2,3-d][1,3]dioxol-6(8H)-one (**5**)

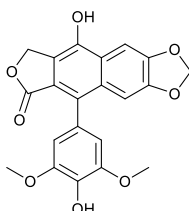

Compound **5** was synthesized according to general procedure 3.6 starting from compound **4**. Compound **5** was obtained in 64% yield (126.8 mg) in 4h as a white solid.

mp: >300°C.

$^1\text{H}$  NMR (600 MHz, DMSO-*d*<sub>6</sub>)  $\delta$  10.36 (s, 1H), 8.47 (s, 1H), 7.60 (s, 1H), 6.90 (s, 1H), 6.48 (s, 2H), 6.16 (s, 2H), 5.34 (s, 2H), 3.71 (s, 6H).

$^{13}\text{C}$  NMR (151 MHz, DMSO-*d*<sub>6</sub>)  $\delta$  169.4, 148.7, 148.3, 147.6, 145.2, 135.0, 131.2, 131.0, 125.2, 124.6, 122.4, 119.1, 107.9, 102.8, 102.0, 98.0, 66.5, 56.0.

IR (KBr,  $\text{cm}^{-1}$ ) 2974, 2900, 1756, 1465, 1249, 1097, 1030, 1011, 736.

HRMS (ESI)  $m/z$  calcd for  $\text{C}_{21}\text{H}_{17}\text{O}_8^+$  (M+H)<sup>+</sup> 397.0918, found 397.0918.

3-ethyl-3-(4-((9-(4-hydroxy-3,5-dimethoxyphenyl)-8-oxo-6,8-dihydrofuro[3',4':6,7]naphtho[2,3-d][1,3]dioxol-5-yl)amino)phenyl)piperidine-2,6-dione (**6a**)

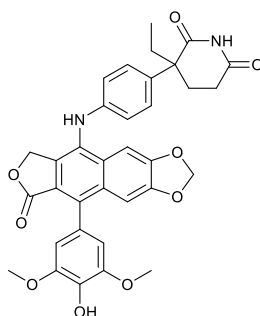

Compound **6a** was synthesized according to general procedure 3.7 starting from compound **4** and 3-(4-aminophenyl)-3-ethylpiperidine-2,6-dione. Compound **6a** was obtained in 44% yield (134.0 mg) in 7h as a yellow solid.

mp: 268-270 °C.

$^1\text{H}$  NMR (600 MHz, DMSO-*d*<sub>6</sub>)  $\delta$  10.79 (s, 1H), 8.52 (s, 1H), 8.25 (s, 1H), 7.44 (s, 1H), 7.10 (d,  $J$  = 8.5 Hz, 2H), 7.01 (s, 1H), 6.68 (d,  $J$  = 8.5 Hz, 2H), 6.57 (s, 2H), 6.17 (s, 2H), 5.09 (s, 2H), 3.74 (s, 6H), 2.45 (d,  $J$  = 17.0 Hz, 1H), 2.27 (d,  $J$  = 12.5 Hz, 1H), 2.22 – 2.09 (m, 2H), 1.85 (dq,  $J$  = 14.6, 7.3 Hz, 1H), 1.78 (dq,  $J$  = 14.4, 7.3 Hz, 1H), 0.76 (t,  $J$  = 7.4 Hz, 3H).

$^{13}\text{C}$  NMR (151 MHz, DMSO-*d*<sub>6</sub>)  $\delta$  176.0, 172.9, 169.2, 149.6, 148.3, 147.6, 144.1, 136.1, 135.3, 134.0, 131.2, 130.5, 130.3, 129.5, 127.0, 124.8, 119.2, 114.9, 107.8, 103.3, 102.2, 99.5, 67.1, 56.1, 49.4, 32.2, 29.1, 26.0, 8.9.

IR (KBr,  $\text{cm}^{-1}$ ) 2973, 2913, 1760, 1700, 1512, 1458, 1240, 1199, 1040, 834, 749.

HRMS (ESI)  $m/z$  calcd for  $\text{C}_{34}\text{H}_{31}\text{N}_2\text{O}_9^+$  (M+H)<sup>+</sup> 611.2024, found 611.2025.

9-((9,9-dimethyl-9H-fluoren-2-yl)amino)-5-(4-hydroxy-3,5-dimethoxyphenyl)furo[3',4':6,7]naphtho[2,3-d][1,3]dioxol-6(8H)-one (**6b**)

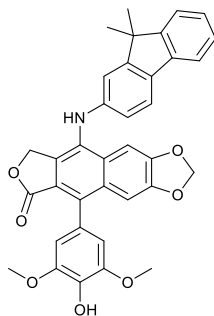

Compound **6b** was synthesized according to general procedure 3.7 starting from compound **4** and 9,9-dimethyl-9H-fluoren-3-amine. Compound **6b** was obtained in 55% yield (161.8 mg) in 7h as a yellow solid.

mp: 222-224 °C.

$^1\text{H}$  NMR (600 MHz, DMSO-*d*<sub>6</sub>)  $\delta$  8.53 (s, 1H), 8.43 (s, 1H), 7.64 (d,  $J = 7.5$  Hz, 1H), 7.61 (d,  $J = 8.2$  Hz, 1H), 7.54 (s, 1H), 7.46 (d,  $J = 7.4$  Hz, 1H), 7.27 (td,  $J = 7.5, 0.9$  Hz, 1H), 7.19 (td,  $J = 7.4, 0.9$  Hz, 1H), 7.03 (s, 1H), 6.93 (d,  $J = 2.0$  Hz, 1H), 6.66 (dd,  $J = 8.2, 2.1$  Hz, 1H), 6.60 (s, 2H), 6.17 (s, 2H), 5.10 (s, 2H), 3.75 (s, 6H), 1.40 (s, 6H).

$^{13}\text{C}$  NMR (151 MHz, DMSO-*d*<sub>6</sub>)  $\delta$  169.3, 154.8, 152.6, 149.5, 148.3, 147.6, 144.6, 139.0, 135.5, 135.3, 133.0, 131.3, 130.6, 129.9, 129.7, 126.9, 125.6, 124.9, 122.4, 120.8, 119.3, 118.7, 114.1, 109.5, 107.8, 103.3, 102.2, 99.7, 67.4, 56.1, 46.2, 27.0.

IR (KBr,  $\text{cm}^{-1}$ ) 2973, 2906, 1766, 1674, 1614, 1522, 1487, 1458, 1246, 1218, 1116, 1034.

HRMS (ESI)  $m/z$  calcd for  $\text{C}_{36}\text{H}_{30}\text{NO}_7^+$  (M+H)<sup>+</sup> 588.2023, found 588.2017.

9-phenyl-5-(3,4,5-trimethoxyphenyl)furo[3',4':6,7]naphtho[2,3-d][1,3]dioxol-6(8H)-one (**8a**)

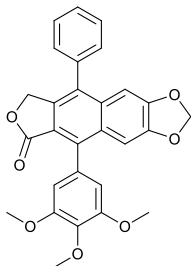

Compound **8a** was synthesized according to general procedure 3.8 starting from compound **2i**. Compound **8a** was obtained in 37% (92% brsm) yield (86.8 mg) in 1h as a yellow solid.

mp: 285-287 °C



**<sup>1</sup>H NMR (600 MHz, CDCl<sub>3</sub>)** δ 7.57 (t, *J* = 7.4 Hz, 2H), 7.51 (t, *J* = 7.4 Hz, 1H), 7.38 (d, *J* = 7.4 Hz, 2H), 7.17 (s, 1H), 7.05 (s, 1H), 6.60 (s, 2H), 6.05 (s, 2H), 5.13 (s, 2H), 3.98 (s, 3H), 3.86 (s, 6H).

**<sup>13</sup>C NMR (151 MHz, CDCl<sub>3</sub>)** δ 170.0, 153.1, 150.2, 148.5, 139.8, 138.5, 137.9, 136.4, 133.4, 132.5, 131.1, 130.6, 129.4, 129.4, 128.6, 118.5, 107.4, 104.1, 102.1, 102.0, 68.1, 61.2, 56.3.

**IR** (KBr, cm<sup>-1</sup>) 2970, 2904, 1766, 1753, 1462, 1243, 1129, 1034, 942, 859, 796, 758, 707.

**HRMS** (ESI) *m/z* calcd for C<sub>28</sub>H<sub>23</sub>O<sub>7</sub><sup>+</sup> (M+H)<sup>+</sup> 471.1438, found 471.1440.

9-(4,4,5,5-tetramethyl-1,3,2-dioxaborolan-2-yl)-5-(3,4,5-trimethoxyphenyl)furo[3',4':6,7]naphtho[2,3-d][1,3]dioxol-6(8H)-one (**8b**)

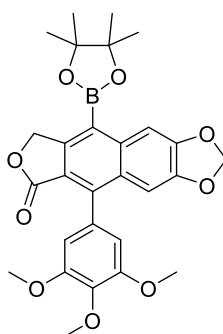

Compound **8b** was synthesized according to general procedure 3.9 starting from compound **2i**. Compound **8b** was obtained in 86% yield (223.9 mg) in 6h as a white solid.

**mp**: 285-288 °C.

**<sup>1</sup>H NMR (600 MHz, CDCl<sub>3</sub>)** δ 8.37 (s, 1H), 7.09 (s, 1H), 6.51 (s, 2H), 6.08 (s, 2H), 5.53 (s, 2H), 3.96 (s, 3H), 3.83 (s, 6H), 1.43 (s, 12H).

**<sup>13</sup>C NMR (151 MHz, CDCl<sub>3</sub>)** δ 170.2, 153.0, 150.5, 149.9, 148.0, 143.3, 139.2, 137.8, 130.8, 130.3, 118.3, 107.1, 105.1, 103.9, 101.8, 84.3, 70.7, 61.1, 56.2, 25.2.

**IR** (KBr, cm<sup>-1</sup>) 2970, 2903, 1763, 1462, 1243, 1126, 1053, 1034, 942, 815.

**HRMS** (ESI) *m/z* calcd for C<sub>28</sub>H<sub>30</sub>BO<sub>9</sub><sup>+</sup> (M+H)<sup>+</sup> 520.2014, found 520.2020.

10-(phenylethynyl)-5-(3,4,5-trimethoxyphenyl)furo[3',4':6,7]naphtho[2,3-d][1,3]dioxol-6(8H)-one (**8c**)

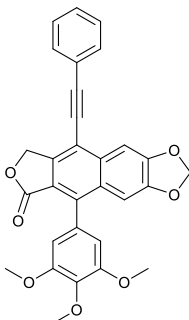

Compound **8c** was synthesized according to general procedure 3.10 starting from compound **2i**. Compound **8c** was obtained in 93% yield (229.8 mg) in 18h as a yellow solid.

**mp**: 273-275 °C.

**<sup>1</sup>H NMR (600 MHz, CDCl<sub>3</sub>)** δ 7.79 (s, 1H), 7.65 – 7.61 (m, 2H), 7.44 – 7.40 (m, 5H), 7.15 (s, 1H), 6.56 (s, 2H), 6.11 (s, 2H), 5.45 (s, 2H), 3.97 (s, 3H), 3.84 (s, 6H).

**<sup>13</sup>C NMR (151 MHz, CDCl<sub>3</sub>)** δ 169.5, 153.1, 150.9, 149.0, 143.1, 140.a, 138.0, 134.5, 131.8, 130.5, 130.0, 129.3, 128.7, 122.4, 118.7, 113.3, 107.4, 104.3, 102.3, 102.2, 100.1, 82.9, 68.2, 61.1, 56.3.

**IR** (KBr, cm<sup>-1</sup>) 2970, 2904, 1769, 1582, 1490, 1468, 1252, 1129, 1034, 942, 850, 796, 755.

**HRMS** (ESI) m/z calcd for C<sub>30</sub>H<sub>23</sub>O<sub>7</sub><sup>+</sup> (M+H)<sup>+</sup> 495.1438, found 495.1439.

9-amino-5-(3,4,5-trimethoxyphenyl)furo[3',4':6,7]naphtho[2,3-d][1,3]dioxol-6(8H)-one (**9**)

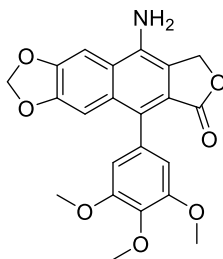

Compound **9** was synthesized according to general procedure 3.11 starting from compound **3g**. Compound **9** was obtained in 43 % yield (28.5 mg within two steps) in 3h as a white solid.

**mp:** >300 °C.

**<sup>1</sup>H NMR (600 MHz, DMSO-*d*<sub>6</sub>)** δ 7.72 (s, 1H), 6.83 (s, 1H), 6.50 (s, 2H), 6.14 (s, 2H), 5.99 (s, 2H), 5.23 (s, 2H), 3.76 (s, 3H), 3.72 (s, 6H).

**<sup>13</sup>C NMR (151 MHz, DMSO-*d*<sub>6</sub>)** δ 170.0, 152.3, 148.1, 147.8, 137.4, 136.6, 131.5, 130.5, 126.2, 121.1, 120.3, 118.7, 108.1, 102.8, 101.8, 98.7, 67.2, 60.1, 55.9.

**IR** (KBr, cm<sup>-1</sup>) 3442, 3371, 1768, 1582, 1468, 1414, 1362, 1241, 1138, 1120, 1032.

**MS** (ESI) m/z calcd for C<sub>22</sub>H<sub>19</sub>NO<sub>7</sub>Na<sup>+</sup> (M+Na)<sup>+</sup> 432.1, found 432.1.

## 5. Copies of the $^1\text{H}$ , $^{19}\text{F}$ and $^{13}\text{C}$ spectra

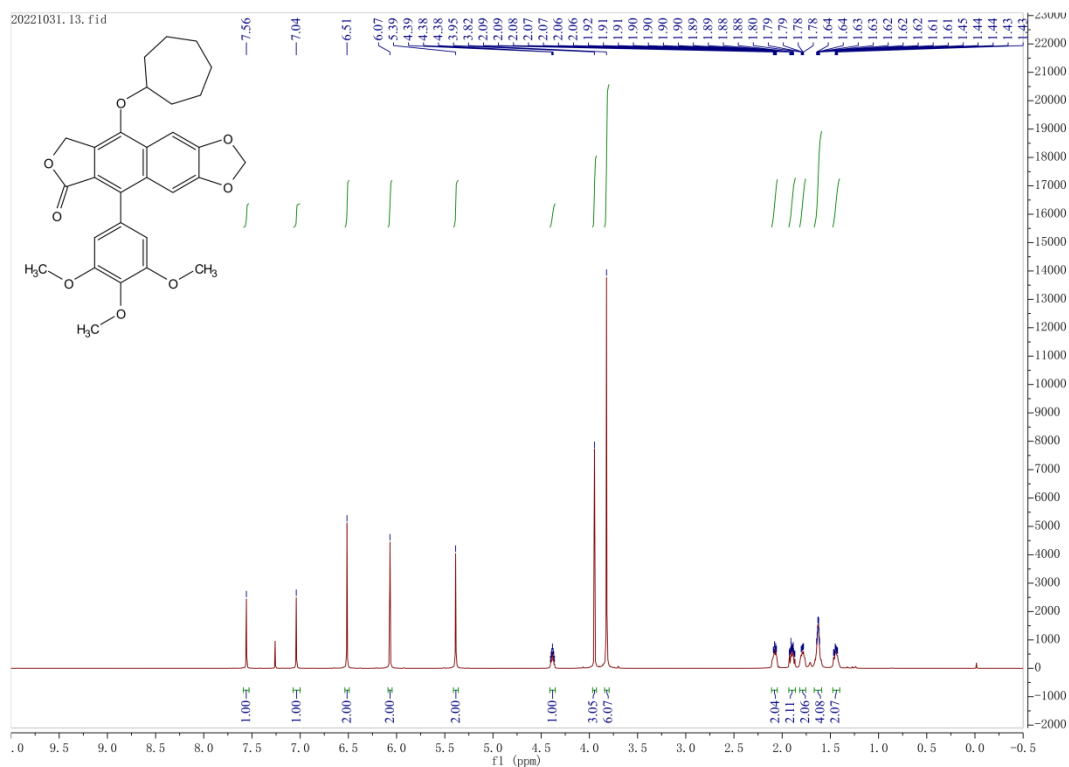

$^1\text{H}$  NMR (600 MHz,  $\text{CDCl}_3$ ) Spectrum of **2a**

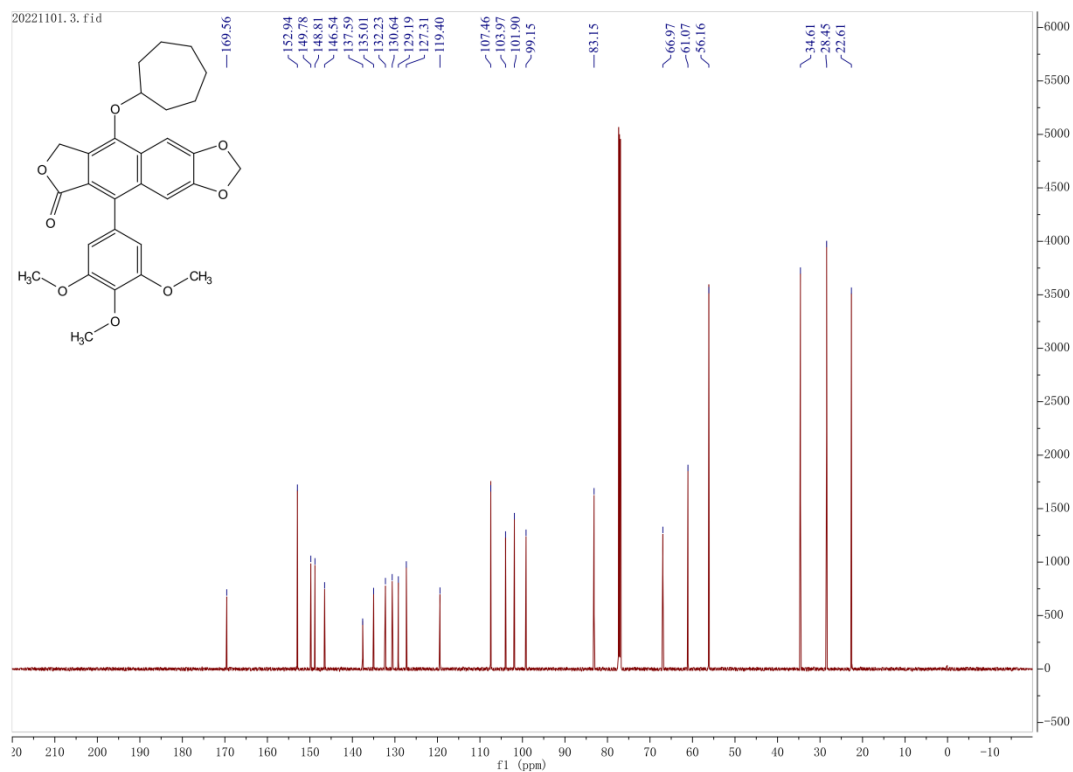

$^{13}\text{C}$  NMR (151 MHz,  $\text{CDCl}_3$ ) Spectrum of **2a**

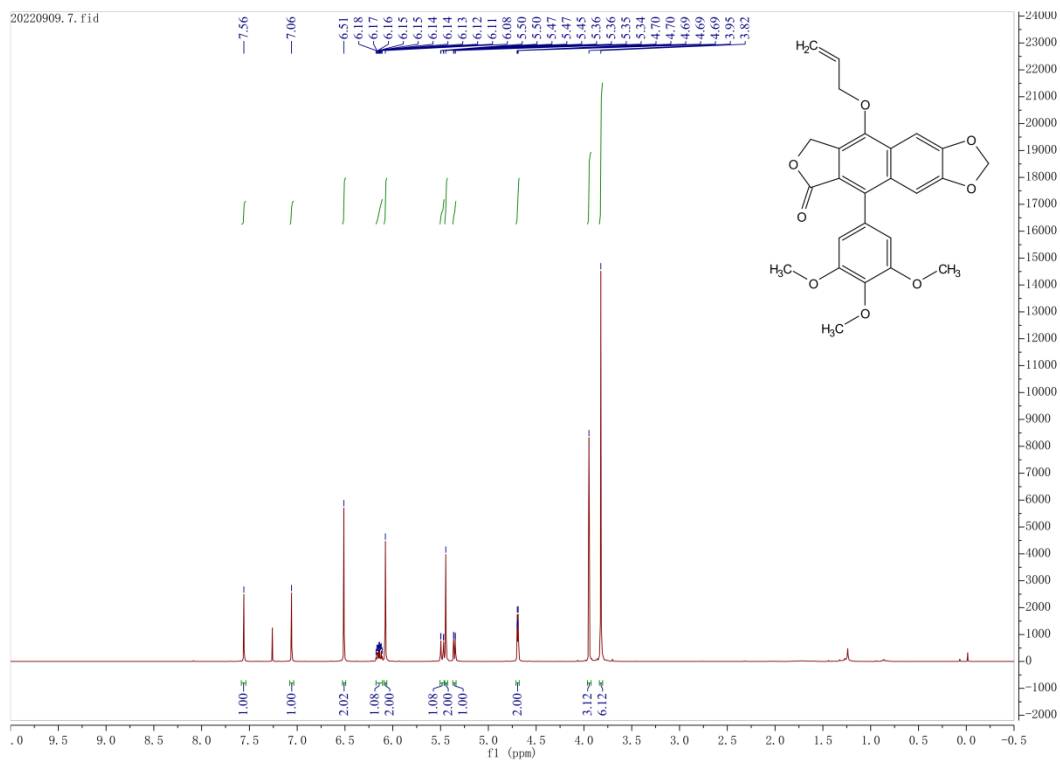

<sup>1</sup>H NMR (600 MHz, CDCl<sub>3</sub>) Spectrum of **2b**

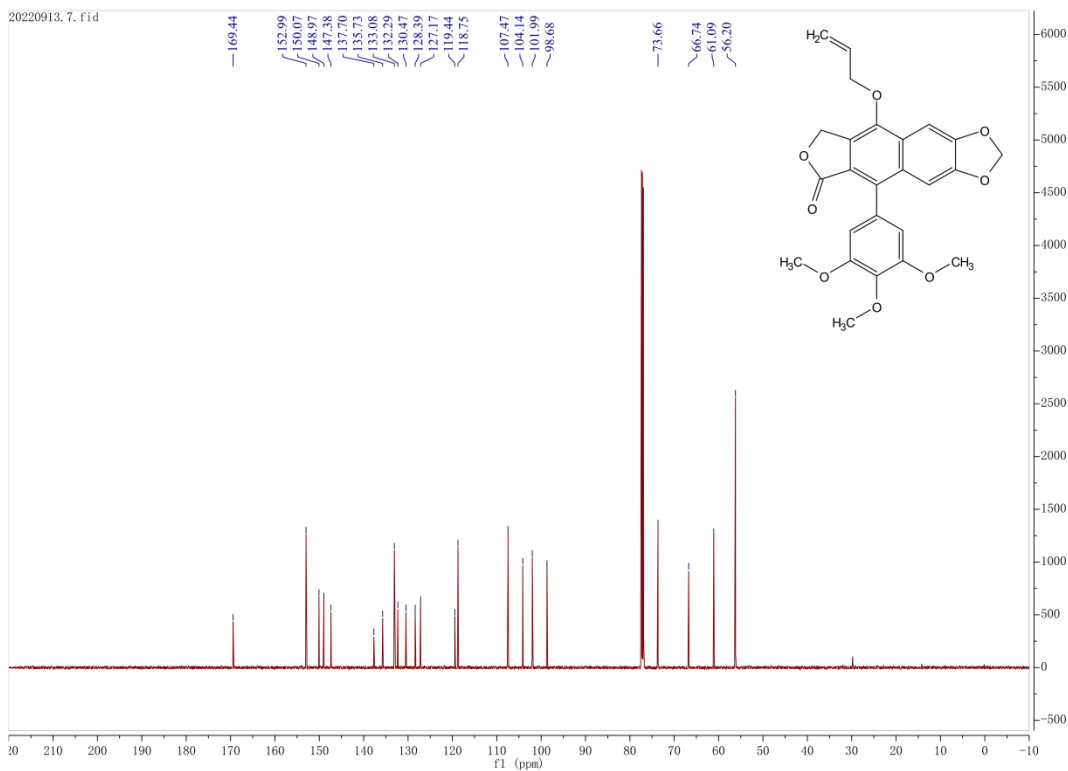

<sup>13</sup>C NMR (151 MHz, CDCl<sub>3</sub>) Spectrum of **2b**

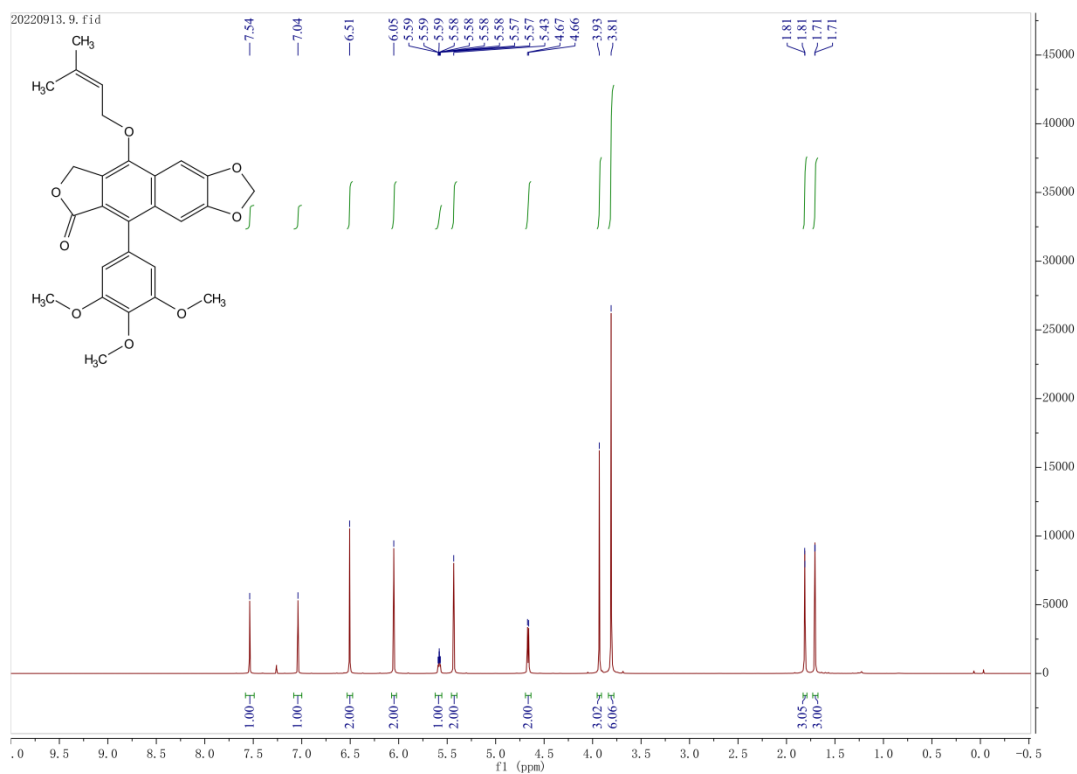

**<sup>1</sup>H NMR (600 MHz, CDCl<sub>3</sub>) Spectrum of 2c**

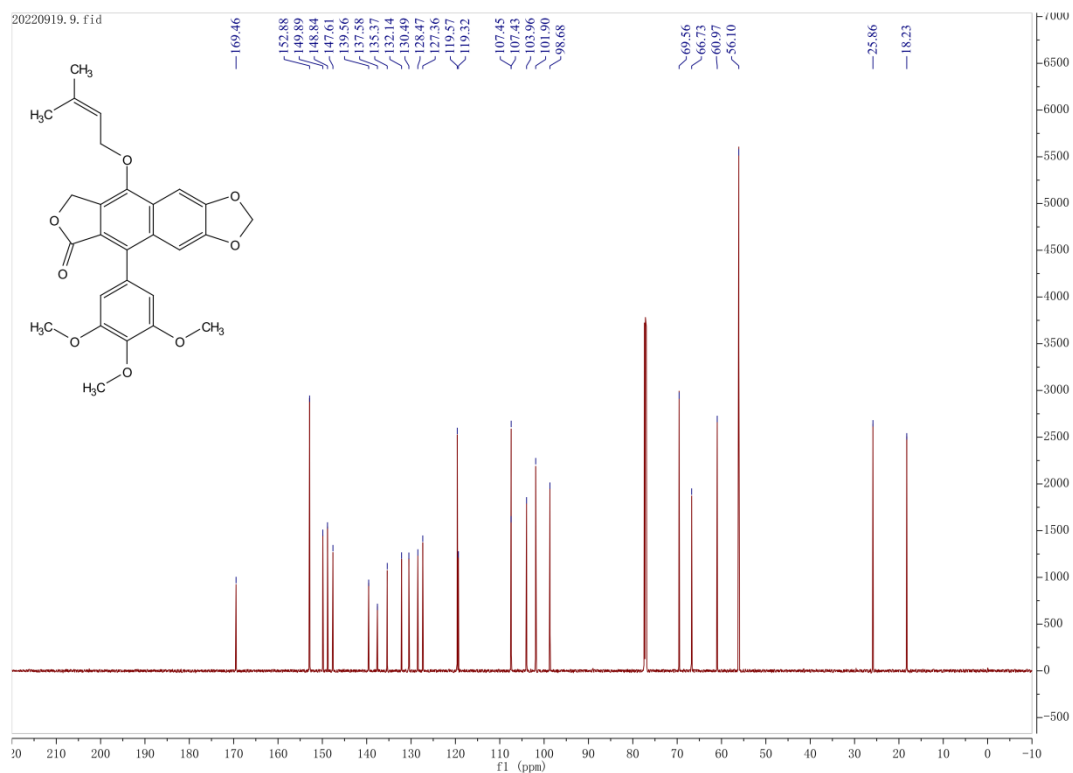

**<sup>13</sup>C NMR (151 MHz, CDCl<sub>3</sub>) Spectrum of 2c**

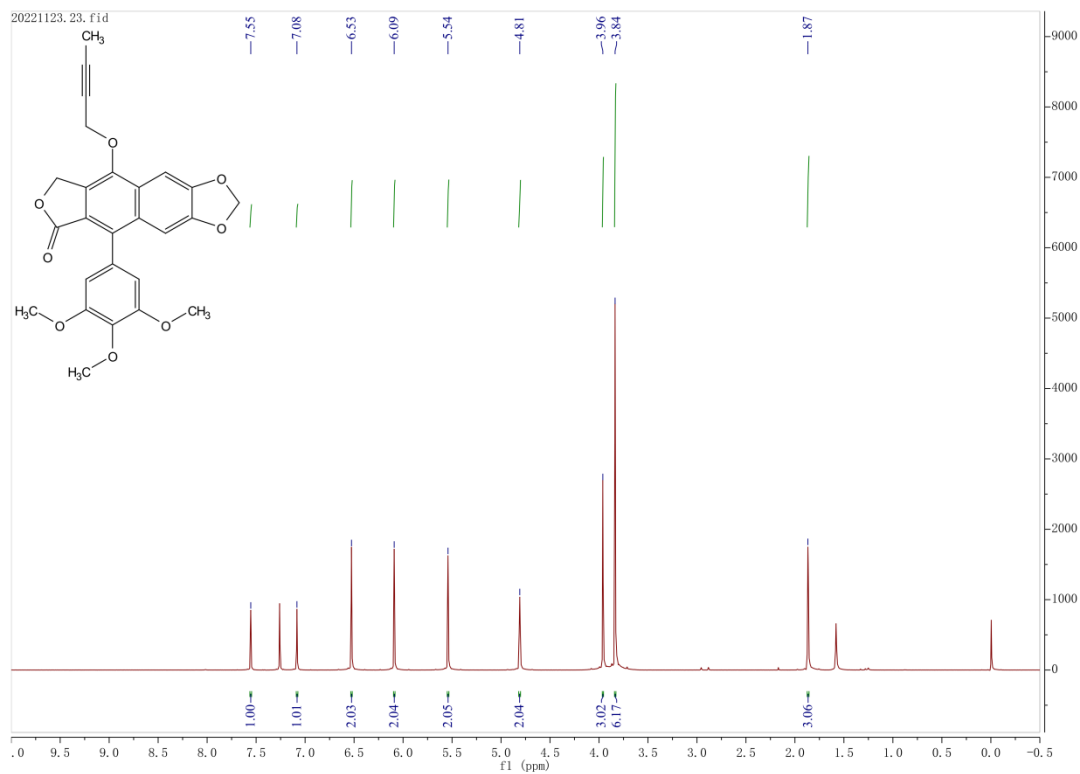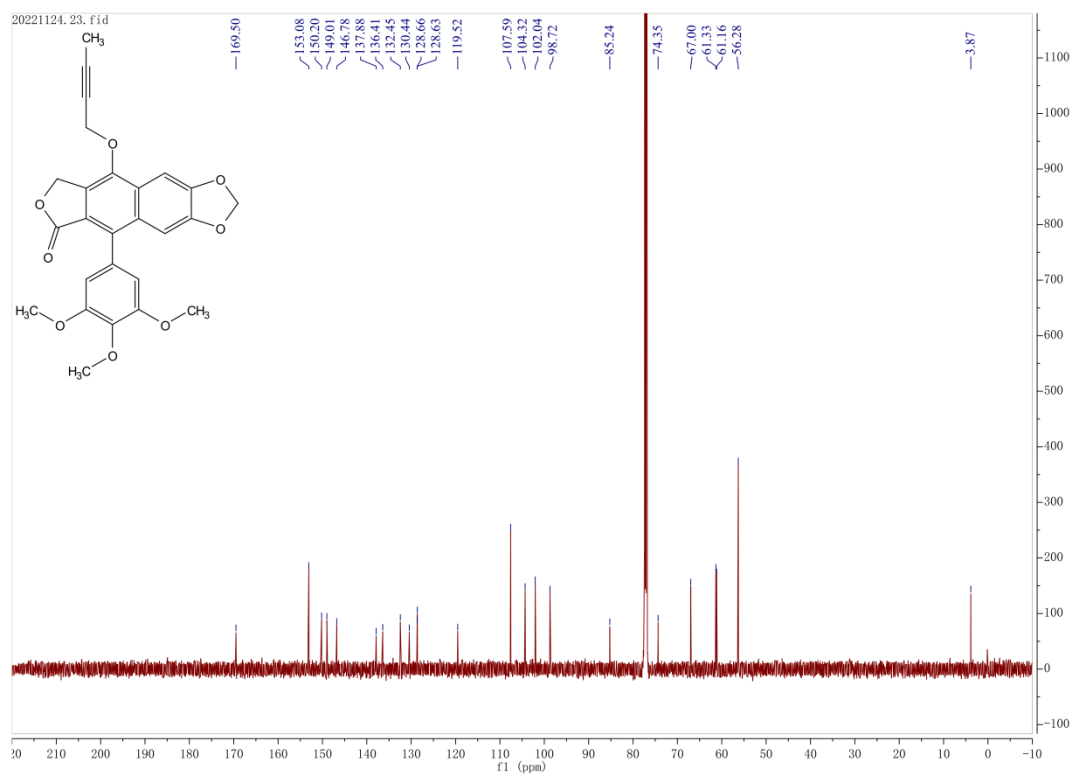

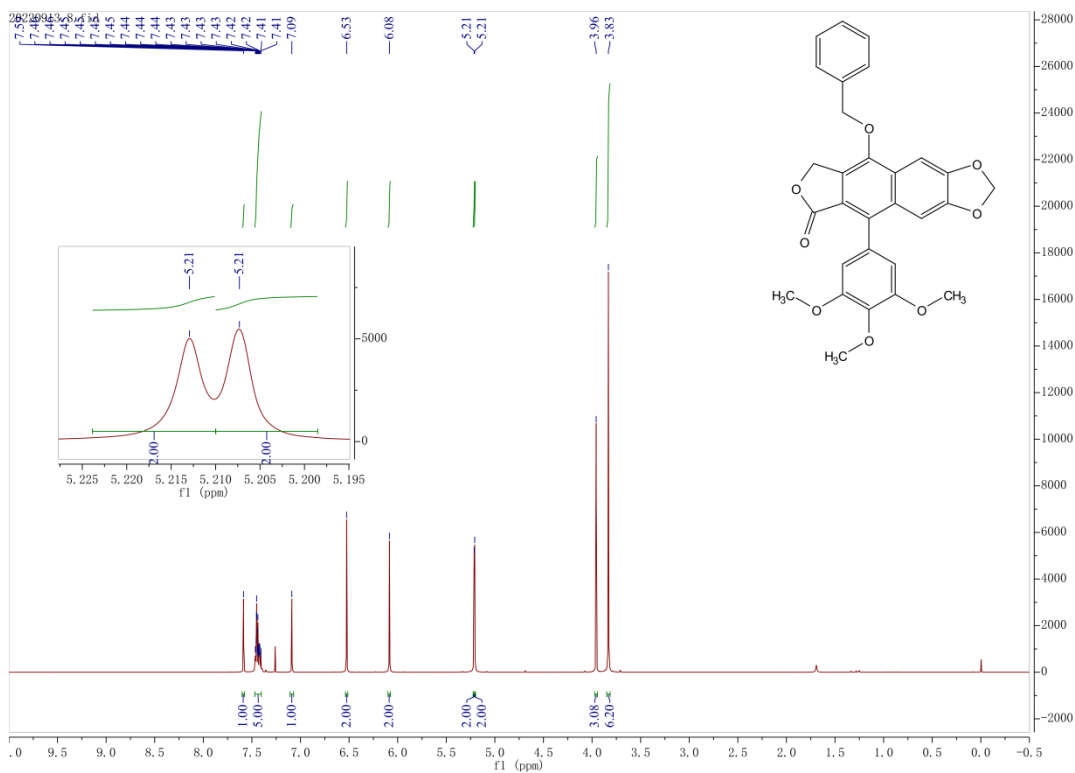

**<sup>1</sup>H NMR (600 MHz, CDCl<sub>3</sub>) Spectrum of 2e**

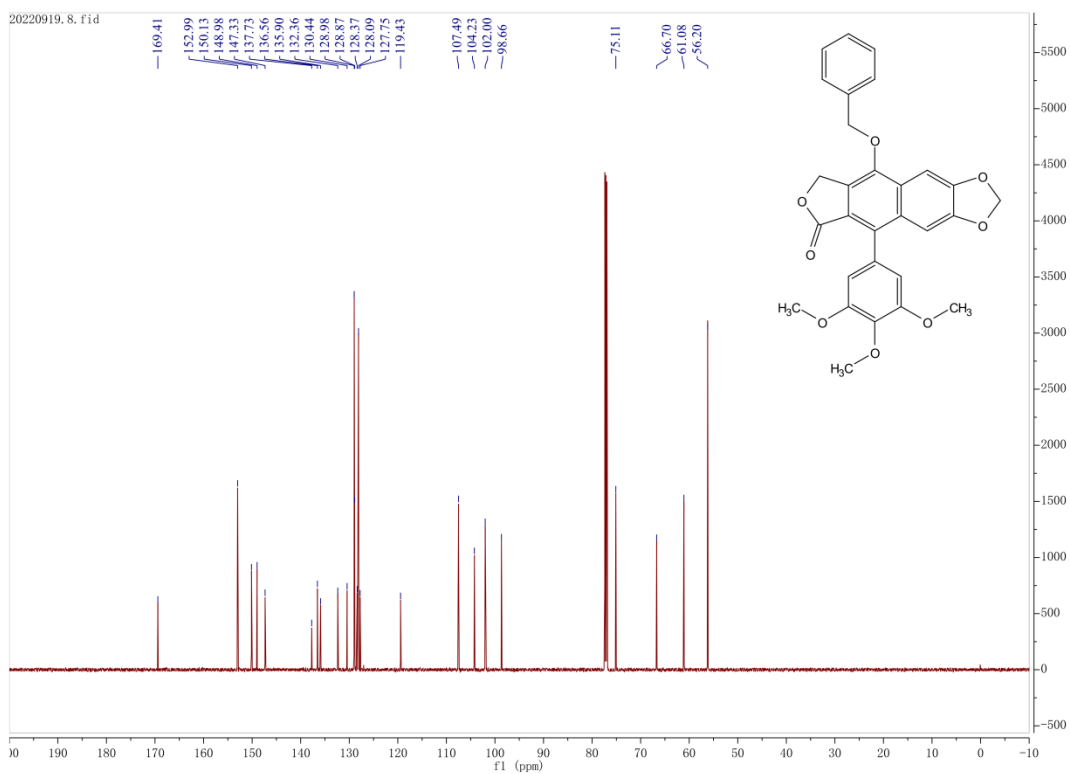

**<sup>13</sup>C NMR (151 MHz, CDCl<sub>3</sub>) Spectrum of 2e**

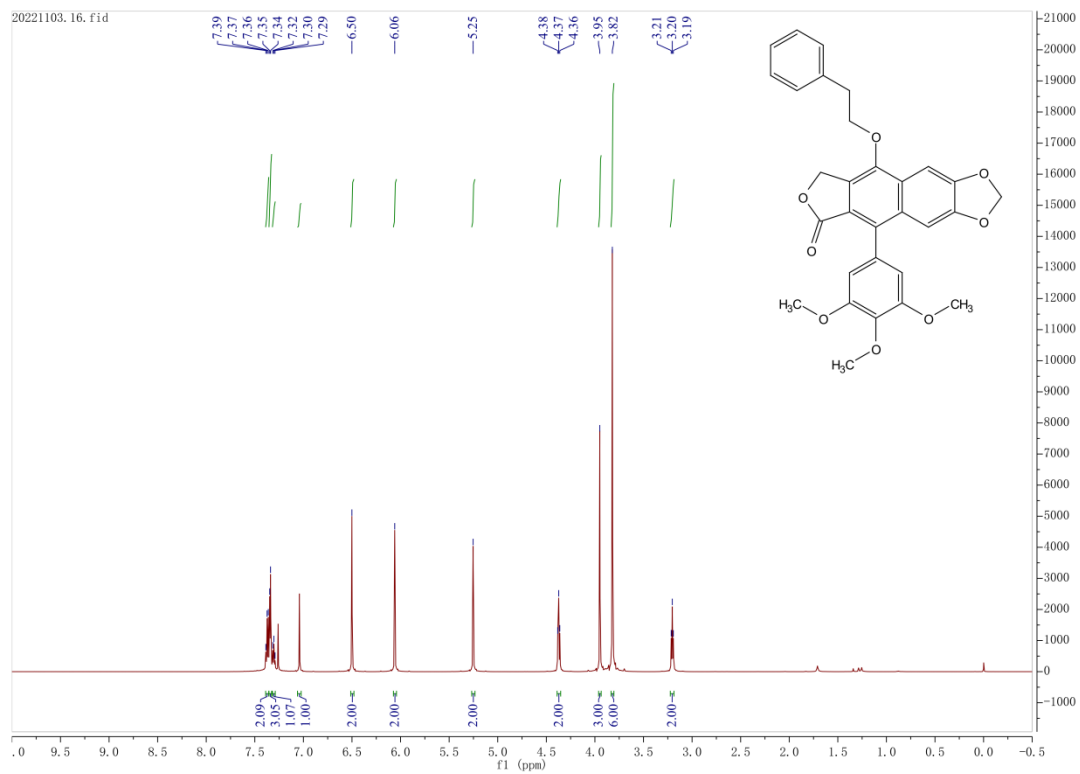

<sup>1</sup>H NMR (600 MHz, CDCl<sub>3</sub>) Spectrum of 2f

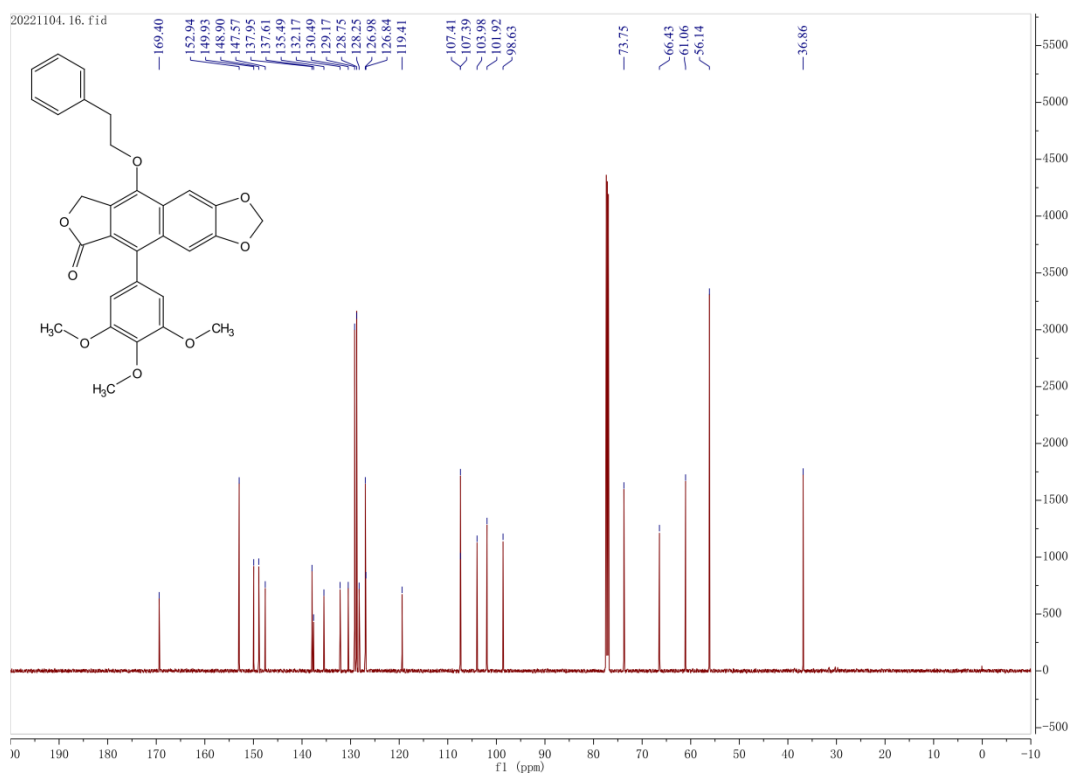

<sup>13</sup>C NMR (151 MHz, CDCl<sub>3</sub>) Spectrum of 2f



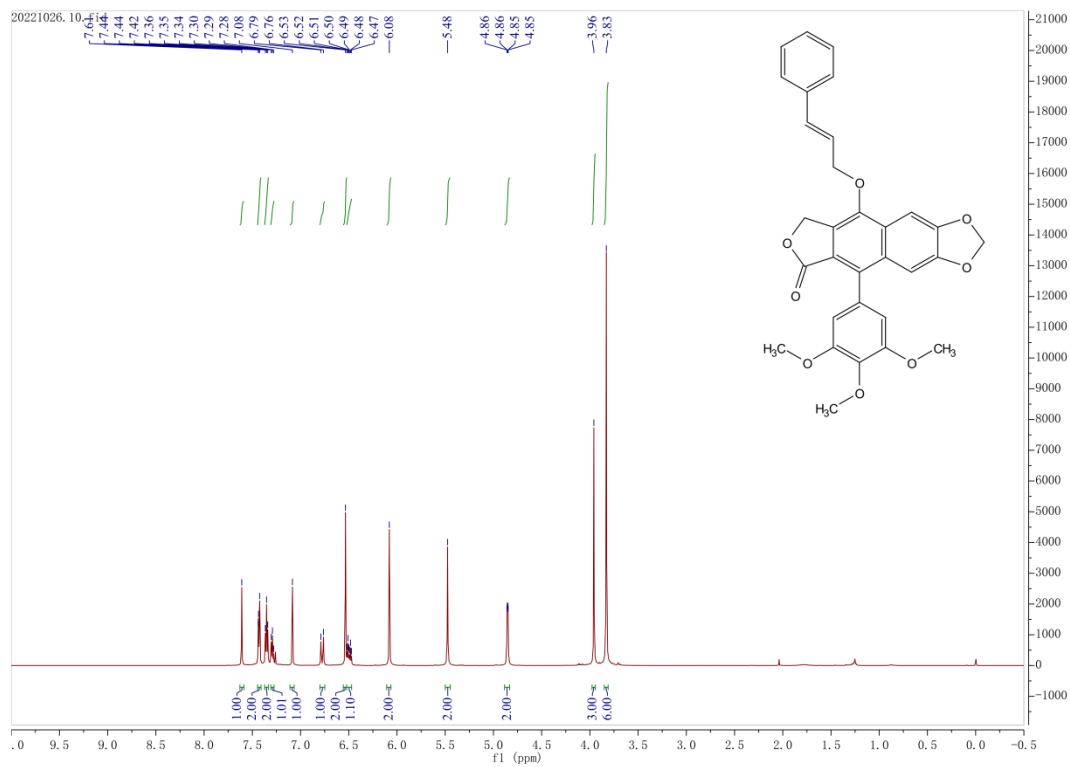

<sup>1</sup>H NMR (600 MHz, CDCl<sub>3</sub>) Spectrum of **2g**

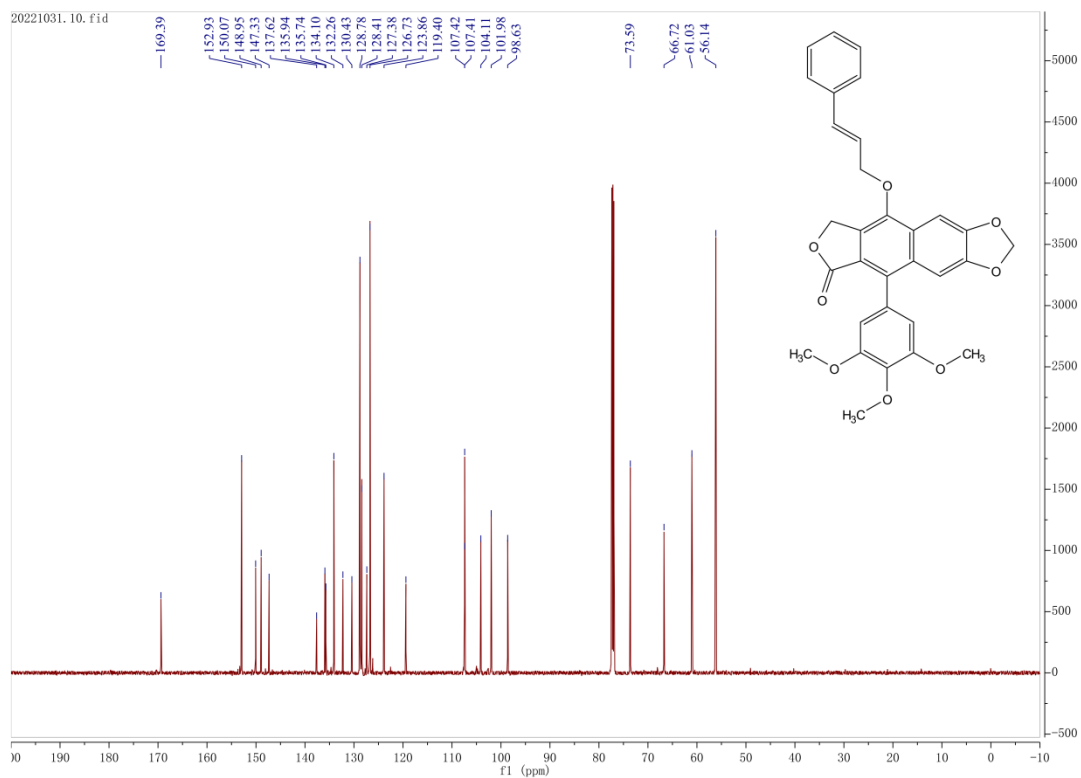

<sup>13</sup>C NMR (151 MHz, CDCl<sub>3</sub>) Spectrum of **2g**

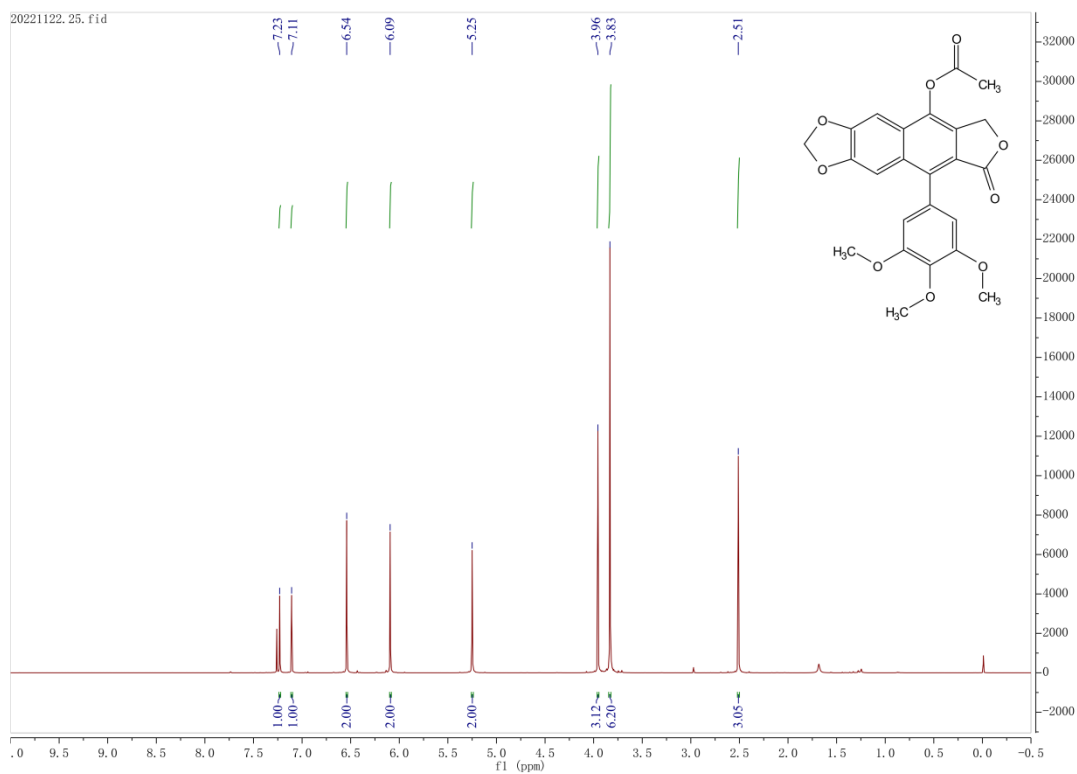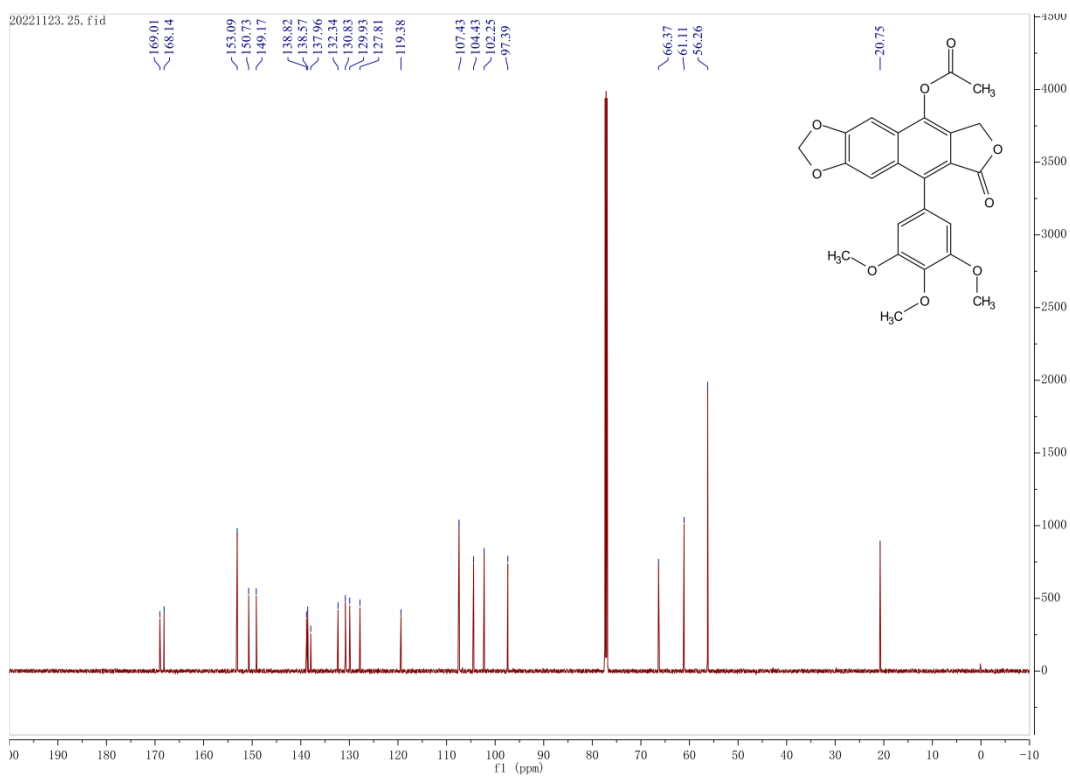

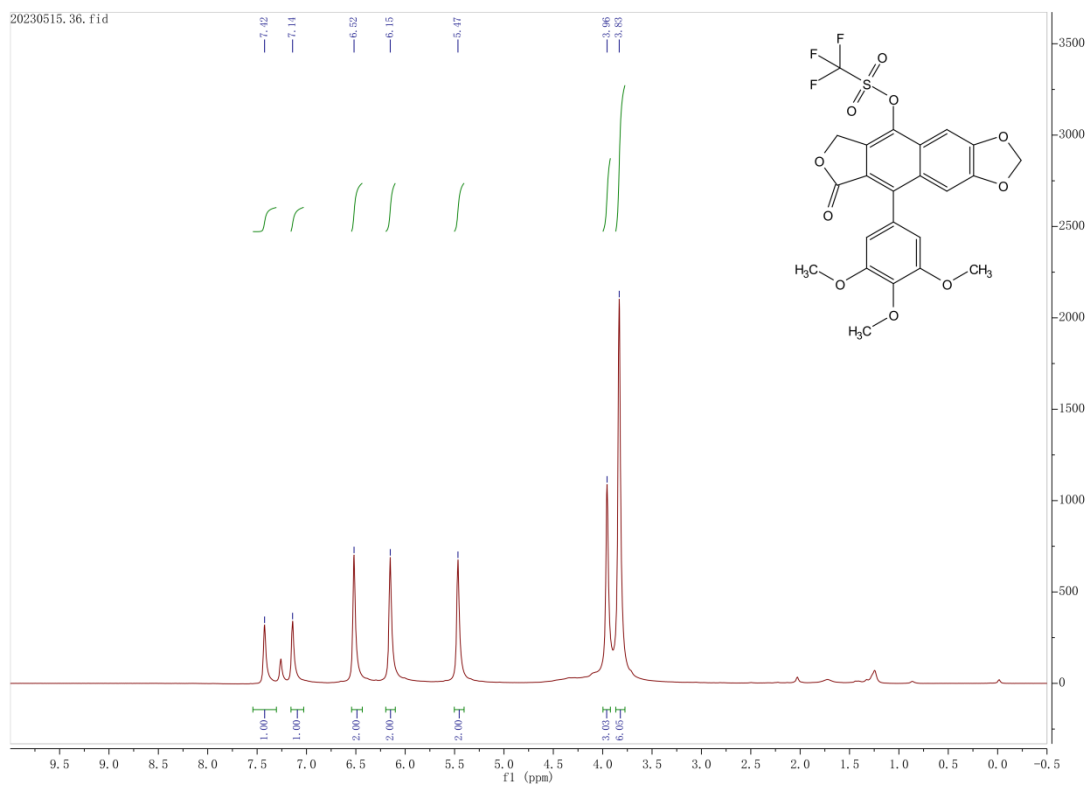

**<sup>1</sup>H NMR (600 MHz, CDCl<sub>3</sub>) Spectrum of 2i**

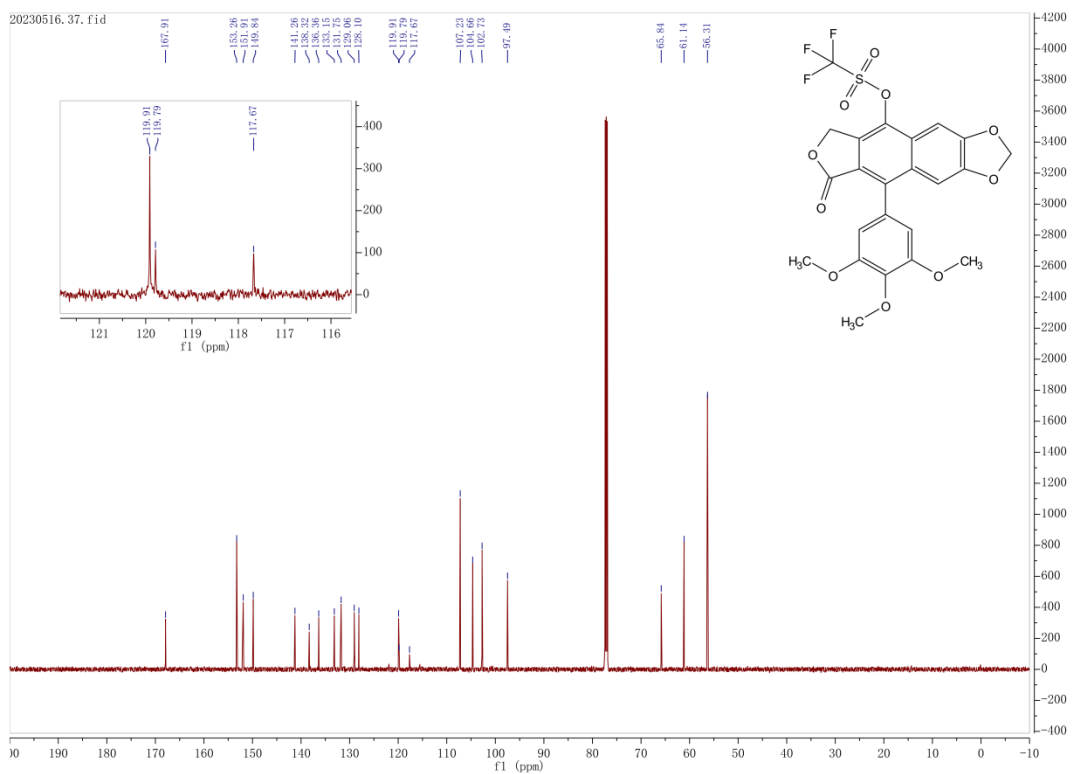

**<sup>13</sup>C NMR (151 MHz, CDCl<sub>3</sub>) Spectrum of 2i**

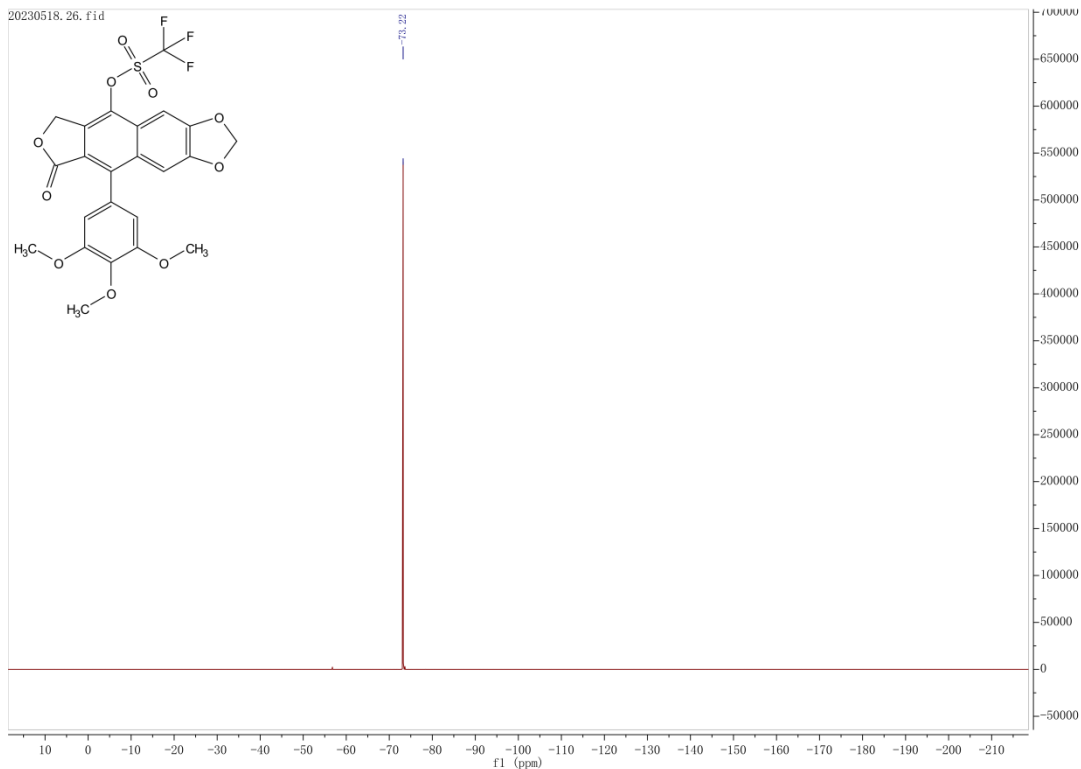

**<sup>19</sup>F NMR (565 MHz, CDCl<sub>3</sub>) Spectrum of **2i****

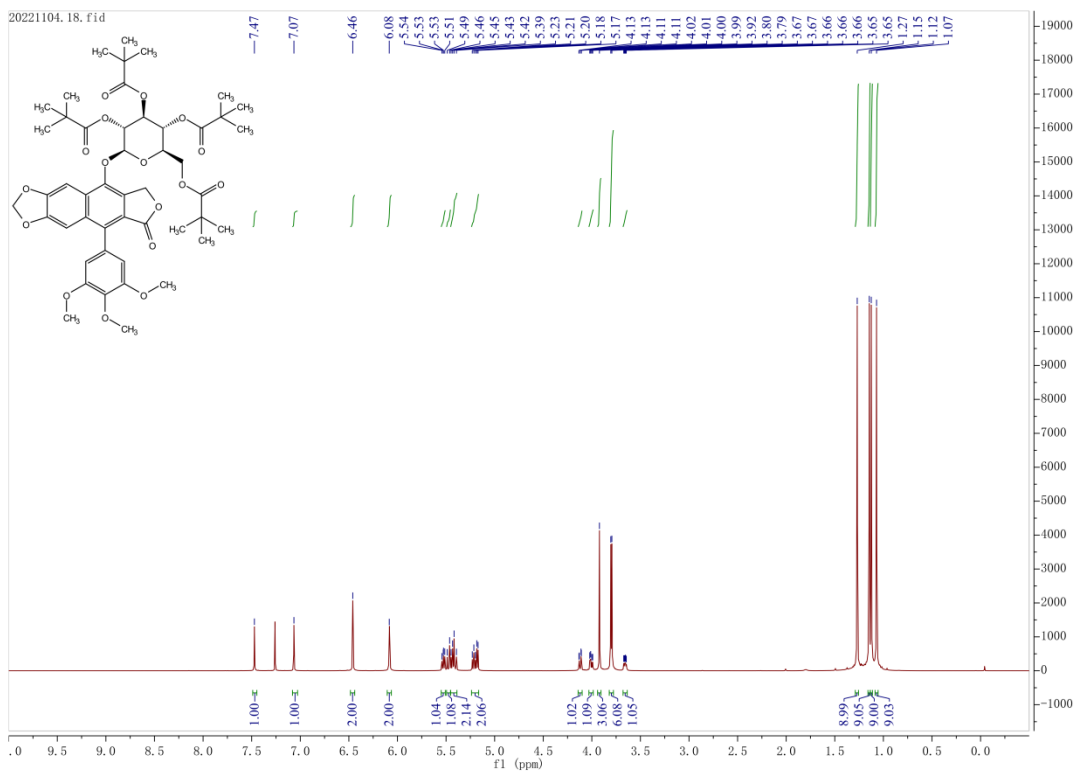

**<sup>1</sup>H NMR (600 MHz, CDCl<sub>3</sub>) Spectrum of **2j****

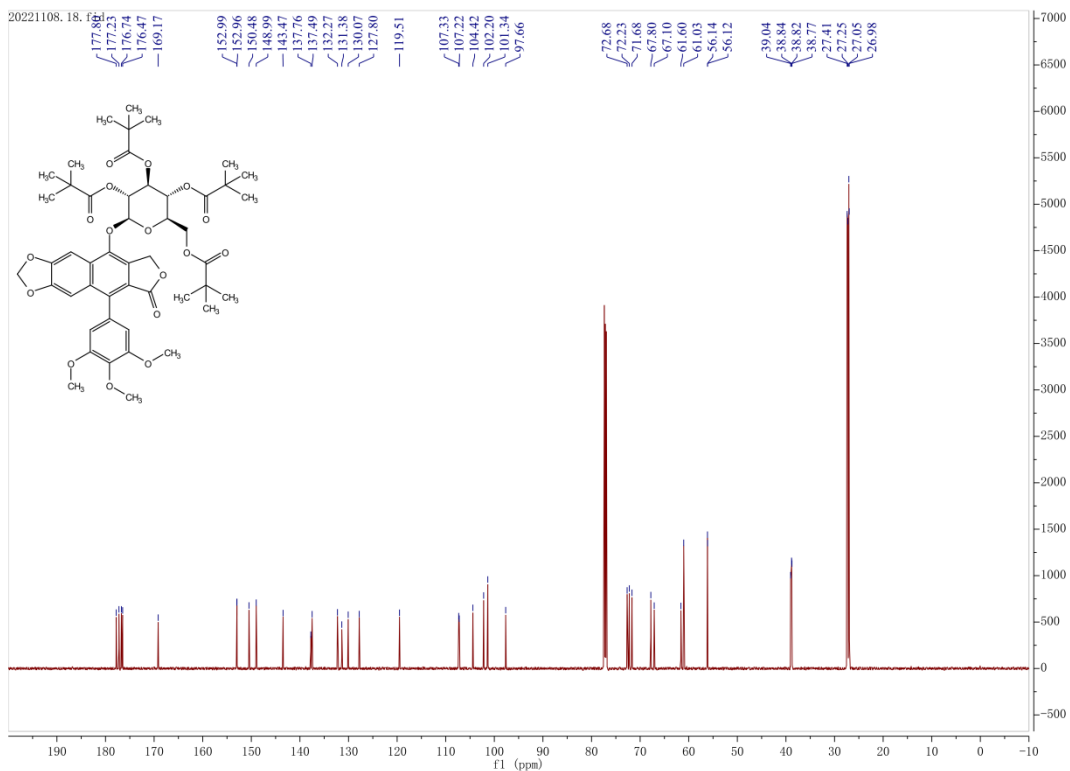

**<sup>13</sup>C NMR (151 MHz, CDCl<sub>3</sub>) Spectrum of **2j****

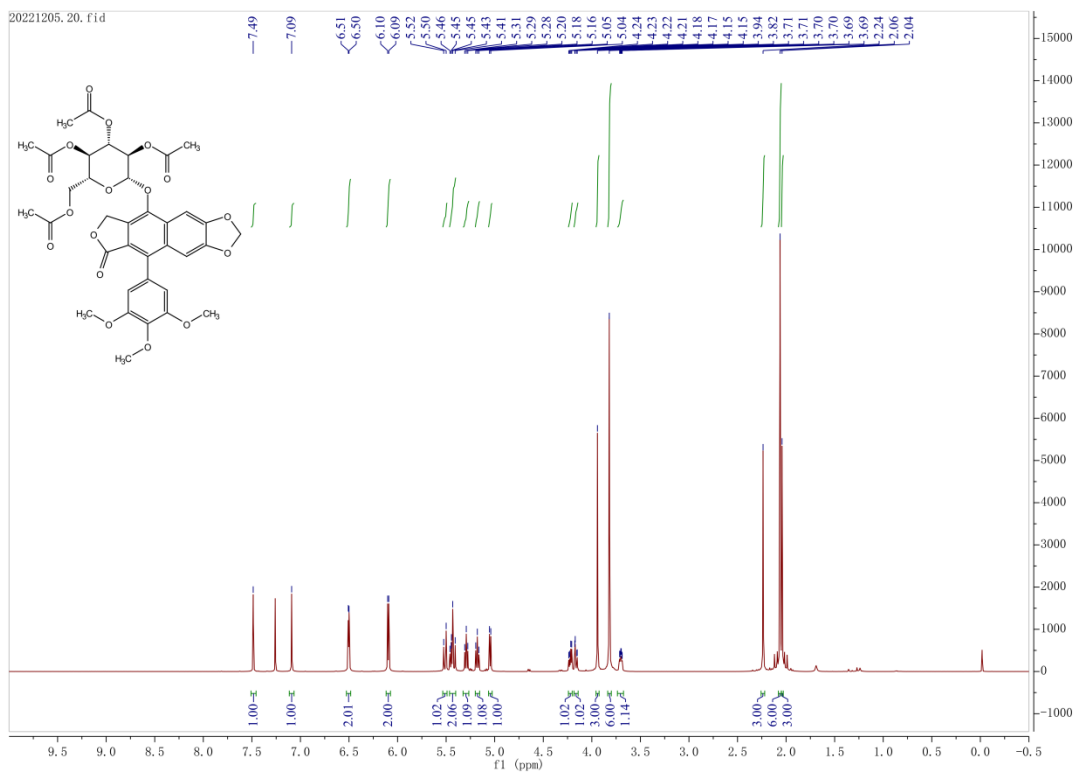

**<sup>1</sup>H NMR (600 MHz, CDCl<sub>3</sub>) Spectrum of **2k****

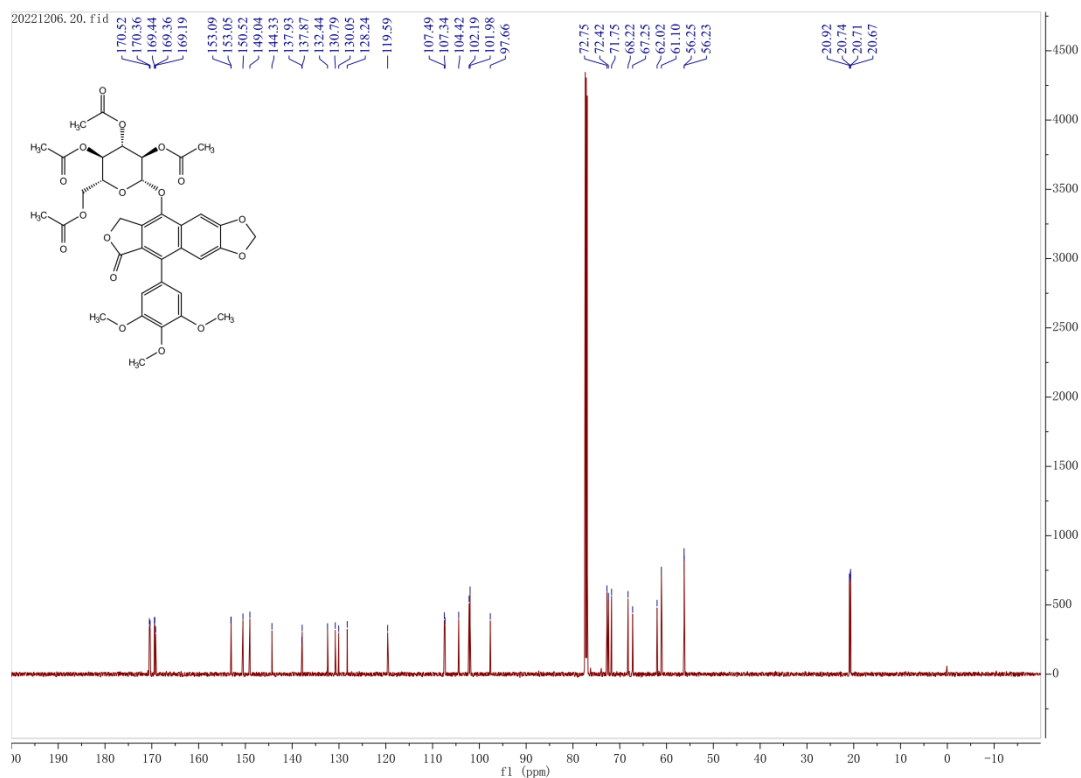

**<sup>13</sup>C NMR (151 MHz, CDCl<sub>3</sub>) Spectrum of 2k**

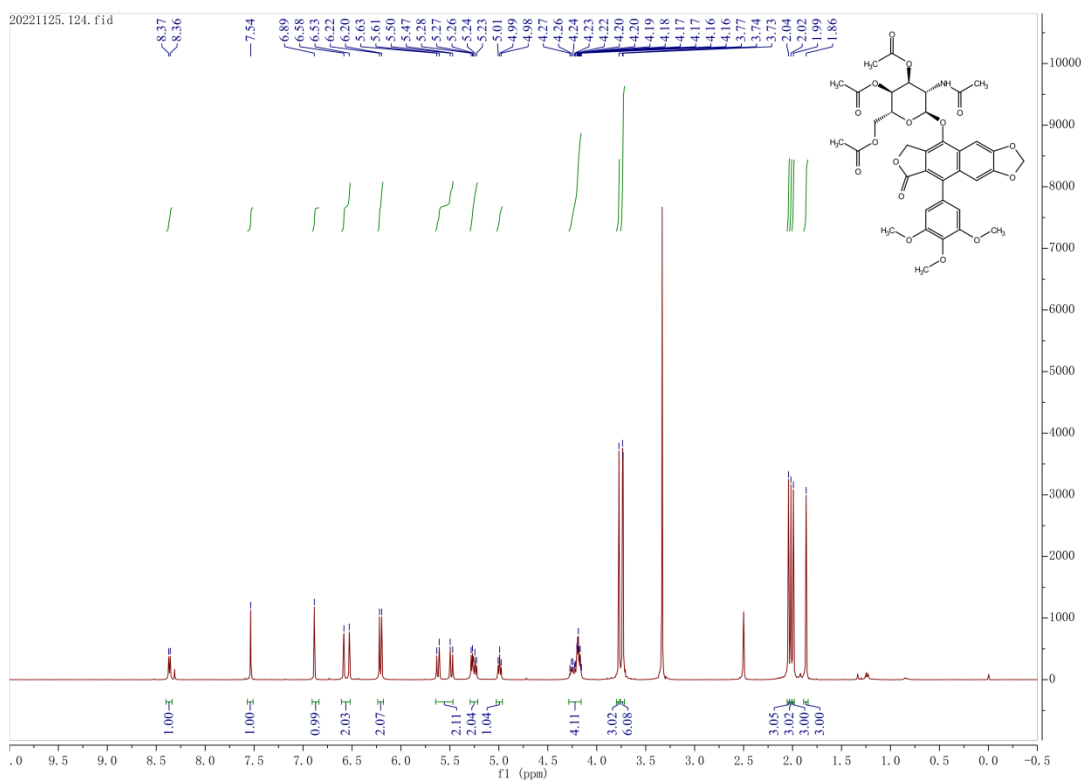

**<sup>1</sup>H NMR (600 MHz, CDCl<sub>3</sub>) Spectrum of 2l**

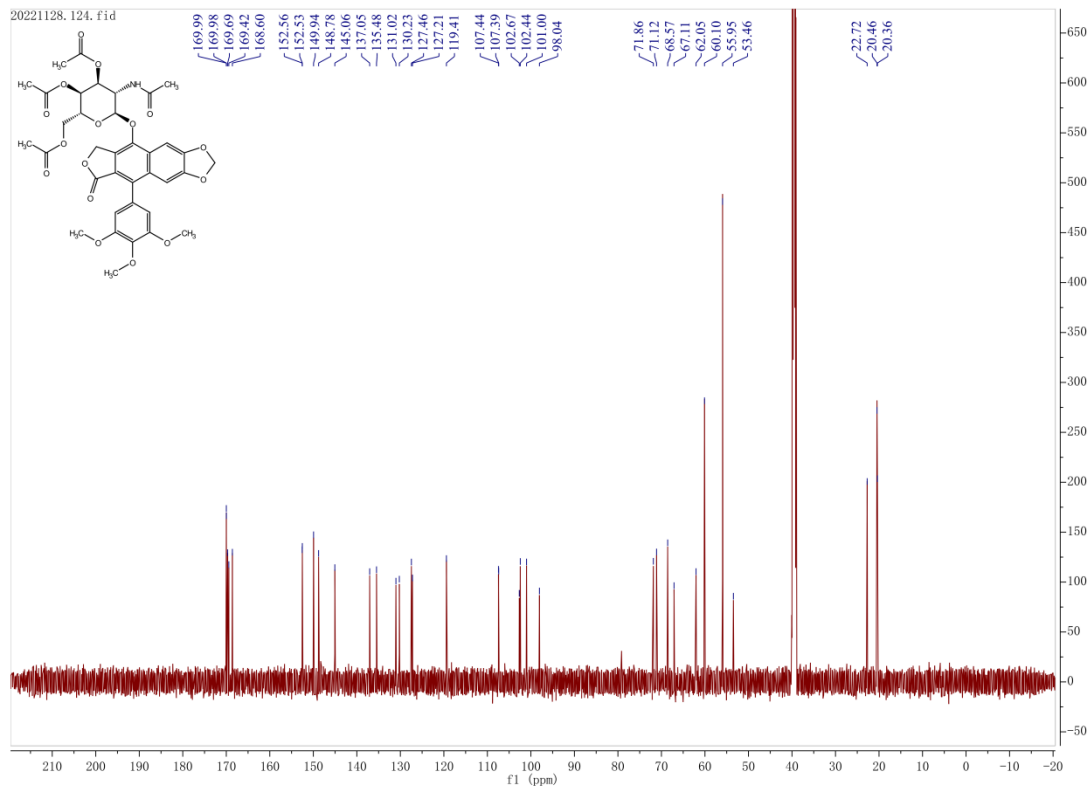

**<sup>13</sup>C NMR (151 MHz, CDCl<sub>3</sub>) Spectrum of **21****

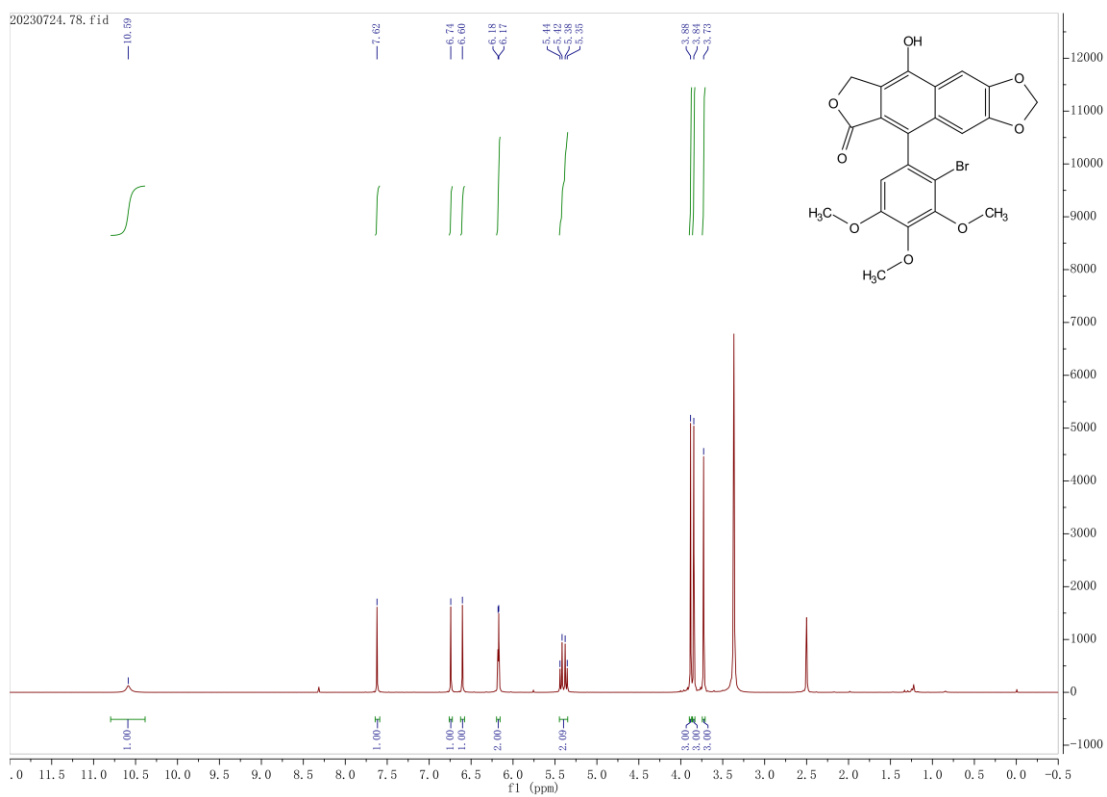

**<sup>1</sup>H NMR (600 MHz, DMSO-*d*<sub>6</sub>) Spectrum of **2m****

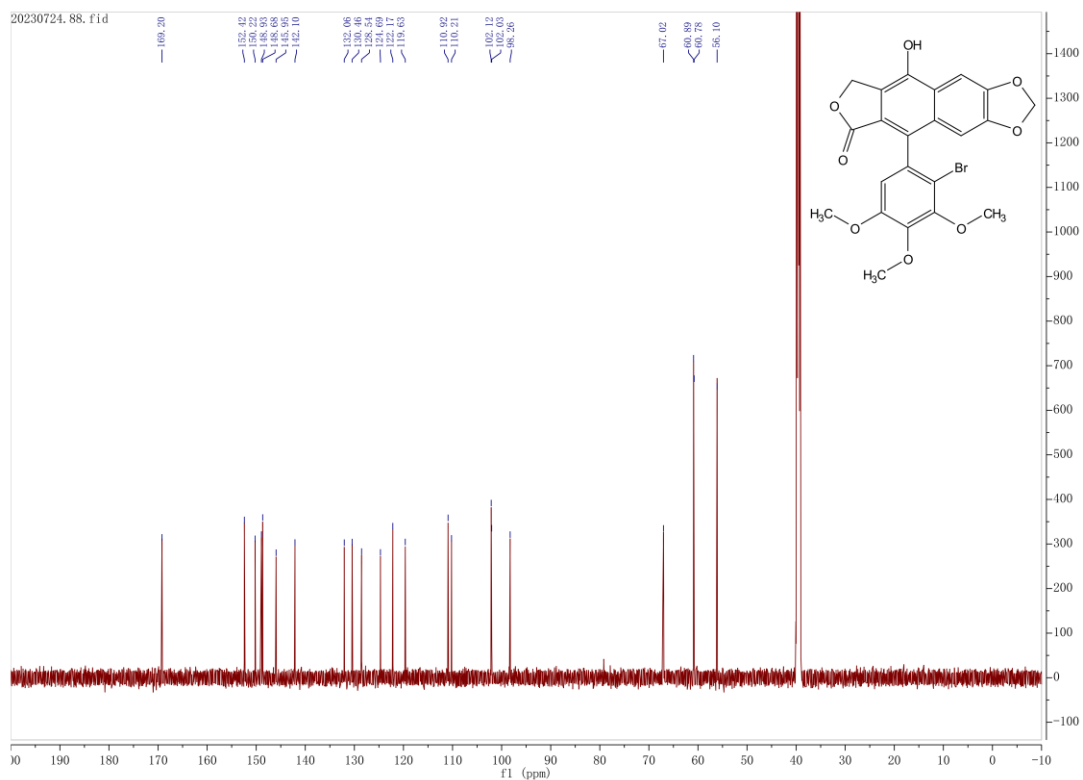

<sup>13</sup>C NMR (151 MHz, DMSO-*d*<sub>6</sub>) Spectrum of **2m**

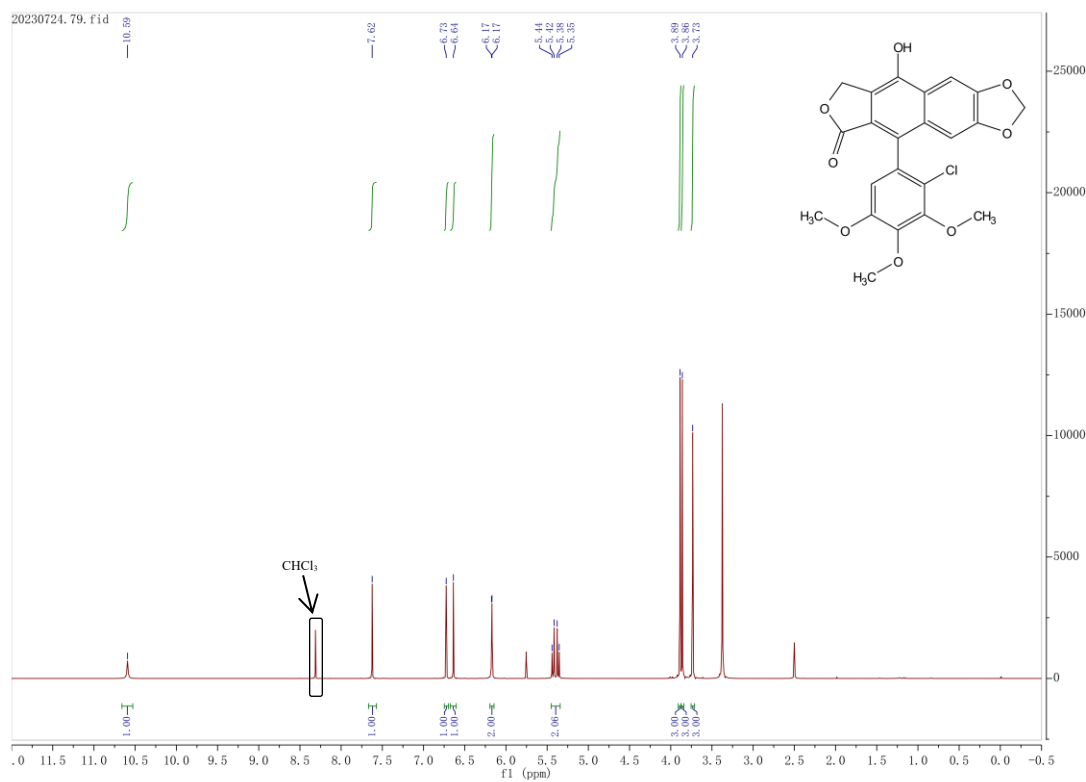

<sup>1</sup>H NMR (600 MHz, DMSO-*d*<sub>6</sub>) Spectrum of **2n**



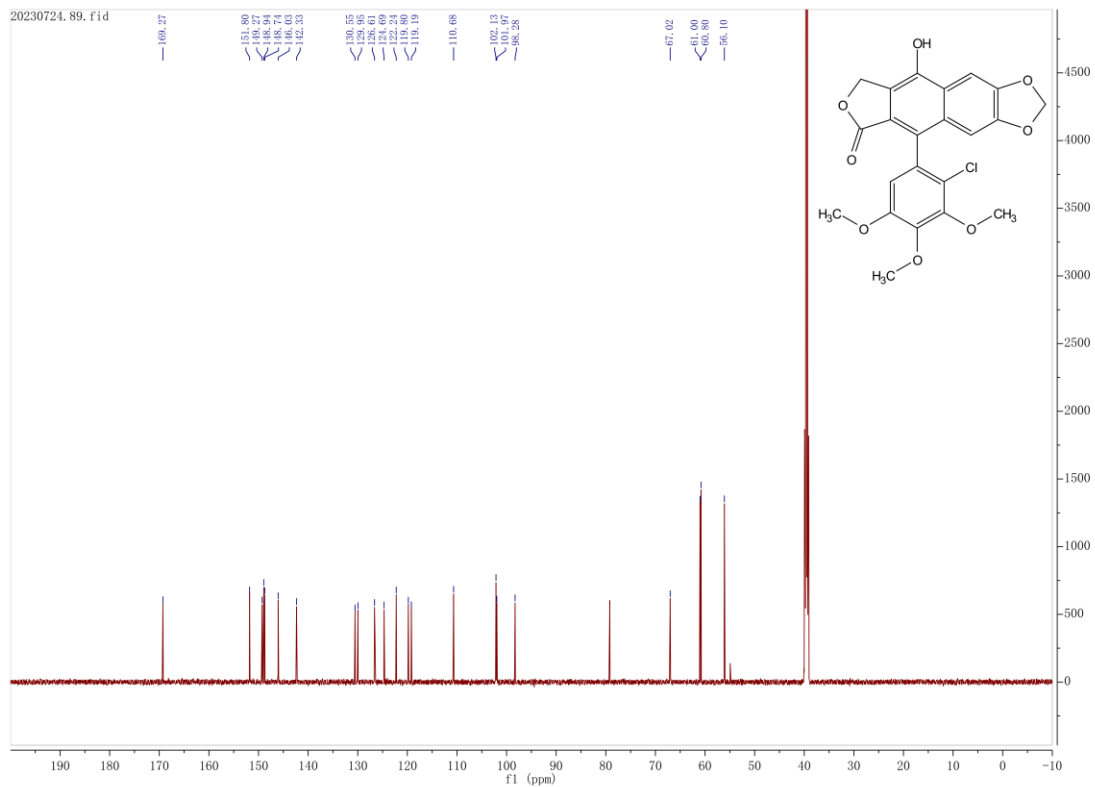

<sup>13</sup>C NMR (151 MHz, DMSO-*d*<sub>6</sub>) Spectrum of 2n

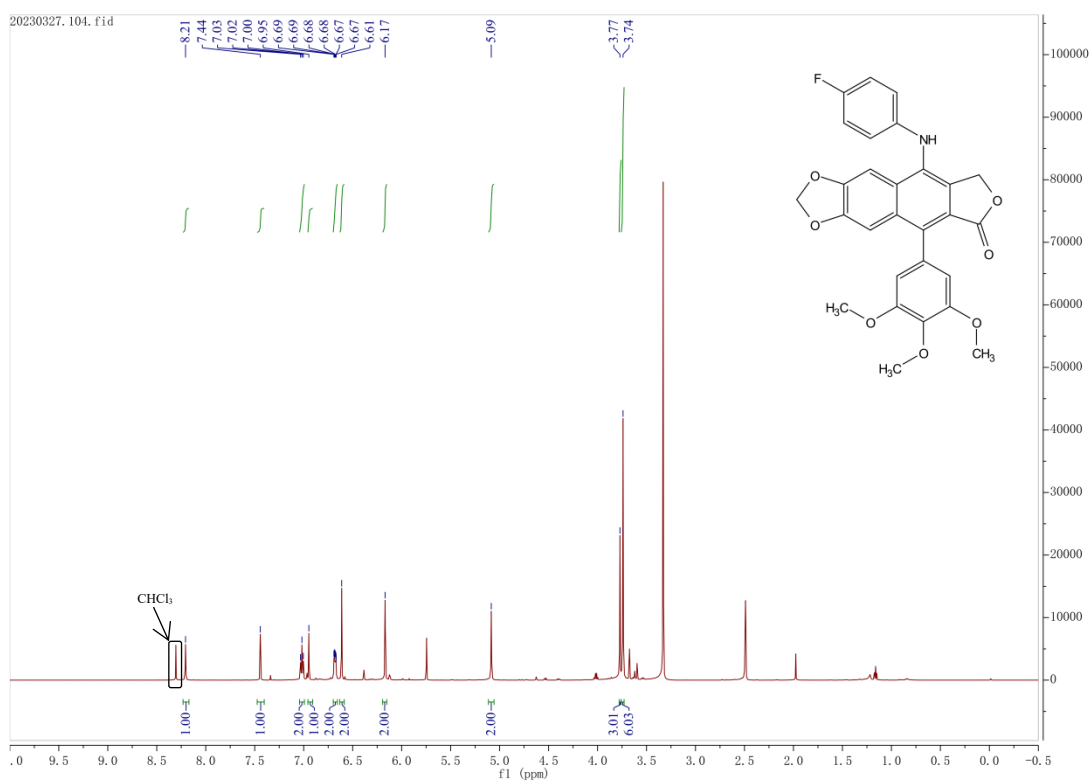

<sup>1</sup>H NMR (600 MHz, DMSO-*d*<sub>6</sub>) Spectrum of 3a

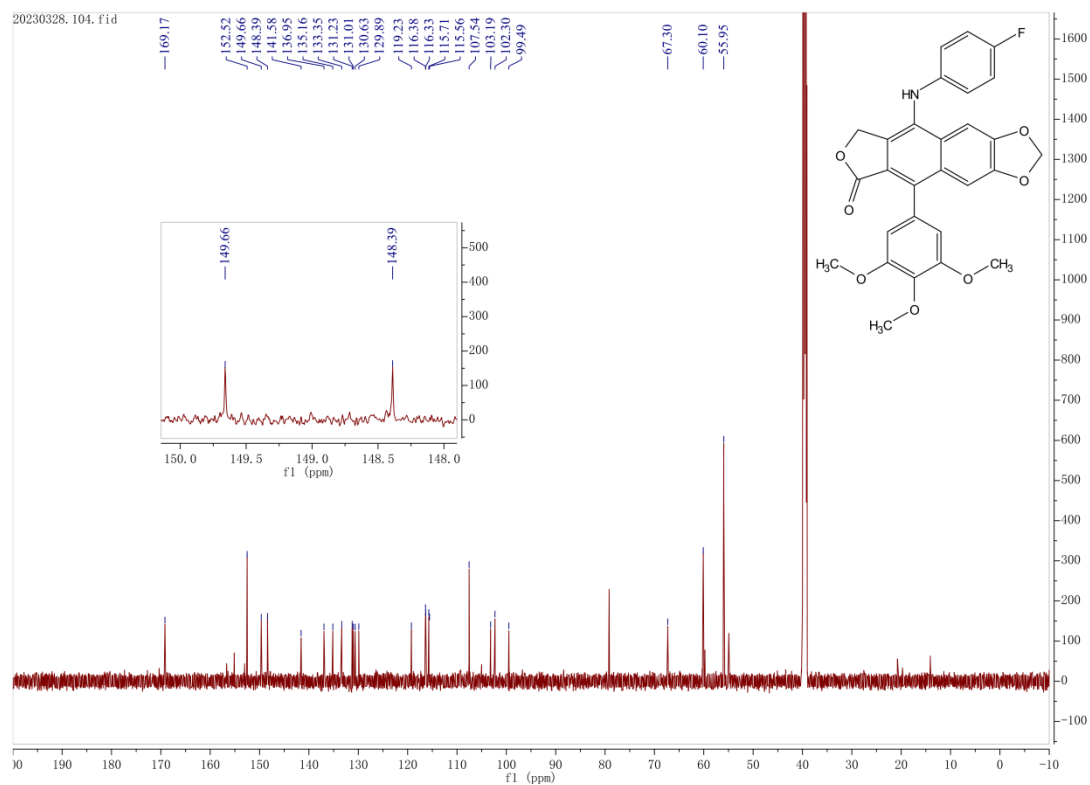

$^{13}\text{C}$  NMR (151 MHz,  $\text{DMSO-}d_6$ ) Spectrum of **3a**

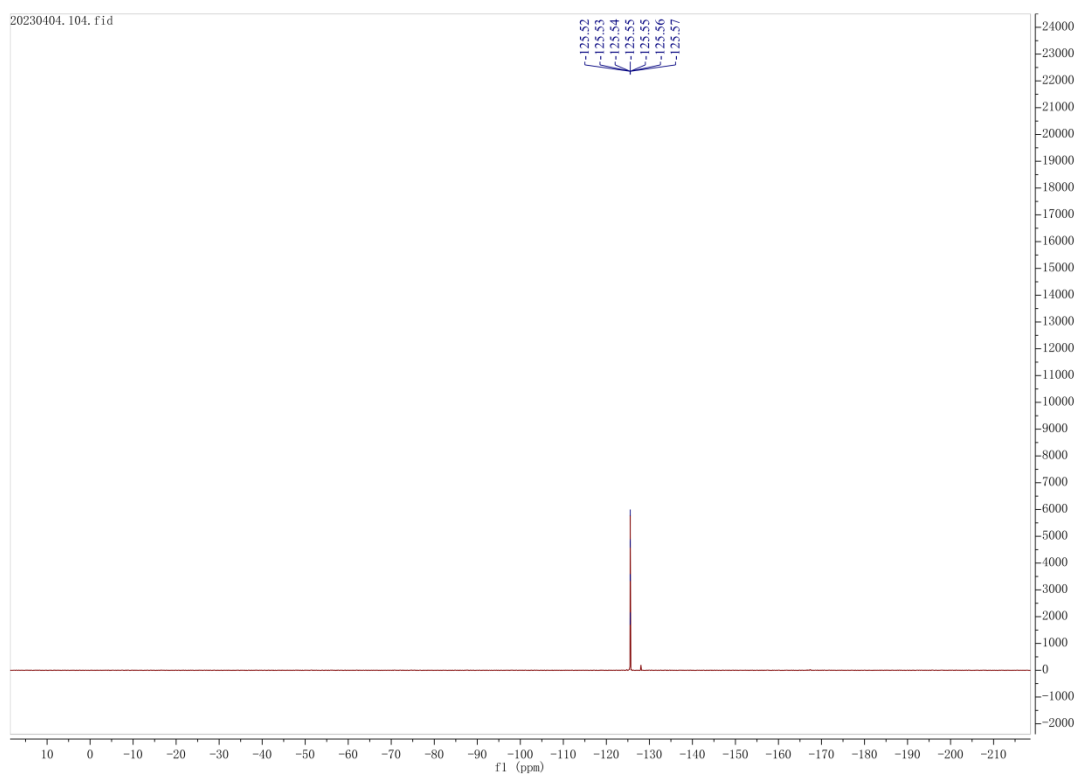

$^{19}\text{F}$  NMR (565 MHz,  $\text{DMSO-}d_6$ ) Spectrum of **3a**

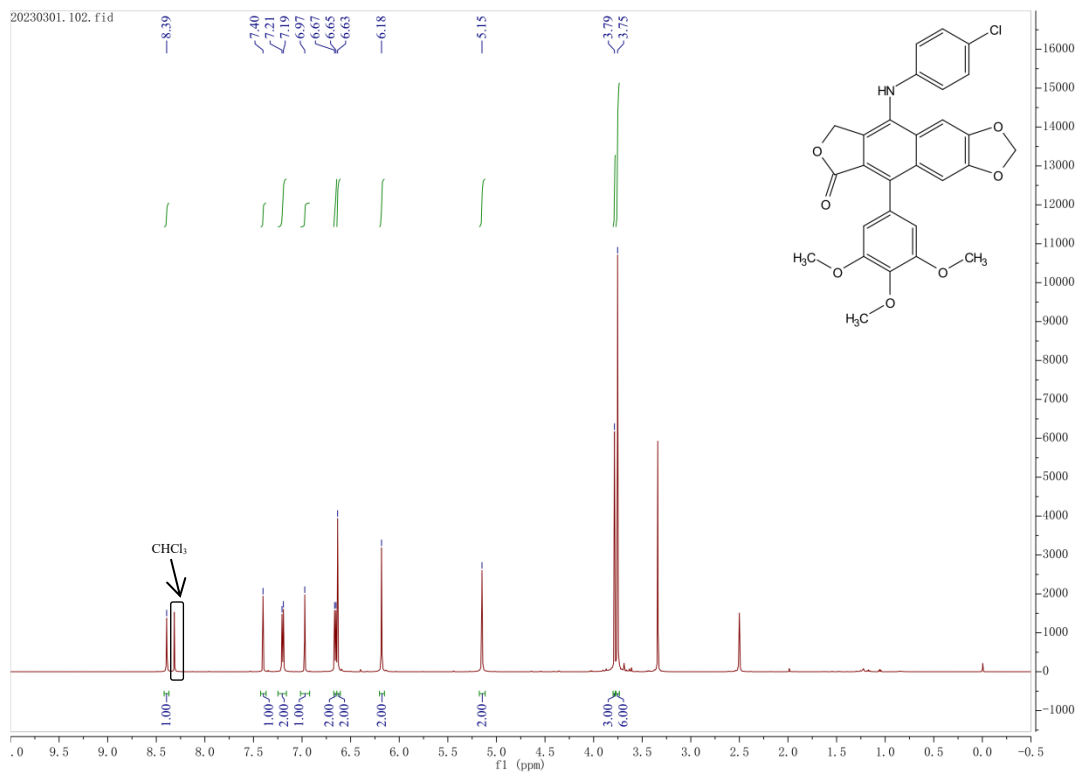

<sup>1</sup>H NMR (600 MHz, DMSO-*d*<sub>6</sub>) Spectrum of **3b**

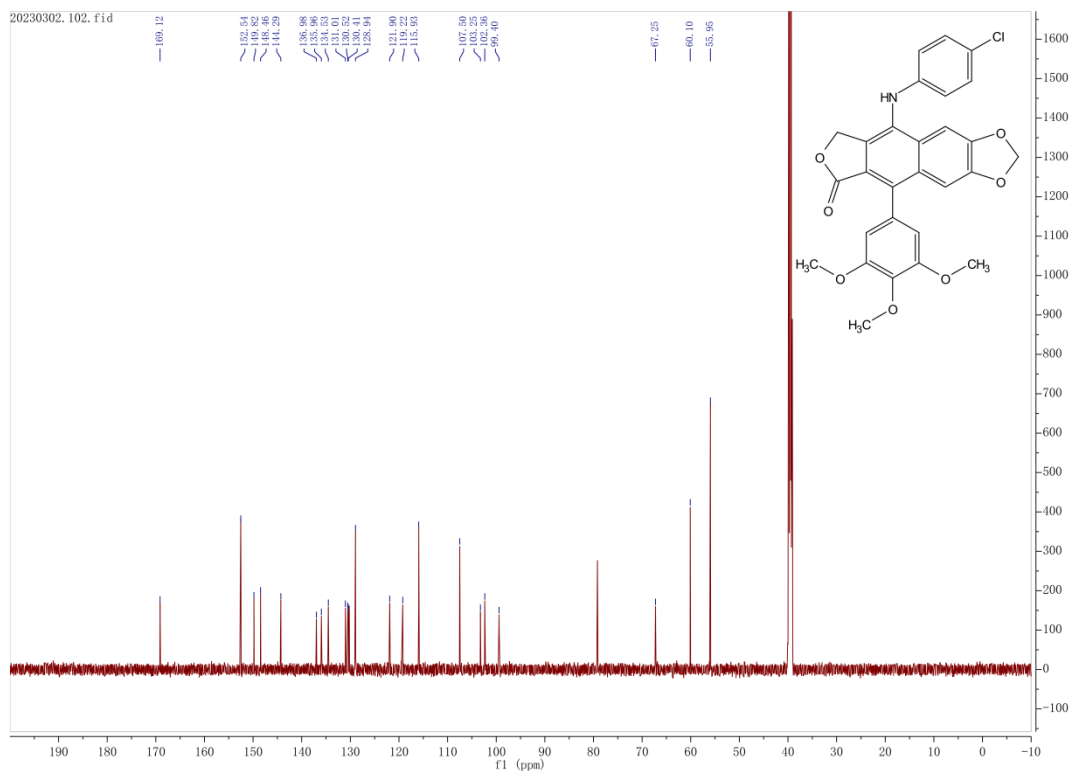

<sup>13</sup>C NMR (151 MHz, DMSO-*d*<sub>6</sub>) Spectrum of **3b**

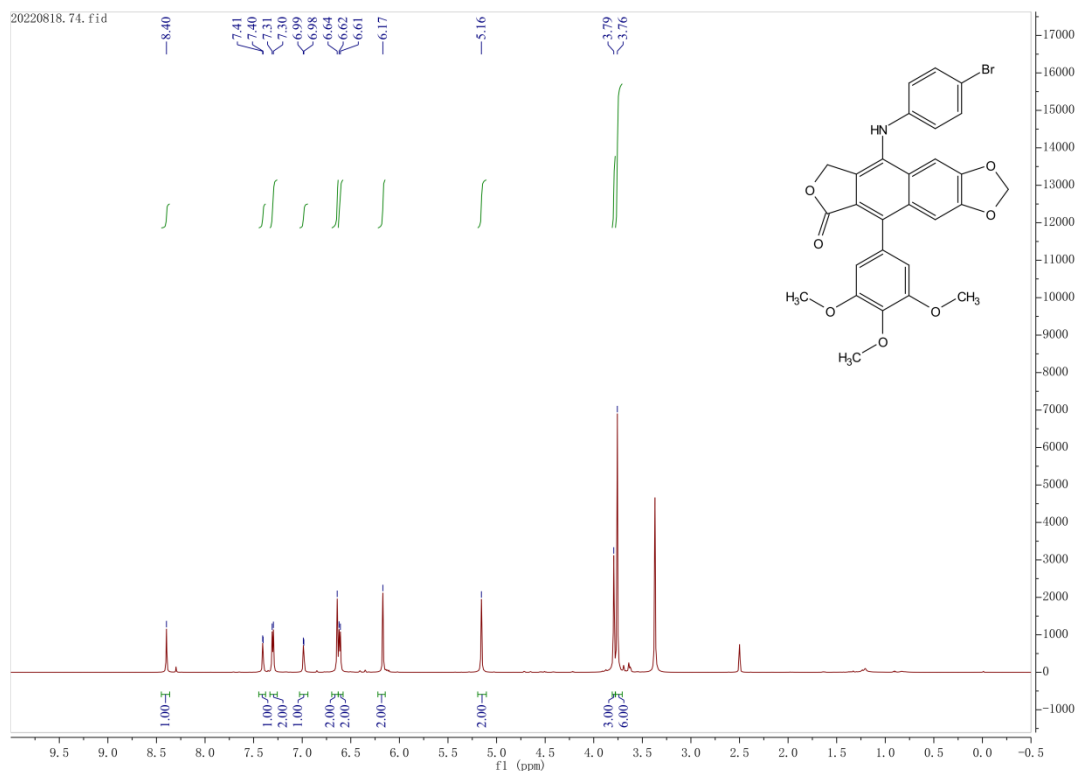

$^1\text{H}$  NMR (600 MHz,  $\text{DMSO}-d_6$ ) Spectrum of **3c**

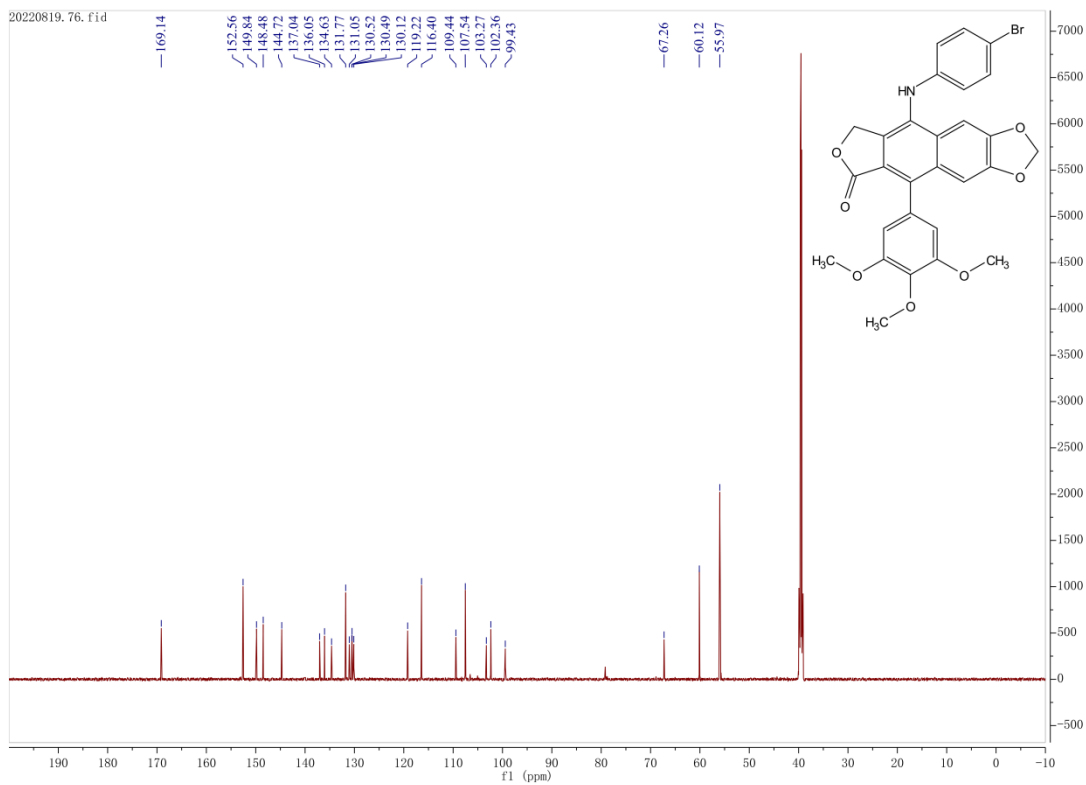

$^{13}\text{C}$  NMR (151 MHz,  $\text{DMSO}-d_6$ ) Spectrum of **3c**

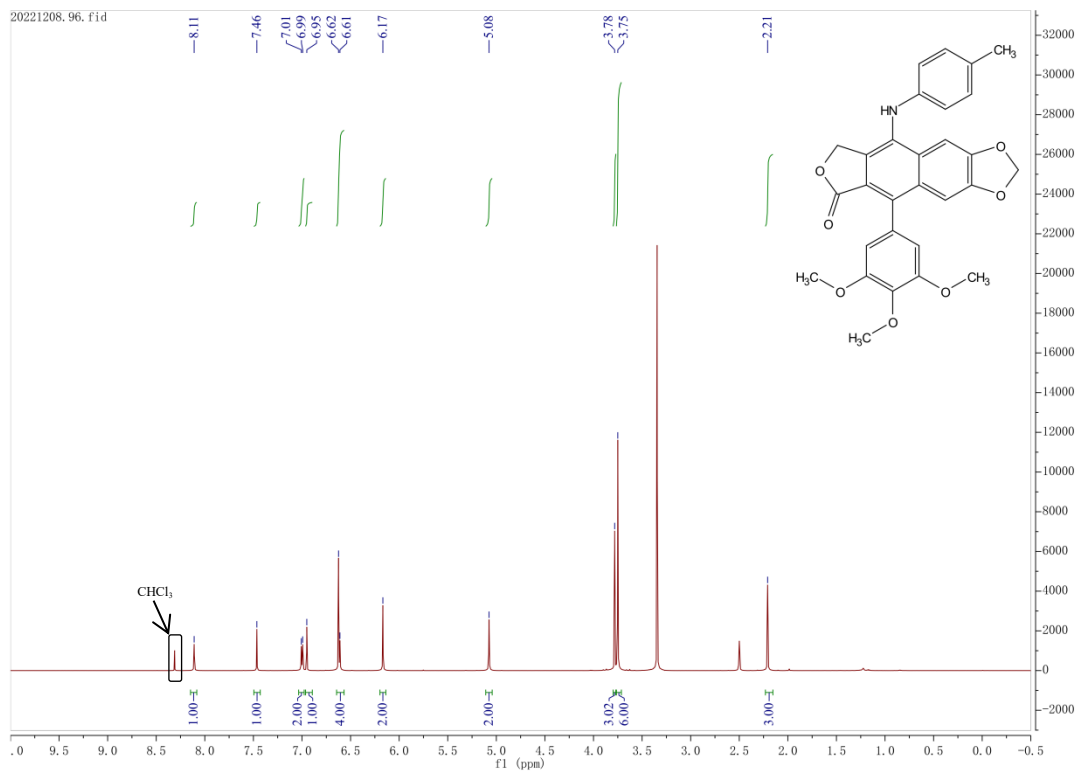

<sup>1</sup>H NMR (600 MHz, DMSO-*d*<sub>6</sub>) Spectrum of **3d**

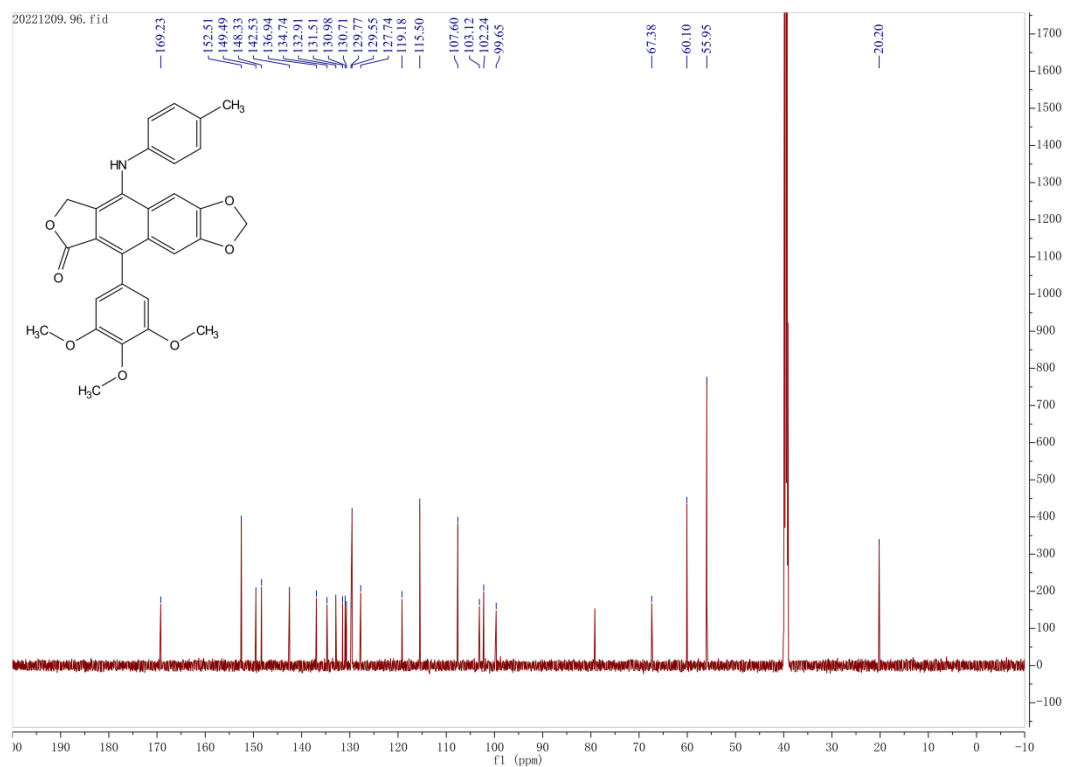

<sup>13</sup>C NMR (151 MHz, DMSO-*d*<sub>6</sub>) Spectrum of **3d**

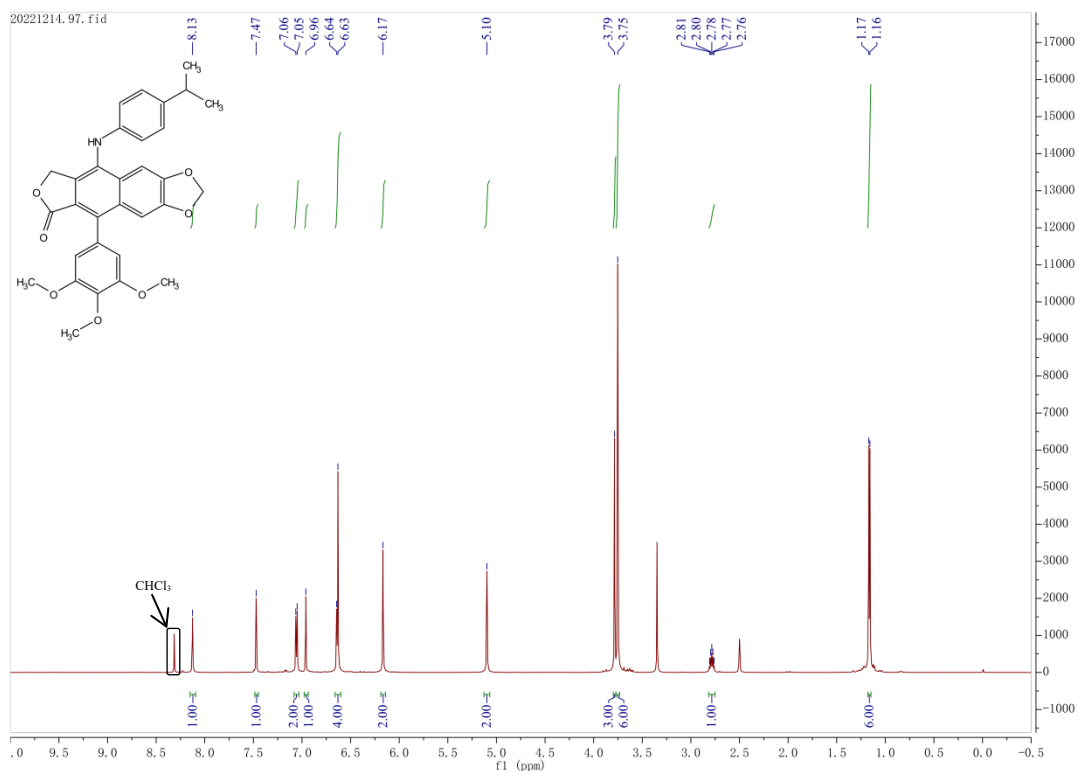

$^1\text{H}$  NMR (600 MHz,  $\text{DMSO-}d_6$ ) Spectrum of **3e**

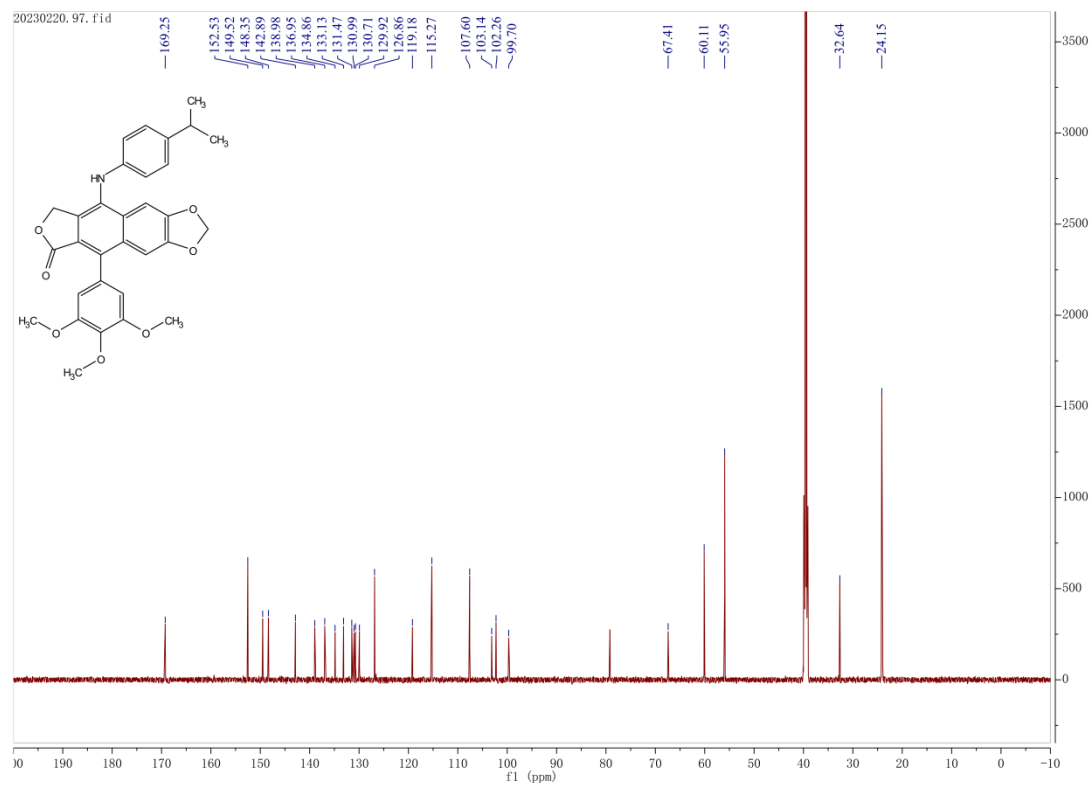

$^{13}\text{C}$  NMR (151 MHz,  $\text{DMSO-}d_6$ ) Spectrum of **3e**

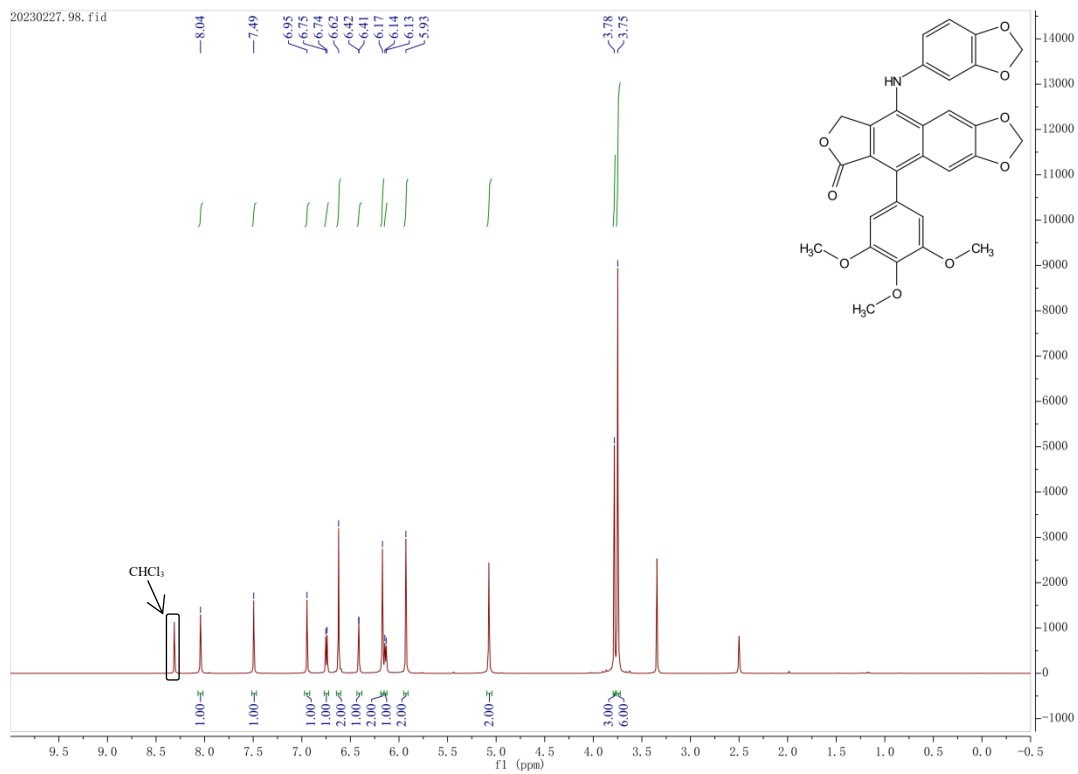

<sup>1</sup>H NMR (600 MHz, DMSO-*d*<sub>6</sub>) Spectrum of **3f**

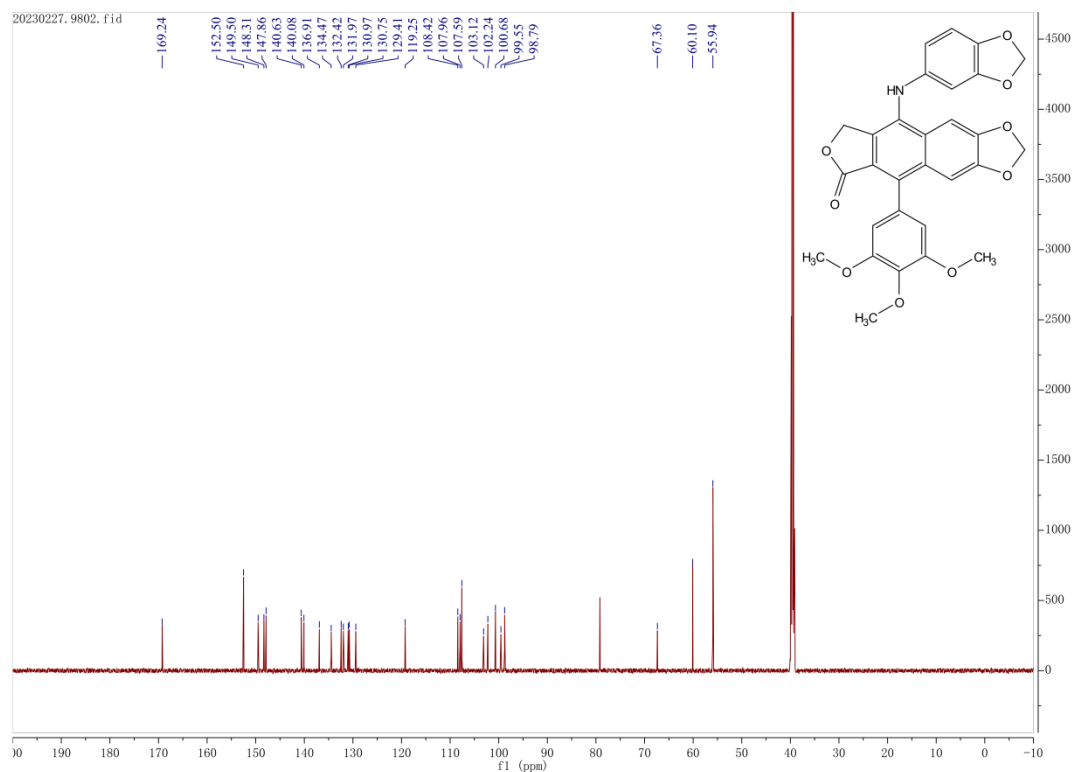

<sup>13</sup>C NMR (151 MHz, DMSO-*d*<sub>6</sub>) Spectrum of **3f**

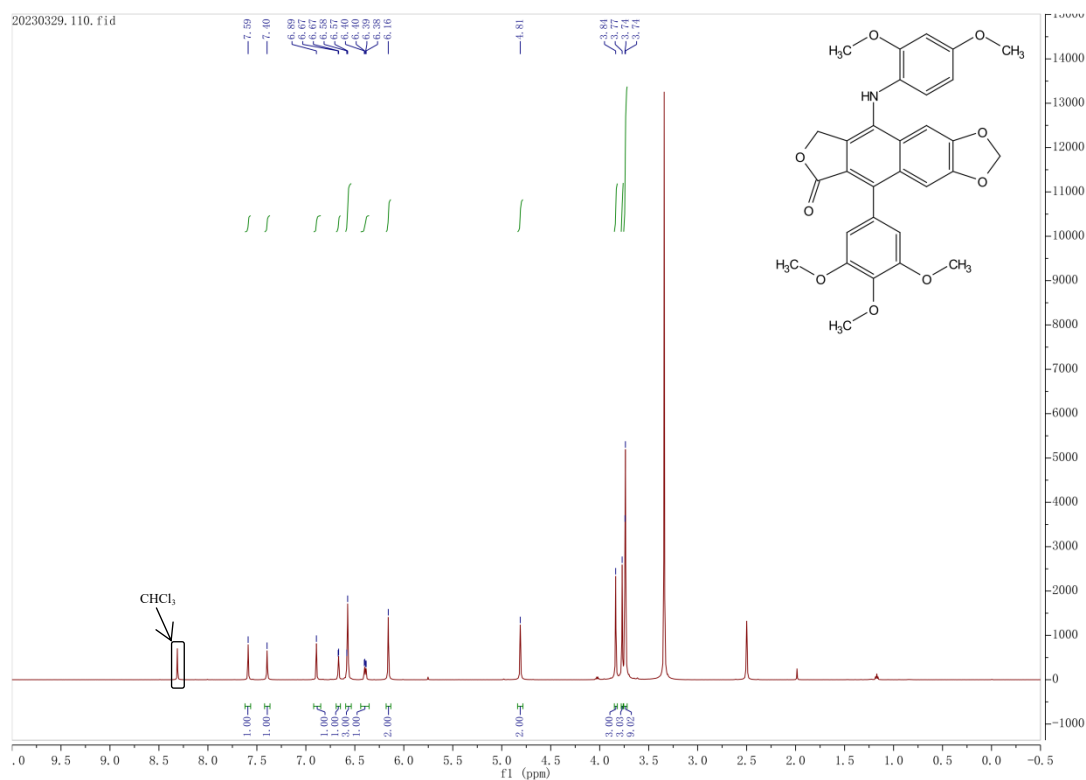

<sup>1</sup>H NMR (600 MHz, DMSO-*d*<sub>6</sub>) Spectrum of **3g**

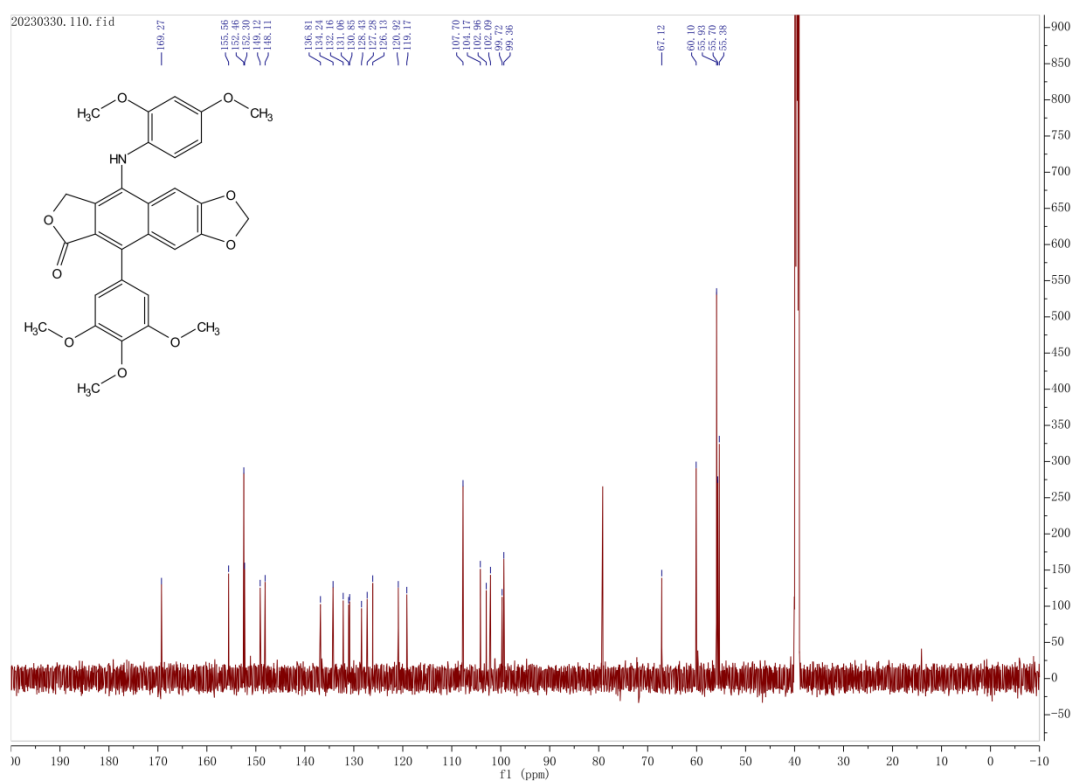

<sup>13</sup>C NMR (151 MHz, DMSO-*d*<sub>6</sub>) Spectrum of **3g**



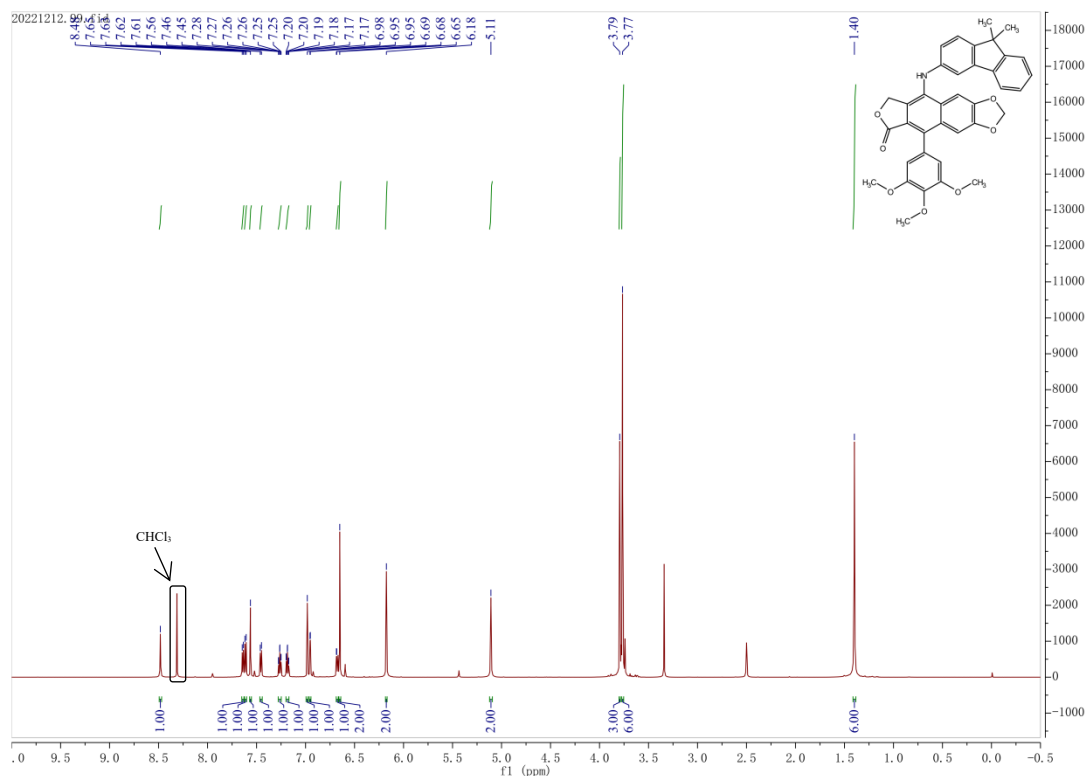

<sup>1</sup>H NMR (600 MHz, DMSO-*d*<sub>6</sub>) Spectrum of **3h**

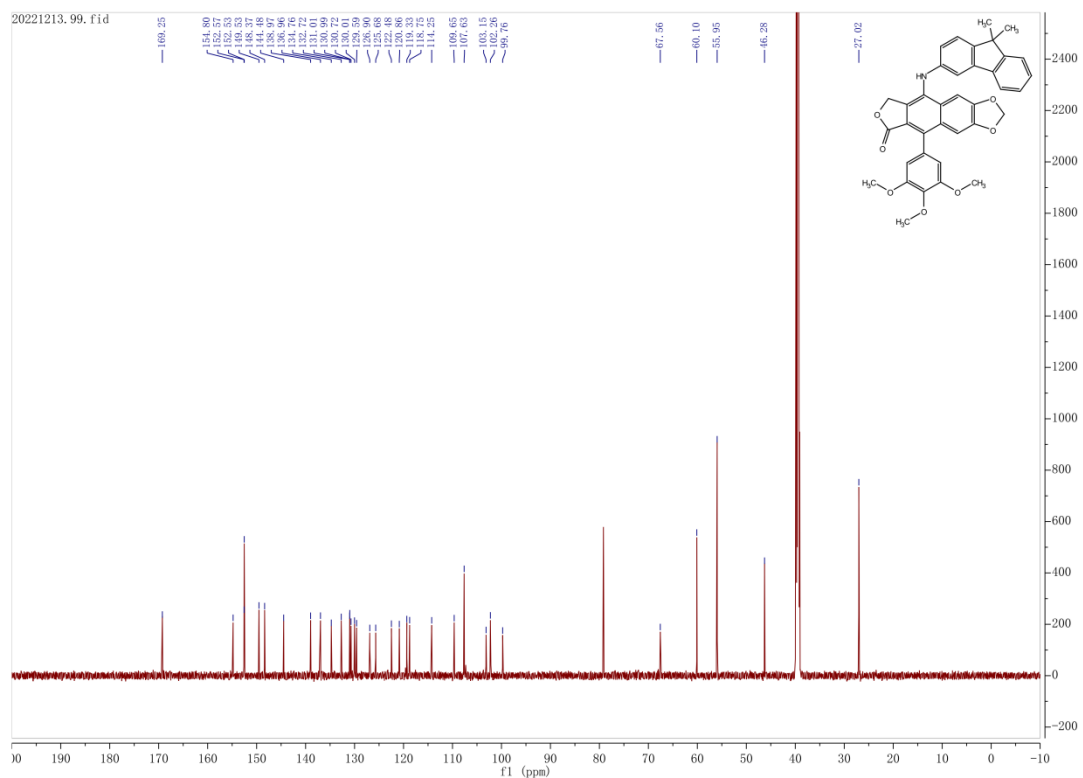

<sup>13</sup>C NMR (151 MHz, DMSO-*d*<sub>6</sub>) Spectrum of **3h**

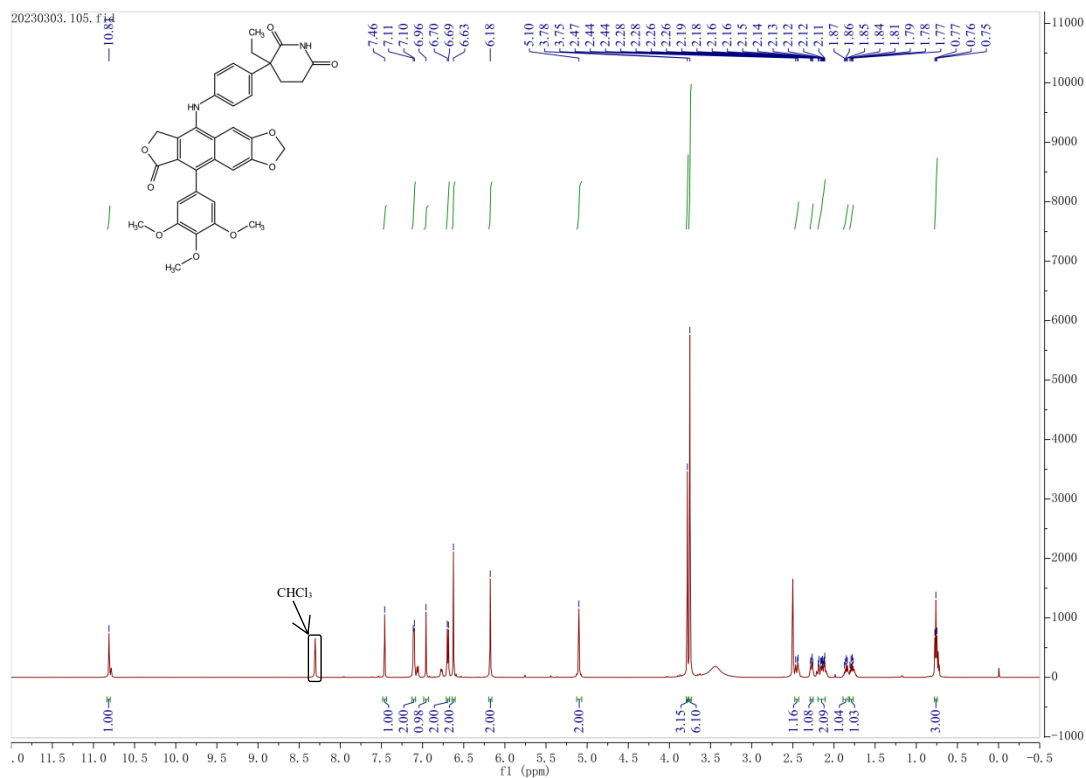

<sup>1</sup>H NMR (600 MHz, DMSO-*d*<sub>6</sub>) Spectrum of **3i**

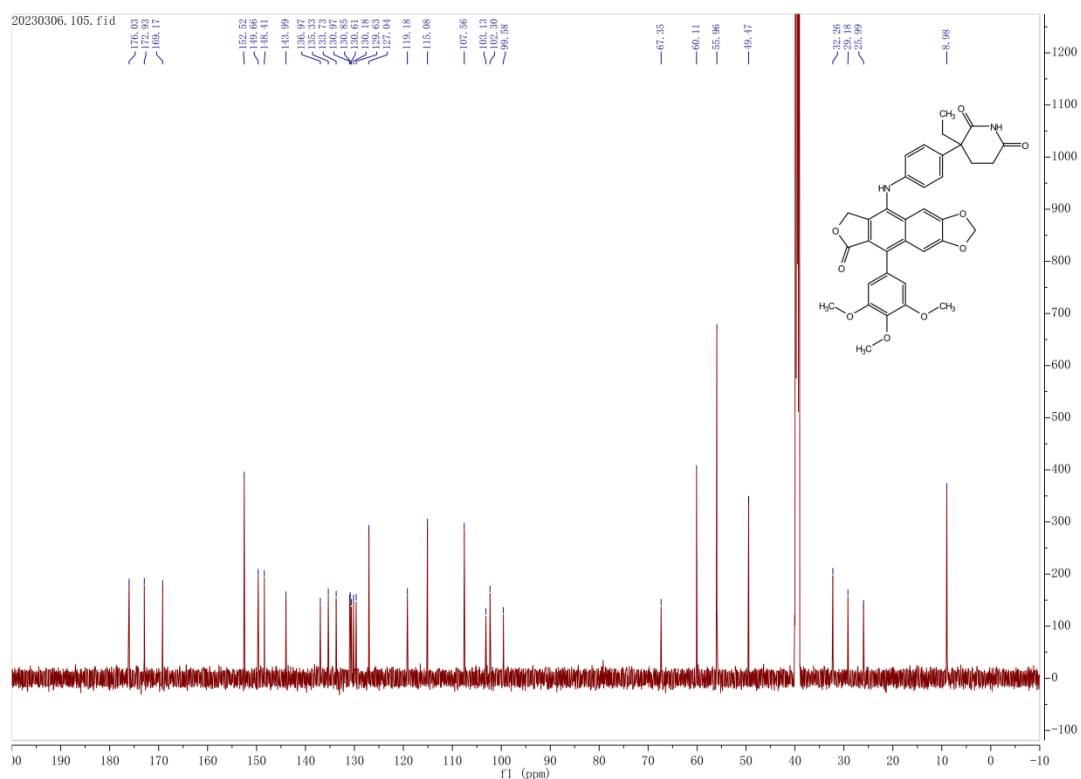

<sup>13</sup>C NMR (151 MHz, DMSO-*d*<sub>6</sub>) Spectrum of **3i**

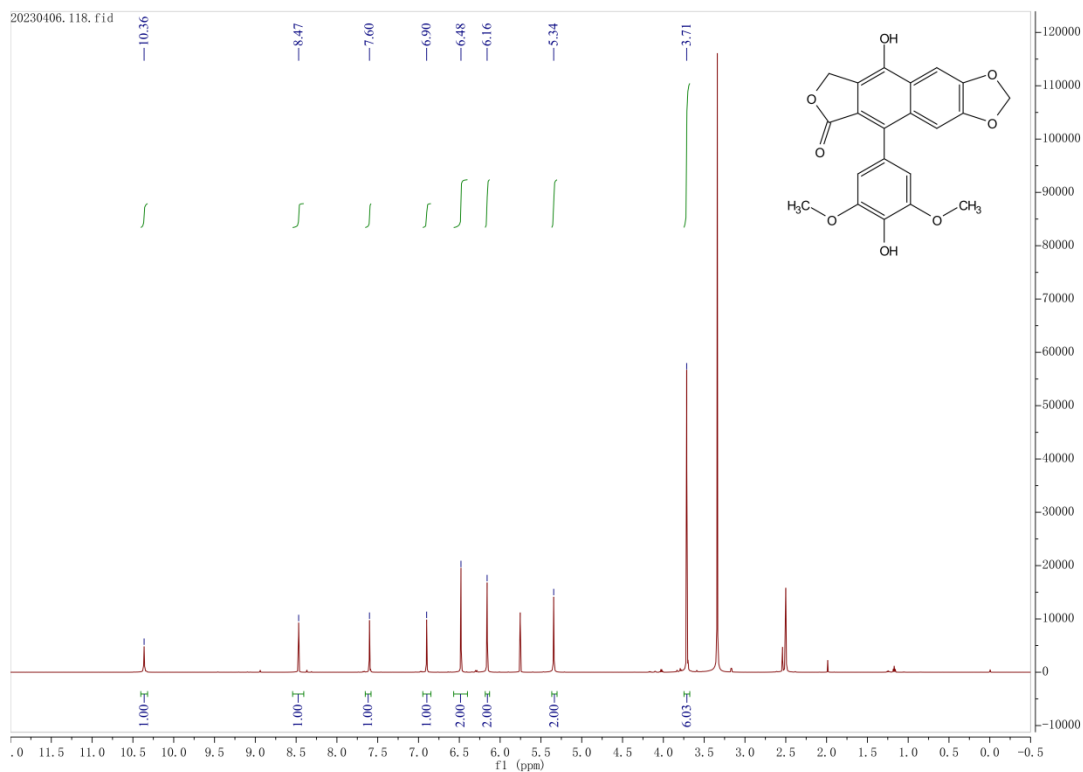

<sup>1</sup>H NMR (600 MHz, DMSO-*d*<sub>6</sub>) Spectrum of **5**

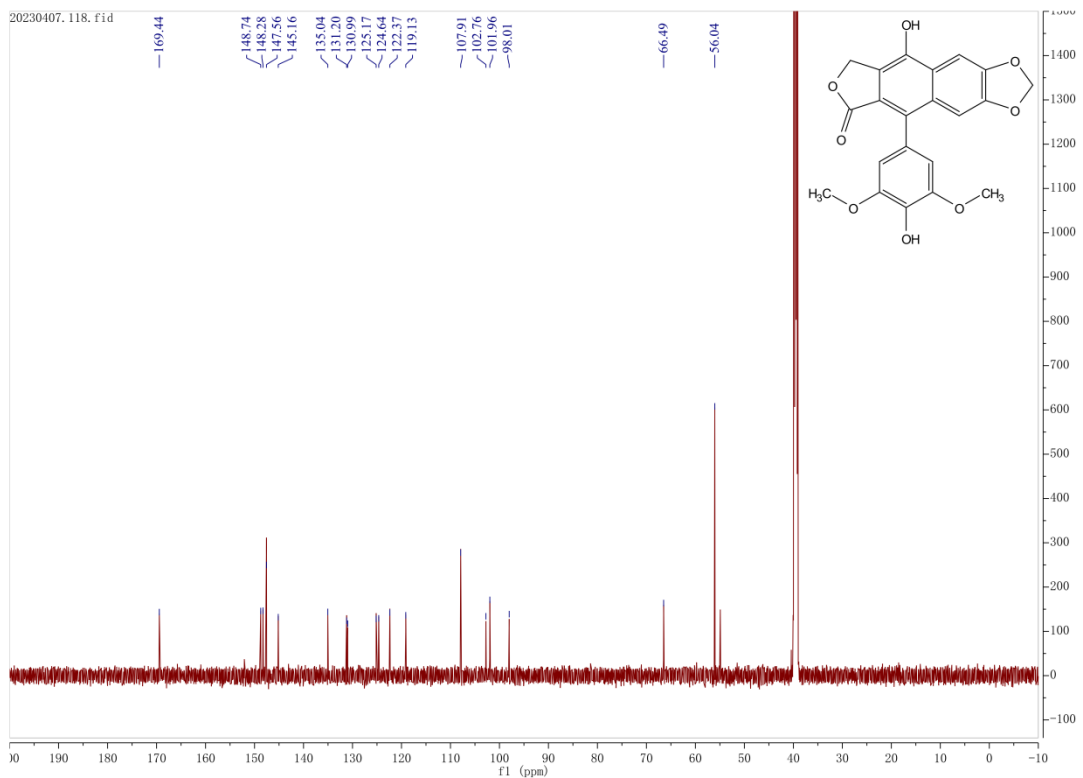

<sup>13</sup>C NMR (151 MHz, DMSO-*d*<sub>6</sub>) Spectrum of **5**

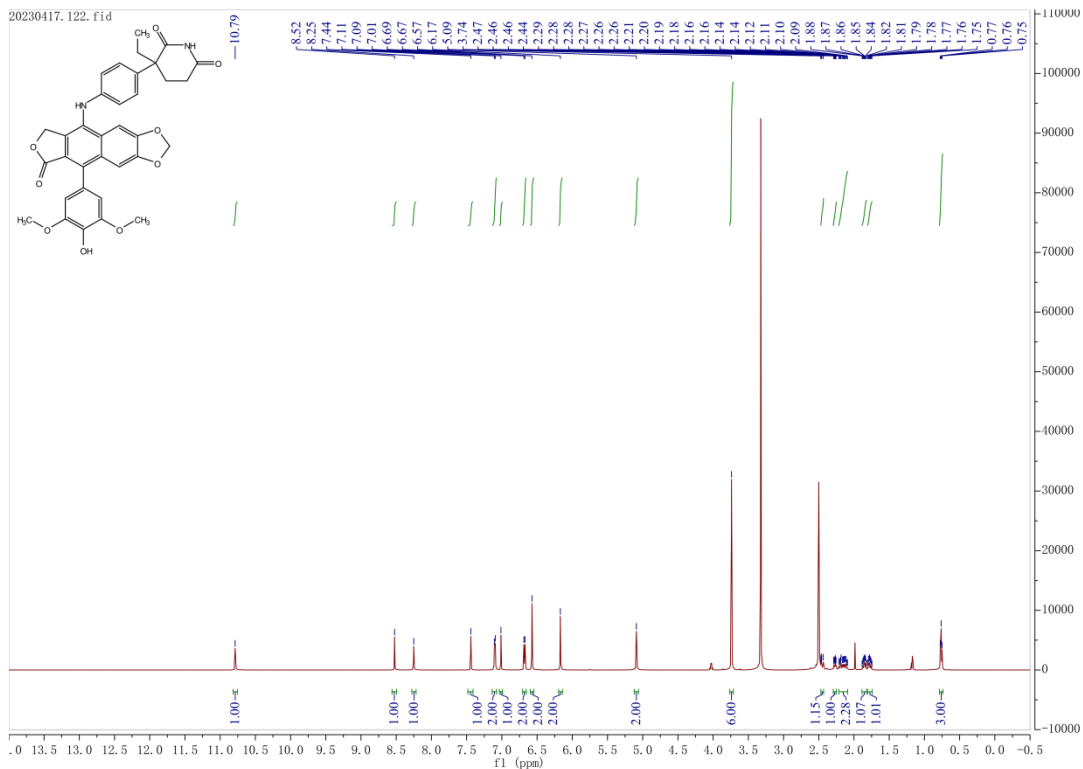

<sup>1</sup>H NMR (600 MHz, DMSO-*d*<sub>6</sub>) Spectrum of **6a**

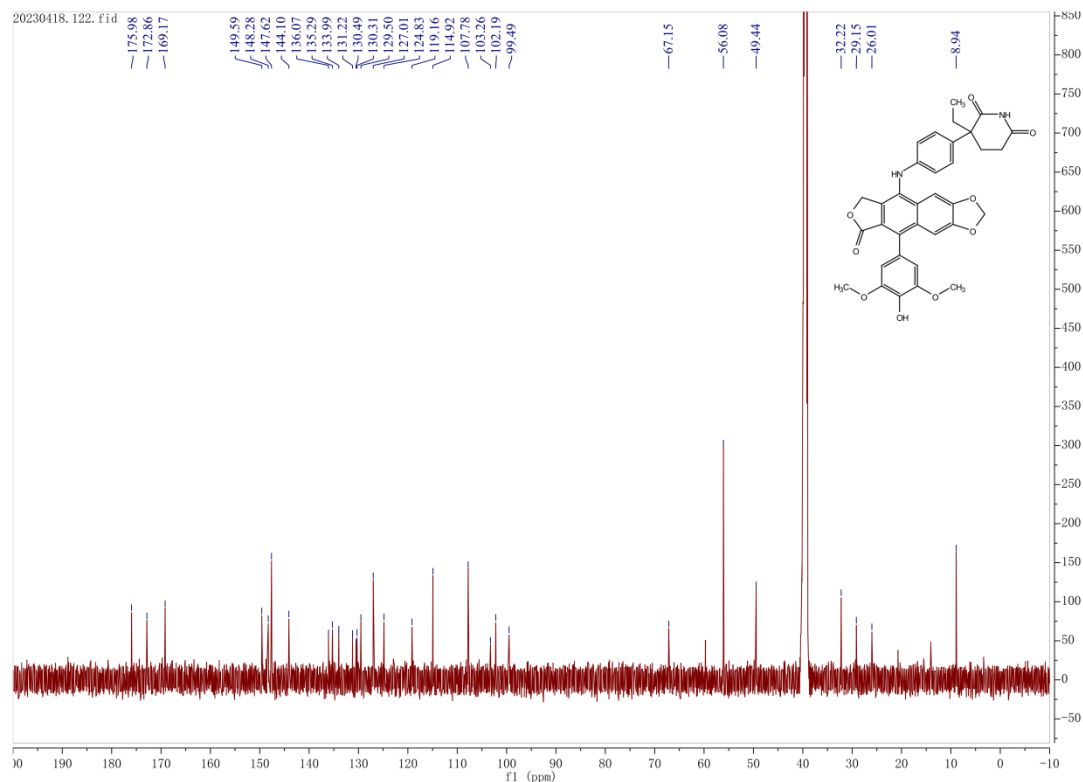

<sup>13</sup>C NMR (151 MHz, DMSO-*d*<sub>6</sub>) Spectrum of **6a**

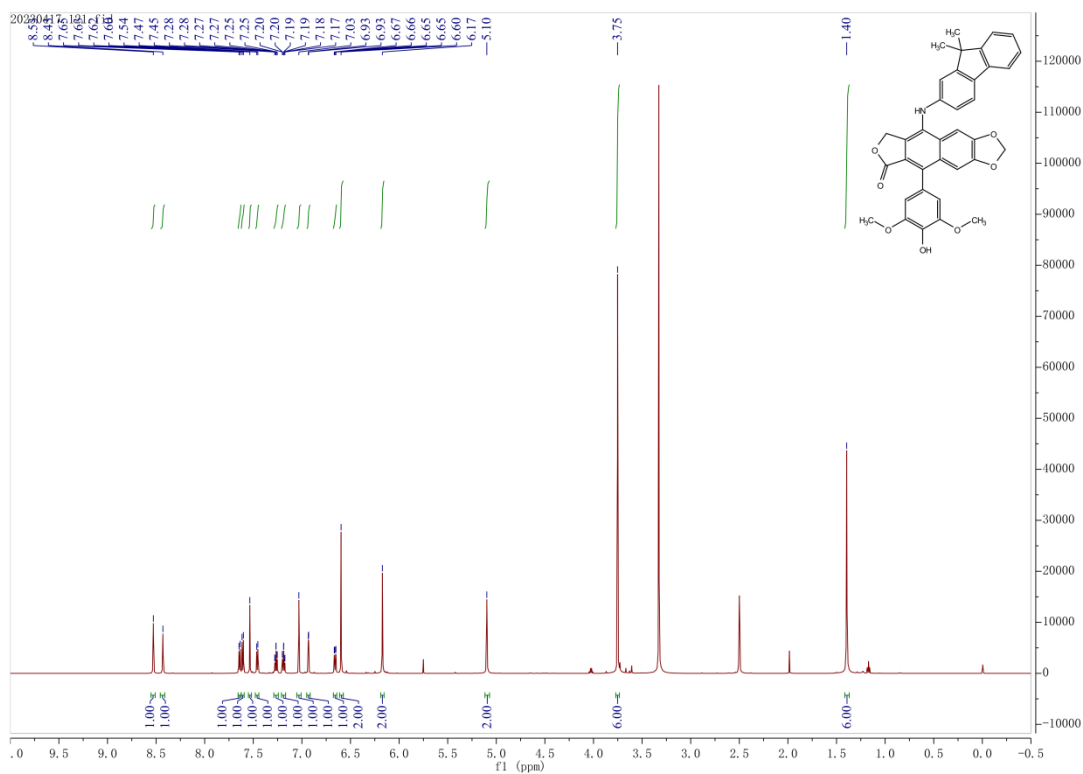

<sup>1</sup>H NMR (600 MHz, DMSO-*d*<sub>6</sub>) Spectrum of **6b**

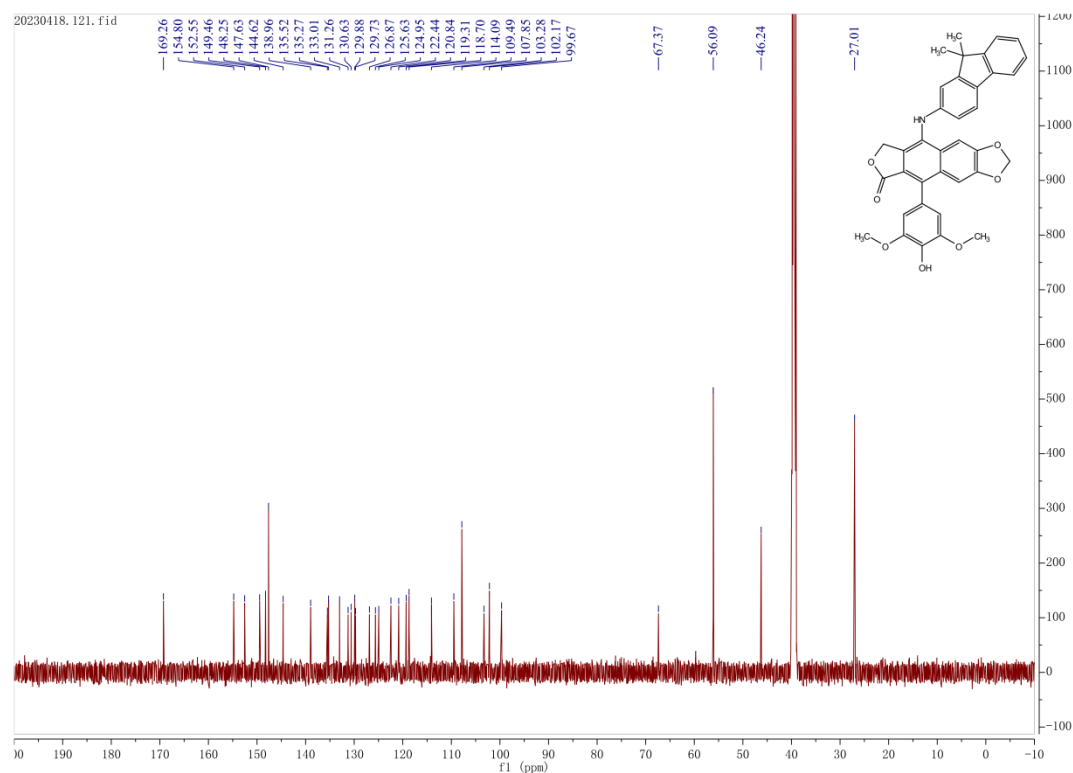

<sup>13</sup>C NMR (151 MHz, DMSO-*d*<sub>6</sub>) Spectrum of **6b**

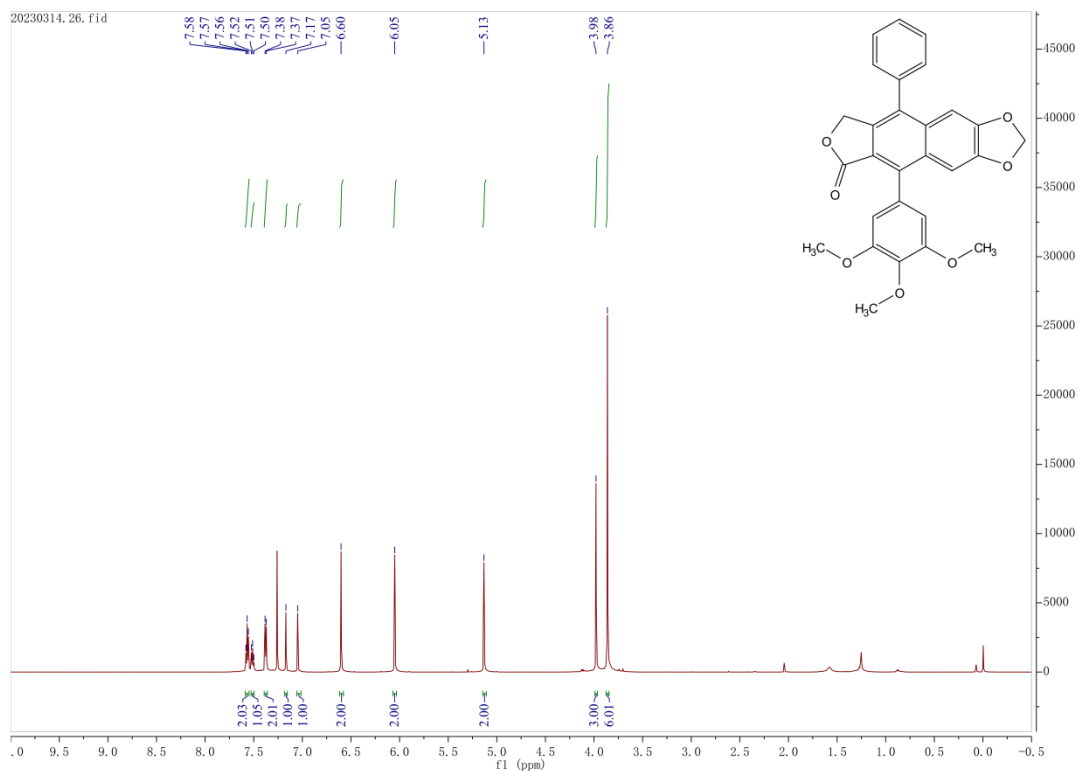

<sup>1</sup>H NMR (600 MHz, CDCl<sub>3</sub>) Spectrum of **8a**

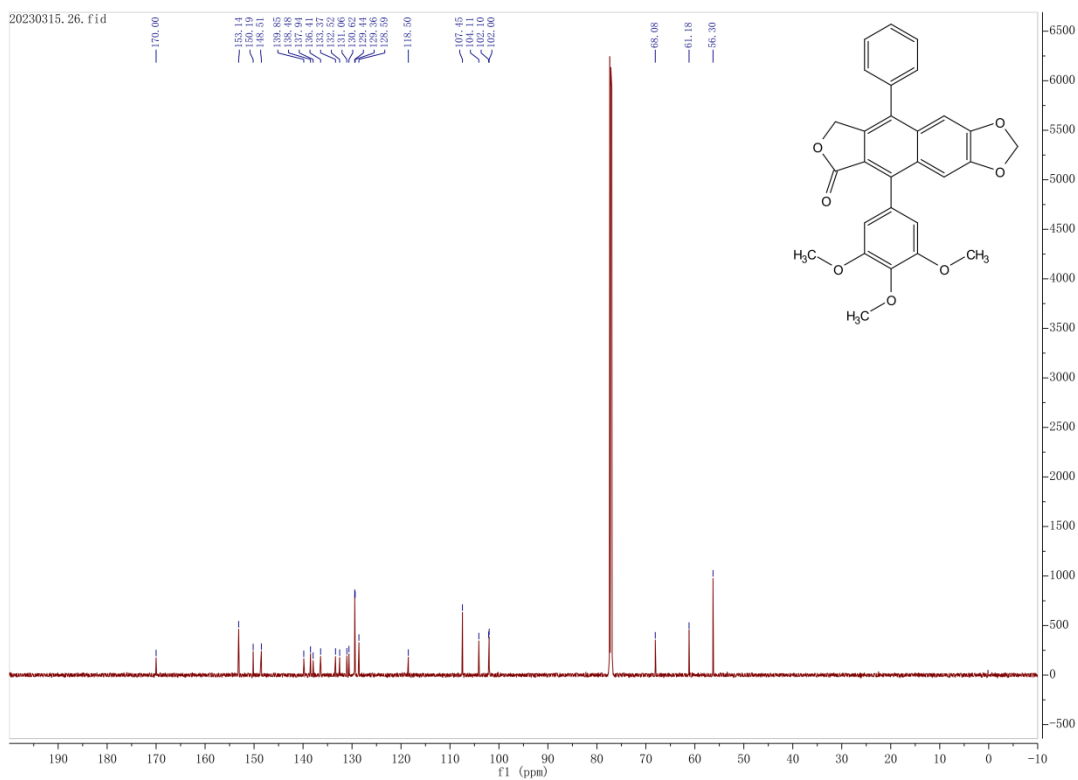

<sup>13</sup>C NMR (151 MHz, CDCl<sub>3</sub>) Spectrum of **8a**

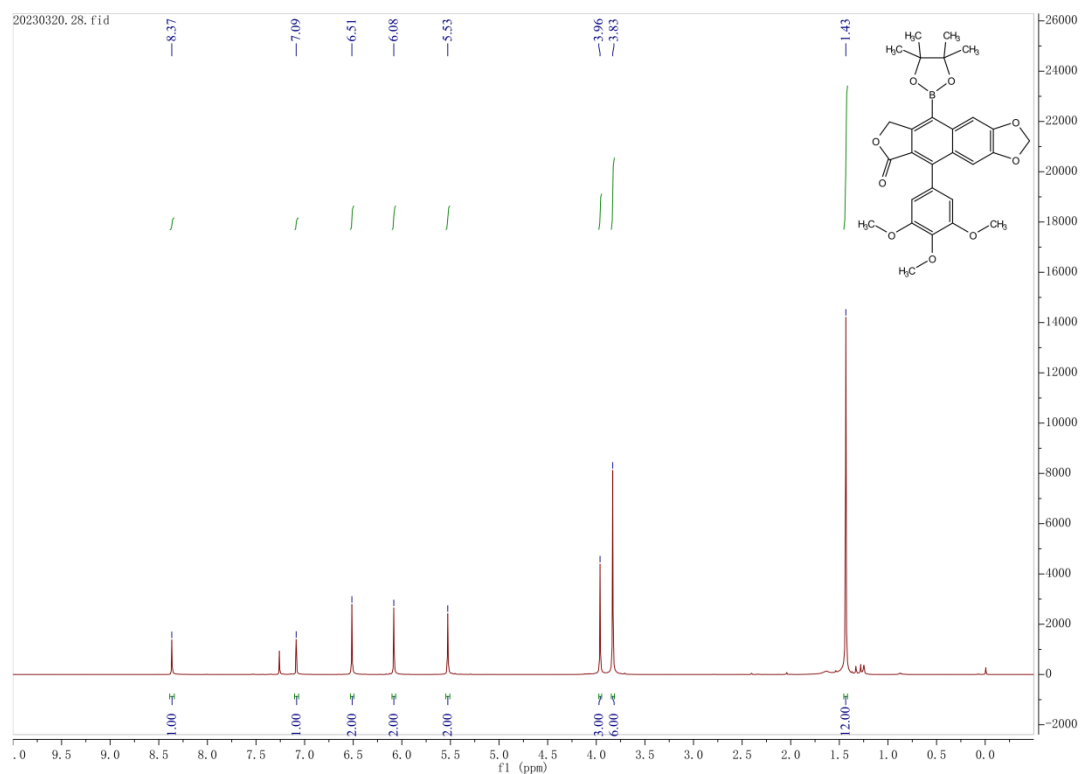

<sup>1</sup>H NMR (600 MHz, CDCl<sub>3</sub>) Spectrum of **8b**

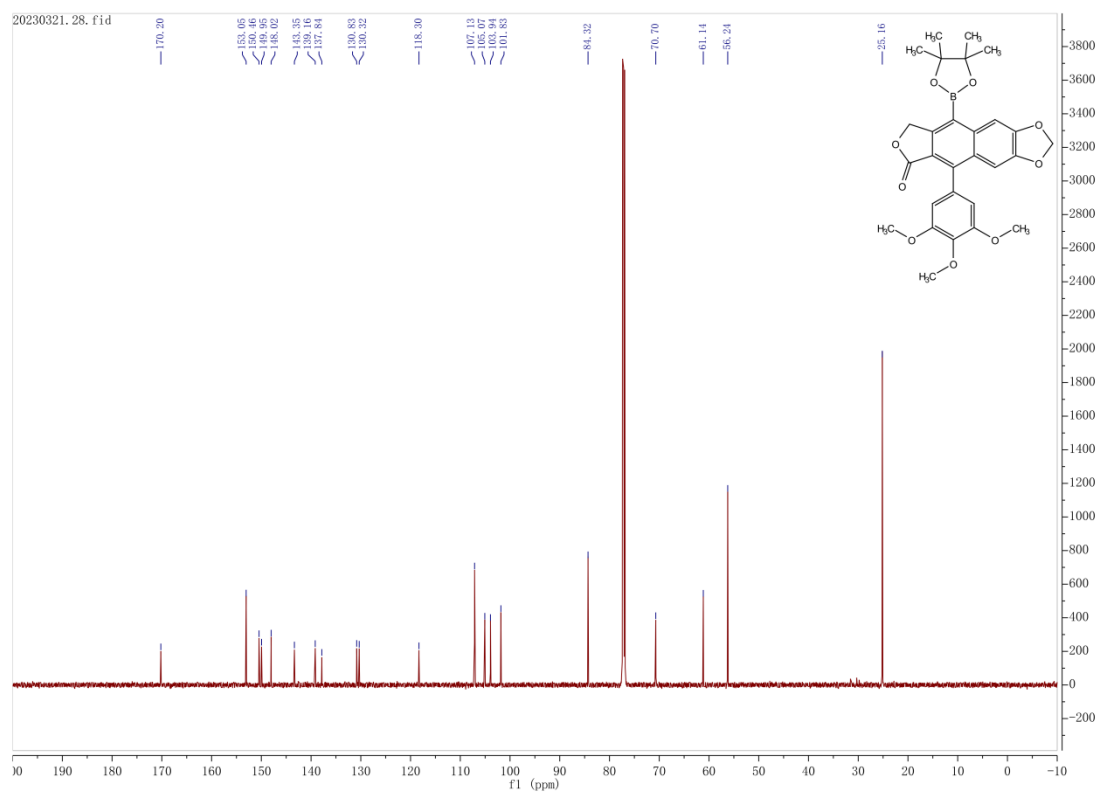

<sup>13</sup>C NMR (151 MHz, CDCl<sub>3</sub>) Spectrum of **8b**

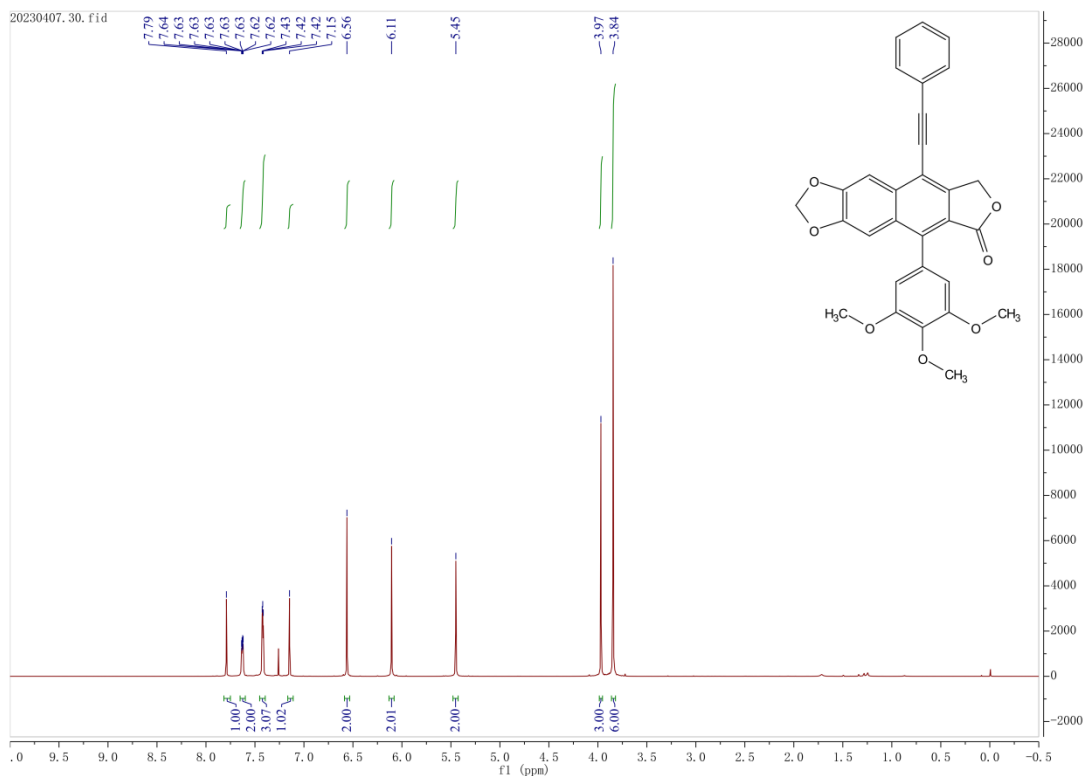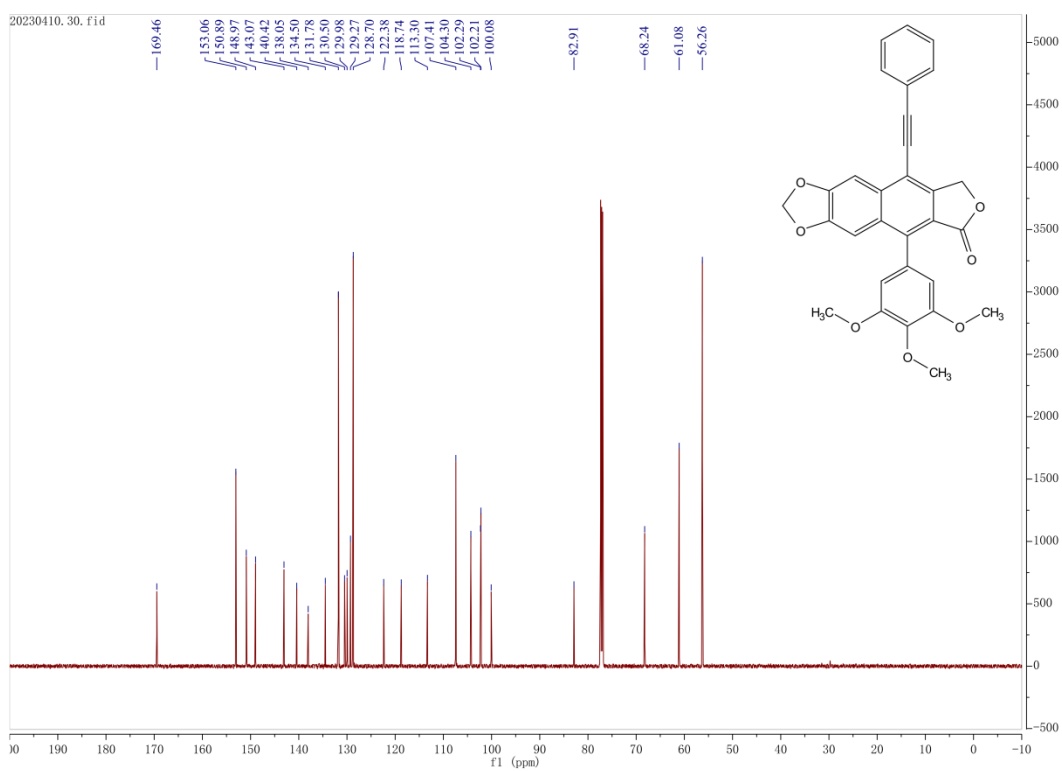

$^{13}\text{C NMR}$  (151 MHz,  $\text{CDCl}_3$ ) Spectrum of **8c**



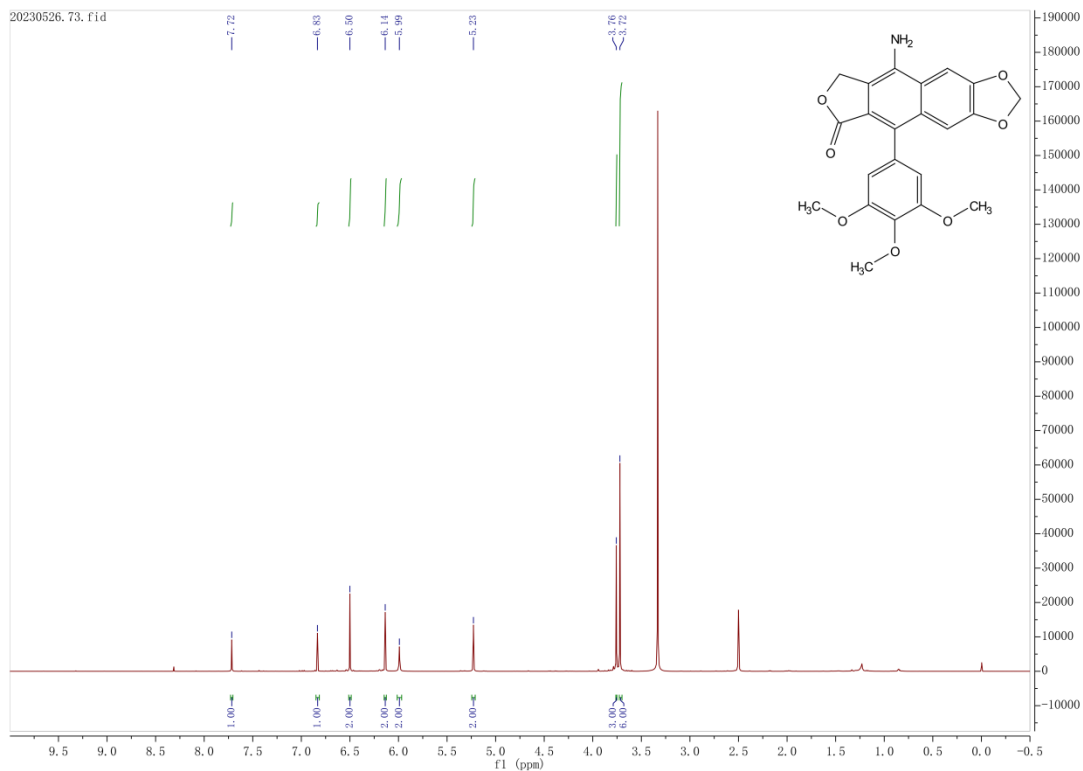

<sup>1</sup>H NMR (600 MHz, DMSO-*d*<sub>6</sub>) Spectrum of **9**

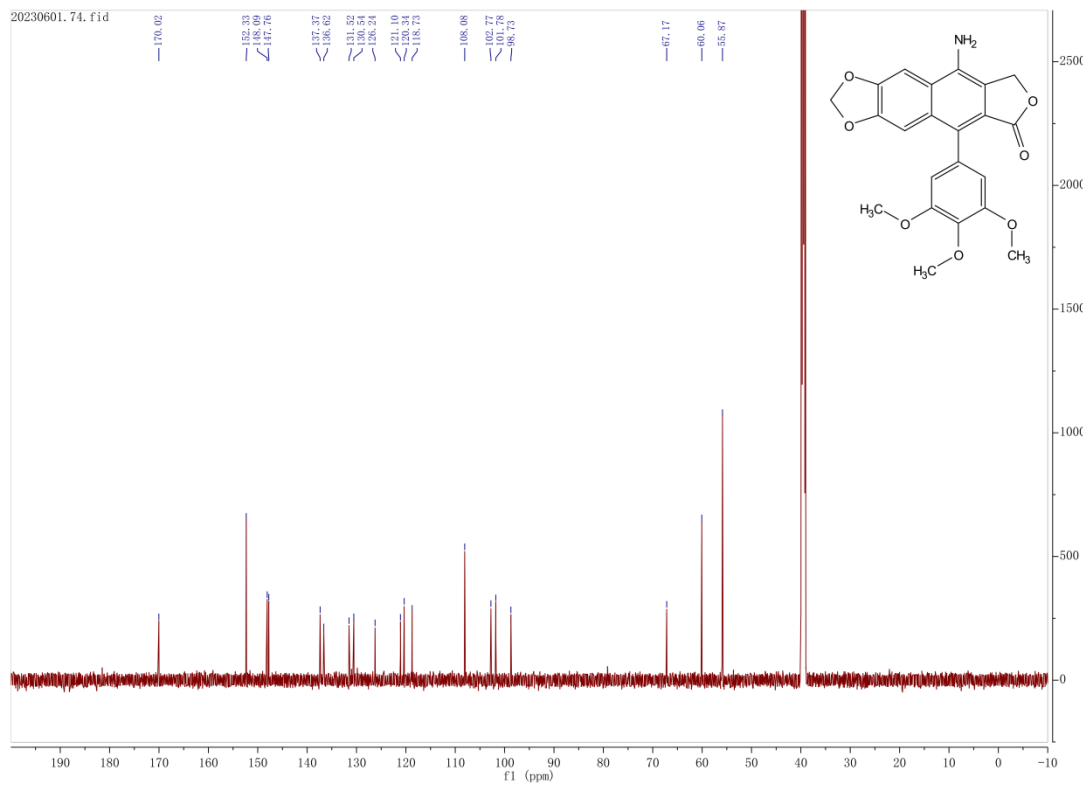

<sup>13</sup>C NMR (151 MHz, DMSO-*d*<sub>6</sub>) Spectrum of **9**

# Single crystal structure of 3b (CCDC 2262413)

## Datablock: mo\_0428\_2\_0m

|                 |                                   |                                  |                                   |
|-----------------|-----------------------------------|----------------------------------|-----------------------------------|
| Bond precision: | C-C = 0.0082 A                    | Wavelength=0.71073               |                                   |
| Cell:           | a=5.7924 (3)<br>alpha=110.796 (2) | b=11.1413 (5)<br>beta=90.433 (2) | c=12.0240 (6)<br>gamma=91.711 (2) |
| Temperature:    | 150 K                             |                                  |                                   |
|                 | Calculated                        | Reported                         |                                   |
| Volume          | 724.95 (6)                        | 724.95 (6)                       |                                   |
| Space group     | P 1                               | P 1                              |                                   |
| Hall group      | P 1                               | P 1                              |                                   |
| Moiety formula  | C28 H22 Cl N O7, C H Cl3          | C28 H22 Cl N O7, C H Cl3         |                                   |
| Sum formula     | C29 H23 Cl4 N O7                  | C29 H23 Cl4 N O7                 |                                   |
| Mr              | 639.28                            | 639.28                           |                                   |
| Dx, g cm-3      | 1.464                             | 1.464                            |                                   |
| Z               | 1                                 | 1                                |                                   |
| Mu (mm-1)       | 0.456                             | 0.456                            |                                   |
| F000            | 328.0                             | 328.0                            |                                   |
| F000'           | 328.74                            |                                  |                                   |
| h, k, lmax      | 6, 13, 14                         | 6, 13, 14                        |                                   |
| Nref            | 5106 [ 2553]                      | 5060                             |                                   |
| Tmin, Tmax      | 0.952, 0.969                      | 0.011, 0.028                     |                                   |
| Tmin'           | 0.951                             |                                  |                                   |

Correction method= # Reported T Limits: Tmin=0.011 Tmax=0.028  
AbsCorr = NONE

Data completeness= 1.98/0.99      Theta (max)= 25.003

R(reflections)= 0.0526 ( 4393)      wR2(reflections)=  
S = 1.112      Npar= 373      0.1408 ( 5060)

Datablock mo\_0428\_2\_0m - ellipsoid plot

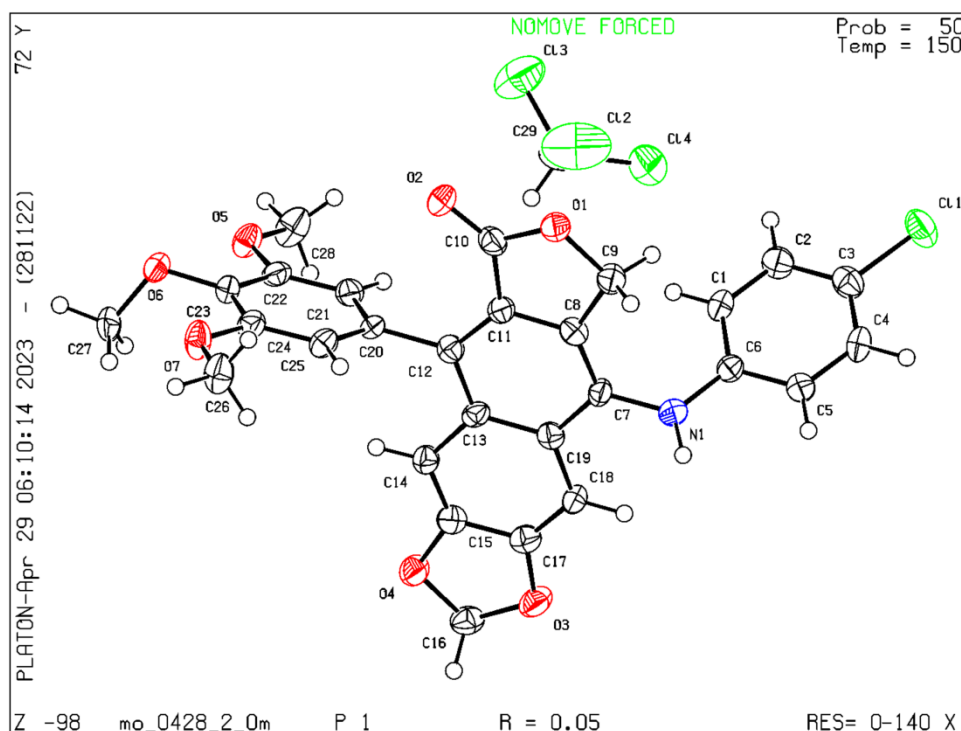

Single crystal structure of 10 (CCDC 2268279)

Datablock: 1\_a

Bond precision: C-C = 0.0058 Å Wavelength=1.54178  
 Cell: a=23.6452 (6) b=12.0393 (3) c=24.3383 (6)  
 alpha=90 beta=93.136 (2) gamma=90  
 Temperature: 300 K

|                        | Calculated                                                                 | Reported                                                         |
|------------------------|----------------------------------------------------------------------------|------------------------------------------------------------------|
| Volume                 | 6918.1 (3)                                                                 | 6918.0 (3)                                                       |
| Space group            | C 2/c                                                                      | C 2/c                                                            |
| Hall group             | -C 2yc                                                                     | -C 2yc                                                           |
| Moiety formula         | C <sub>29</sub> H <sub>23</sub> N O <sub>9</sub> , 2(C H Cl <sub>3</sub> ) | ?                                                                |
| Sum formula            | C <sub>31</sub> H <sub>25</sub> Cl <sub>6</sub> N O <sub>9</sub>           | C <sub>31</sub> H <sub>25</sub> Cl <sub>6</sub> N O <sub>9</sub> |
| Mr                     | 768.22                                                                     | 768.22                                                           |
| Dx, g cm <sup>-3</sup> | 1.475                                                                      | 1.475                                                            |
| Z                      | 8                                                                          | 8                                                                |
| Mu (mm <sup>-1</sup> ) | 4.990                                                                      | 4.990                                                            |
| F <sup>000</sup>       | 3136.0                                                                     | 3136.0                                                           |
| F <sup>000</sup> '     | 3161.71                                                                    |                                                                  |
| h, k, lmax             | 28, 14, 29                                                                 | 28, 14, 29                                                       |
| Nref                   | 6371                                                                       | 6341                                                             |
| Tmin, Tmax             | 0.577, 0.671                                                               | 0.864, 0.864                                                     |
| Tmin'                  | 0.523                                                                      |                                                                  |

Correction method= # Reported T Limits: Tmin=0.864 Tmax=0.864  
 AbsCorr = MULTI-SCAN

Data completeness= 0.995 Theta(max)= 68.575

R(reflections)= 0.0892 ( 3699) wr2 (reflections)=  
 0.3066 ( 6341)

S = 1.080 Npar= 429

Datablock 1\_a - ellipsoid plot

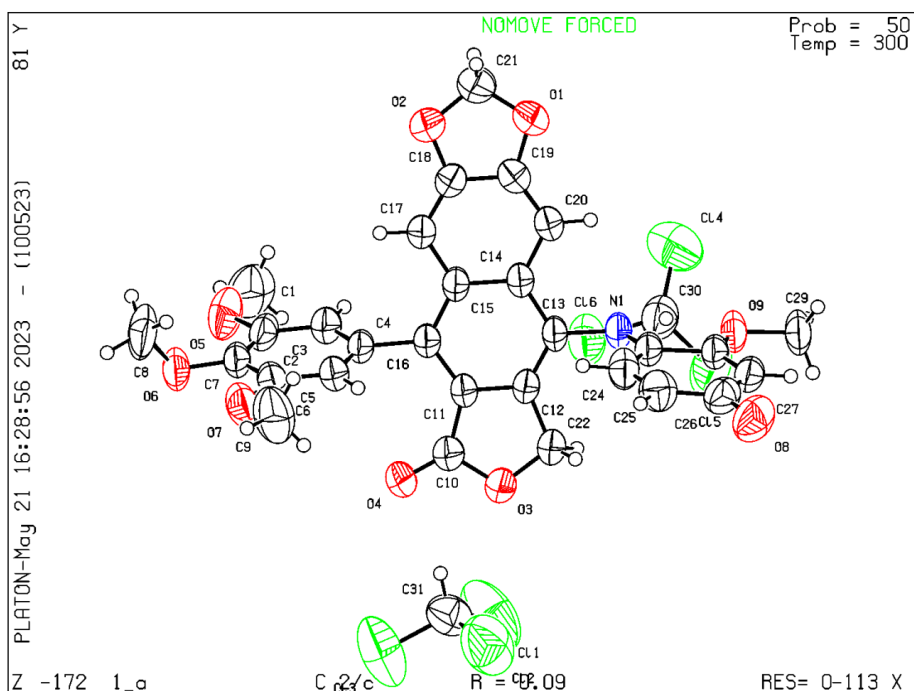

Supplement: d3ob00927k1.pdf [file d3ob00927k1.pdf]
